# Supplementary material for: The impact of school water, sanitation, and hygiene improvements on infectious disease using serum antibody detection
Source: PLoS Negl Trop Dis. 2018 Apr 16;12(4):e0006418. doi: 10.1371/journal.pntd.0006418 (PMC5919668; doi:10.1371/journal.pntd.0006418)
Supplement: S1 Dataset — (XLSX) [file pntd.0006418.s005.xlsx]

## Sheet: Sheet1
schoolcode	pupilID	pupilsex	pupilclass	pupilage	intervention	improvedwater	hhsoap	analwater	hhwash	rundate	plate	dbsid	tetanus_tox20_IgG	tetanus_tox20_IU	chik_IgG	chik_AU	rubella_IgG	rubella_IU	entamoeba_IgG	giardia_3_IgG	giardia_5_IgG	pfalciparum_msp1_42_IgG	pfalciparum_msp1_42_IU	pfalciparum_ama_IgG	pfalciparum_ama_IU	pfalciparum_msp1_19_IgG	pfalciparum_msp1_19_IU	gst33fibkgd	crypto_17_IgG	crypto_27_IgG	etec_IgG	cholera_IgG	filariasis_bm14_IgG	filariasis_bm33IgG	dengue_1_IgG	dengue_3_IgG	filariasis_wb123_IgG	trachoma_pgp3_IgG	trachoma_ct694_IgG	cysticercosis_IgG	pvivax_IgG	schisto_crudeegg_IgG	schisto_IgG	yellowfever_IgG	salmonellaB_IgG	salmonellaD_IgG	noro_norwalk_IgG	noro_sydney_IgG	noro_stcloud_IgG
118	11850	1	1		1	1	0	0	1	2015-04-17	1	Mali 11850	228	0.01	93	1.1	28667	OOR >	1227	234	385	8150	32.3	8388	24.4	227	3.4	70	6675	4156	27215	22745	55	934	711	255	65	56	157	160	77	5099	177	289	52	96	28885	28250	7161
118	11851	1	1		1	1	0	0	1	2015-04-17	1	Mali 11851	29400	1.58	124	1.4	29589	OOR >	64	193	266	29562	OOR >	29531	OOR >	257	3.7	234	26131	29869	4844	7535	108	1888	514	347	100	106	291	123	154	643	200	758	63	51	110	25574	394
118	11852	0	1		1	1	0	1	1	2015-04-17	1	Mali 11852	694	0.03	111	1.3	29304	OOR >	94	340	414	4523	21.4	29973	OOR >	131	2.2	136	3847	7553	15385	7056	87	1401	1385	1154	114	85	228	197	117	11550	206	314	60	48	156	92	98
118	11853	0	1		1	1	0	0	1	2015-04-17	1	Mali 11853	387	0.02	145	1.7	29607	OOR >	4691	344	684	759	6	30756	OOR >	118	2	214	6148	7364	9534	5406	105	25227	9079	7375	93	105	295	448	1274	739	299	4228	71	95	150	27641	257
118	11854	0	2		1	1	0	0	1	2015-04-17	1	Mali 11854	30374	>2.39	55	0.5	28384	56.5	1620	223	228	11147	40.2	30302	OOR >	100	1.8	37	221	2283	23630	6376	29	526	6762	5310	28	66	65	111	54	172	59	1055	24	19	66	28242	97
118	11855	1	2	10	1	1	0	0	1	2015-04-17	1	Mali 11855	7231	0.17	171	2	29376	OOR >	4013	3003	984	30968	OOR >	31481	OOR >	27779	*124.6	220	1502	1101	5374	3809	189	1032	358	233	198	144	259	418	579	834	205	228	92	1609	227	27189	405
118	11856	0	2	9	1	1	0	0	1	2015-04-17	1	Mali 11856	31235	>2.39	54	0.5	25154	24.1	665	243	387	27792	OOR >	1455	6.4	26141	*119.1	48	429	7141	26147	23285	59	497	2591	1485	230	38	107	265	66	1672	129	769	48	82	3946	4718	972
118	11857	0	3	10	1	1	0	0	1	2015-04-17	1	Mali 11857	447	0.02	687	6	29140	OOR >	997	830	3097	30039	OOR >	31922	OOR >	17515	88.4	257	990	8129	24690	10938	154	2226	705	291	295	124	518	576	585	4744	788	307	340	308	26148	8105	1089
118	11858	1	3	11	1	1	0	0	1	2015-04-17	1	Mali 11858	29900	2.09	189	2.1	29282	OOR >	828	1074	561	27280	OOR >	30447	OOR >	309	4.3	102	1012	13136	18255	6314	93	1177	561	211	72	61	226	238	532	1076	229	201	555	50	69	17794	151
118	11859	1	3	10	1	1	0	0	1	2015-04-17	1	Mali 11859	251	<.005	144	1.7	27732	35.8	623	25520	1145	27298	OOR >	31063	OOR >	2994	23.8	154	2016	7810	1999	2629	161	2585	2861	1854	214	142	289	298	227	266	157	441	49	70	31425	23517	20769
118	11860	1	4	11	1	1	0	0	1	2015-04-17	1	Mali 11860	447	0.02	149	1.7	29103	OOR >	53	1455	1550	2232	13	24105	57	789	8.8	116	3027	9499	12296	12803	79	2825	645	338	119	186	147	230	134	994	166	245	196	320	175	25960	292
118	11861	0	4	12	1	1	0	0	1	2015-04-17	1	Mali 11861	4067	0.13	354	3.6	14674	11.4	17143	502	601	26895	OOR >	27548	OOR >	2846	22.9	61	1615	1593	5931	3171	56	543	606	505	128	45	169	293	242	5615	200	179	44	62	23259	24679	1072
118	11862	0	5	11	1	1	0	0	1	2015-04-17	1	Mali 11862	13244	0.24	51	0.4	25177	24.1	923	74	78	29208	OOR >	29997	OOR >	94	1.7	88	830	3242	8470	2727	49	355	4544	3346	33	55	203	76	62	251	69	1676	36	30	89	23025	152
118	11863	0	5	12	1	1	0	0	1	2015-04-17	1	Mali 11863	453	0.02	145	1.7	18522	14.9	746	95	130	25932	OOR >	31492	OOR >	26255	*119.5	110	187	1142	4778	1838	74	1159	5776	4627	91	2486	507	233	125	404	209	2819	5716	210	95	23698	279
118	11864	1	5	11	1	1	0	0	1	2015-04-17	1	Mali 11864	27415	0.79	81	0.9	26414	27.7	5541	539	723	9615	36.3	102	0.8	2441	20.4	53	1988	2205	702	299	49	1640	1399	930	61	51	82	193	94	9157	104	255	39	89	105	22118	291
118	11865	0	6	12	1	1	0	0	1	2015-04-17	1	Mali 11865	533	0.02	140	1.6	28043	40.6	403	179	187	30010	OOR >	10340	28.7	2706	22	125	1023	2423	1151	966	99	2446	686	539	98	86	171	268	128	771	276	257	55	60	194	1127	350
118	11866	1	6	13	1	1	0	1	1	2015-04-17	1	Mali 11866	29504	1.66	236	2.6	27513	33.7	144	735	412	31070	OOR >	16184	40.4	30376	*133.2	482	2510	2186	1108	1404	192	3504	9194	7260	590	163	782	296	524	4298	623	2463	94	75	31026	25312	951
118	11867	1	6	13	1	1	0	0	1	2015-04-17	1	Mali 11867	30023	2.11	2115	13.7	23059	20.3	706	545	236	29095	OOR >	30545	OOR >	123	2.1	141	2173	551	6438	2586	115	1803	7794	5960	167	62	185	245	129	791	299	1817	80	57	31538	27540	5423
239	23950	1	1		1	1	0	1	1	2015-04-17	1	Mali 23950	601	0.02	95	1.1	25585	25.1	7758	479	413	332	3.2	31049	OOR >	232	3.5	68	2397	13241	5021	2961	38	835	280	159	66	768	151	1149	315	3083	438	163	43	28	19418	5144	1399
239	23951	0	1		1	1	0	1	1	2015-04-17	1	Mali 23951	7579	0.17	186	2.1	526	*0.2	904	1413	629	30428	OOR >	30235	OOR >	364	4.9	45	384	337	29244	29629	45	761	990	377	53	33	131	134	55	3590	75	325	30	16	101	28876	141
239	23952	1	1		1	1	0	1	2	2015-04-17	1	Mali 23952	28343	1.05	80	0.9	26519	28.1	2530	398	642	26389	OOR >	7495	22.4	406	5.3	79	561	671	5601	8120	78	390	485	270	51	49	177	341	107	2659	335	195	57	24	280	10943	164
239	23953	0	2	8	1	1	0	1	1	2015-04-17	1	Mali 23953	18054	0.31	85	0.9	817	0.4	3083	471	552	29637	OOR >	6033	19	28966	*128.5	44	1152	4995	24140	20361	50	724	3391	2493	43	31	135	120	70	2675	97	685	90	42	132	25419	414
239	23954	1	2	7	1	1	0	0	1	2015-04-17	1	Mali 23954	24579	0.52	88	1	759	0.4	1592	392	818	28443	OOR >	25807	65.1	1414	13.6	82	3576	1430	1556	1937	127	2595	231	145	72	68	980	464	235	3420	292	148	118	62	101	26790	1919
239	23955	0	2	8	1	1	0	1	1	2015-04-17	1	Mali 23955	29529	1.7	142	1.6	26431	27.8	588	787	914	27006	OOR >	27231	OOR >	16215	83.5	92	16391	14449	28096	25737	73	578	5169	4898	85	98	154	171	105	26597	294	749	72	94	451	29215	2196
239	23956	1	3	10	1	1	0	0	1	2015-04-17	1	Mali 23956	8851	0.19	177	2	29310	OOR >	295	10665	480	31361	OOR >	843	4.2	30935	*135.0	650	487	716	2513	1217	340	1523	3130	2321	100	808	847	379	701	2194	481	809	147	81	134	14409	299
239	23957	1	3	9	1	1	0	0	1	2015-04-17	1	Mali 23957	4975	0.14	104	1.2	28406	59.5	1608	2156	2909	25149	88.4	31061	OOR >	212	3.2	255	2079	1173	12020	6204	138	1108	606	314	94	96	259	368	130	6648	238	323	72	87	294	28880	1040
239	23958	0	4	11	1	1	0	0	1	2015-04-17	1	Mali 23958	31467	>2.39	174	2	3804	2.5	200	217	437	2491	14.1	28323	OOR >	1720	15.7	68	4187	11582	13502	1749	83	3553	6218	6257	77	42	209	290	301	10831	200	1936	86	54	380	5109	903
239	23959	1	4	10	1	1	0	1	1	2015-04-17	1	Mali 23959	19644	0.34	136	1.6	22517	19.5	30412	119	475	2366	13.6	29958	OOR >	316	4.4	160	3396	3604	8250	4715	85	393	666	435	107	75	153	1131	206	1514	367	1264	68	69	120	27088	146
239	23960	1	4	11	1	1	0	1	1	2015-04-17	1	Mali 23960	25613	0.57	150	1.7	28402	59	212	579	527	10444	38.4	4141	14.2	398	5.2	75	1393	5900	3855	1520	86	700	8838	6818	81	450	1604	406	164	15996	265	860	63	32	30386	22041	1470
239	23961	0	4	12	1	1	0	0	1	2015-04-17	1	Mali 23961	15356	0.27	550	5.1	28861	OOR >	4714	5581	1262	29737	OOR >	31513	OOR >	19242	94.8	396	2642	3150	7433	8763	275	1080	12580	10908	90	123	380	521	1104	25762	576	6128	1901	502	30398	27588	7816
239	23962	1	5	12	1	1	0	1	1	2015-04-17	1	Mali 23962	29901	2.04	164	1.9	25631	25.3	203	126	2012	25020	83.5	28155	OOR >	966	10.2	66	952	1601	1771	1308	53	1126	9220	7490	56	1597	113	328	87	7190	140	1828	67	71	297	224	131
239	23963	1	5	11	1	1	0	1	1	2015-04-17	1	Mali 23963	28151	0.97	121	1.4	24403	22.5	3762	158	228	27702	OOR >	30314	OOR >	7270	46	102	791	737	2157	2043	147	1342	13302	10473	64	104	332	275	233	6833	193	1942	151	187	5326	475	5932
239	23964	1	5	12	1	1	0	1	1	2015-04-17	1	Mali 23964	23454	0.48	436	4.2	24734	23.2	637	866	1180	31699	OOR >	30314	OOR >	31237	*136.0	278	2951	20040	5801	2395	615	5192	5192	3773	1404	386	2838	1681	964	27747	3169	2029	143	626	293	26057	272
239	23965	0	5	11	1	1	0	1	2	2015-04-17	1	Mali 23965	293	0.01	92	1	24407	22.6	644	672	320	27947	OOR >	30069	OOR >	2463	20.5	89	18148	12867	7287	3076	379	1790	10394	8911	67	293	234	693	662	15650	169	2954	37	39	136	25995	791
239	23966	1	6	12	1	1	0	0	1	2015-04-17	1	Mali 23966	26757	0.7	329	3.4	28581	OOR >	287	631	379	28891	OOR >	29871	OOR >	26435	*120.1	164	2389	1932	3499	1435	137	1925	6476	5460	139	69	259	723	736	2393	2390	1977	362	475	30192	8549	3171
239	23967	1	6	13	1	1	0	1	1	2015-04-17	1	Mali 23967	15799	0.28	166	1.9	26754	29.1	591	311	215	29513	OOR >	29495	OOR >	28696	*127.7	334	2491	20619	2113	1590	464	788	4477	3555	393	6176	301	767	142	5881	1872	945	1974	58	867	13986	981
274	27451	0	5	11	1	1	0	0	2	2015-04-17	1	Mali 27451	147	0.006	266	2.9	28770	OOR >	196	39	40	60	0.4	25959	66.6	58	1.1	229	247	19007	1352	977	73	575	201	181	48	81	266	128	109	268	179	130	46	37	11337	2854	94
274	27452	0	6	13	1	1	0	0	2	2015-04-17	1	Mali 27452	721	0.03	191	2.2	26382	27.6	232	1301	1373	31226	OOR >	30546	OOR >	30897	*134.9	194	2572	8139	1499	1016	255	1735	328	254	90	122	276	1169	367	1243	349	402	75	51	31204	11900	8413
274	27453	0	3	10	1	1	0	0	2	2015-04-17	1	Mali 27453	29553	1.68	121	1.4	27687	35.3	252	551	847	21255	63.9	547	3	654	7.6	322	758	218	7846	2163	119	908	338	202	85	124	407	1526	178	775	1385	213	57	47	4615	7973	431
274	27454	1	4	10	1	1	0	0	2	2015-04-17	1	Mali 27454	448	0.02	142	1.6	28307	49.8	725	243	167	28991	OOR >	31282	OOR >	28882	*128.3	241	11743	16667	25048	16138	126	2789	2589	1756	130	114	365	427	185	1057	417	1913	66	74	126	787	244
274	27455	0	4	10	1	1	0	0	2	2015-04-17	1	Mali 27455	31287	>2.39	282	3	27546	33.9	503	14290	687	27921	OOR >	31563	OOR >	815	9	118	5272	24951	5332	3175	191	1262	311	253	148	56	175	431	280	1077	311	1280	204	58	26858	25927	1646
274	27456	1	6	13	1	1	0	0	2	2015-04-17	1	Mali 27456	15063	0.26	50	0.4	27807	36.7	113	112	134	1596	10.3	694	3.6	141	2.4	108	156	993	14863	756	55	2531	328	134	47	49	135	113	90	324	87	147	38	33	16927	2868	189
274	27457	0	3	8	1	1	0	0	2	2015-04-17	1	Mali 27457	28947	1.34	171	2	26561	28.3	415	257	430	152	1.6	14914	38	94	1.7	94	360	2096	616	367	60	840	170	127	43	46	106	682	91	283	230	156	33	31	29331	7363	1667
274	27458	1	6	10	1	1	0	0	2	2015-04-17	2	Mali 27458	27324	0.76	177	2	28452	71.7	219	115	117	1411	9.4	31418	OOR >	392	5.2	281	3049	1177	3245	1156	181	744	291	171	140	91	321	220	192	1030	295	292	79	52	10167	1636	4480
274	27459	0	1	7	1	1	0	0	2	2015-04-17	2	Mali 27459	27297	0.76	118	1.4	28362	54.1	273	456	361	3945	19.5	800	4	3711	27.9	393	718	496	3700	3955	136	306	1084	716	76	118	526	91	178	333	230	517	69	62	26464	1994	28335
274	27460	1	2		1	1	0	0	2	2015-04-17	2	Mali 27460	28071	0.86	36	OOR <	27906	38.1	38	150	116	2414	13.8	30537	OOR >	1455	13.9	51	2774	27840	6397	1797	56	255	164	85	53	23	71	89	45	350	92	143	19	24	31356	16439	5626
274	27461	0	2		1	1	0	1	2	2015-04-17	2	Mali 27461	27553	0.79	58	0.5	29736	OOR >	255	298	360	4215	20.4	4669	15.6	132	2.2	79	20616	19914	9982	6810	64	2669	318	125	64	26	139	175	91	518	106	225	29	20	31492	25496	25431
274	27462	1	3	11	1	1	0	1	2	2015-04-17	2	Mali 27462	19143	0.34	103	1.2	29069	OOR >	168	213	408	7502	30.5	2860	10.7	1858	16.7	160	2367	2402	5074	9765	94	19775	529	299	57	55	197	519	124	615	247	354	156	635	27077	10860	350
274	27463	1	2		1	1	1	1	3	2015-04-17	2	Mali 27463	30133	2.09	163	1.9	30106	OOR >	130	576	292	119	1.3	27589	OOR >	121	2.1	603	2155	20784	12189	5385	255	506	476	292	111	236	692	373	321	692	389	422	129	90	165	25518	308
274	27464	0	3	11	1	1	0	0	2	2015-04-17	2	Mali 27464	6131	0.15	307	3.2	28721	OOR >	425	1624	499	21585	64.7	31444	OOR >	483	6.1	288	1567	1680	2353	2303	258	542	367	232	87	78	291	423	147	875	403	260	160	237	29359	24189	4131
274	27465	0	5	11	1	1	1	1	3	2015-04-17	2	Mali 27465	28955	1.45	109	1.3	28170	43.8	122	133	39	6188	26.7	27260	OOR >	199	3.1	193	2394	3609	17110	8038	90	974	423	383	70	69	241	115	4266	534	144	460	1026	115	70	24284	119
274	27466	1	3	7	1	1	0	0	2	2015-04-17	2	Mali 27466	2965	0.1	175	2	29260	OOR >	714	45	66	1896	11.6	28455	OOR >	205	3.1	291	313	1901	13092	5042	98	1293	305	179	79	89	343	118	140	326	236	286	52	72	26670	682	1823
274	27467	1	1	7	1	1	0	0	2	2015-04-17	2	Mali 27467	18336	0.31	224	2.5	29608	OOR >	122	422	521	24950	81.9	31526	OOR >	782	8.7	703	1249	2182	9618	4434	246	706	487	346	136	205	805	514	403	691	741	413	96	86	10897	708	993
274	27468	0	3	11	1	1	0	0	2	2015-04-17	2	Mali 27468	25247	0.56	266	2.9	28140	43	144	157	241	30137	OOR >	31348	OOR >	14858	78.3	250	1329	291	1708	626	155	558	243	179	401	93	258	295	388	636	259	234	83	62	7461	1864	1545
274	27469	0	5	10	1	1	0	0	2	2015-04-17	2	Mali 27469	8799	0.19	62	0.6	27775	36.3	971	310	525	319	3.1	5154	16.8	318	4.4	151	140	697	859	1670	85	4631	203	134	53	62	207	303	103	280	159	282	37	29	27722	3877	2790
274	27470	0	3	11	1	1	0	0	2	2015-04-17	2	Mali 27470	23552	0.46	133	1.5	28666	OOR >	1876	134	154	29965	OOR >	31458	OOR >	14391	76.4	248	942	3421	9191	1744	160	652	340	225	132	119	377	540	214	360	370	280	111	280	30115	10318	1753
306	30650	0	5	10	1	1	0	1	2	2015-04-17	2	Mali 30650	28553		161	1.9	27132	31	645	25358	5846	26235	OOR >	31417	OOR >	29911	*131.6	371	26433	23239	23030	14408	26552	5662	3059	2278	190	111	20094	28323	29986	450	4101	1690	94	99	31686	26028	20494
306	30651	0	6	10	1	1	0	1	2	2015-04-17	2	Mali 30651	3288	0.11	244	2.7	23790	21.5	89	76	226	646	5.3	30149	OOR >	377	5	61	12404	999	19942	15675	51	1290	1362	450	88	41	124	267	325	796	412	194	96	60	31219	24526	5348
306	30652	1	3	10	1	1	1	1	3	2015-04-17	2	Mali 30652	610	0.02	171	2	29190	OOR >	582	202	220	27935	OOR >	27610	OOR >	1783	16.1	510	11492	19271	25774	16555	266	750	708	277	186	202	639	542	417	520	3647	375	115	1710	25933	19283	5108
306	30653	1	4	10	1	1	1	1	3	2015-04-17	2	Mali 30653	1904	0.07	121	1.4	29307	OOR >	370	326	423	30174	OOR >	28516	OOR >	306	4.3	261	3120	19505	5769	3488	152	1036	550	323	95	147	336	763	267	378	661	429	55	50	30526	25332	21053
306	30654	0	4	12	1	1	1	1	3	2015-04-17	2	Mali 30654	1809	0.07	95	1.1	29855	OOR >	32	249	190	25659	OOR >	305	1.9	110	1.9	62	350	966	28132	24081	46	386	804	219	65	33	91	96	89	259	95	325	24	75	84	28034	121
306	30655	0	3	10	1	1	1	1	3	2015-04-17	2	Mali 30655	16386	0.29	679	5.9	28922	OOR >	3777	370	336	30986	OOR >	30723	OOR >	30118	*132.3	262	265	3068	1233	1278	121	1477	1729	1509	168	94	525	275	288	502	373	849	59	94	5037	456	2031
306	30656	1	2	5	1	1	0	0	2	2015-04-17	2	Mali 30656	29999	2.04	336	3.5	29672	OOR >	940	1326	1121	31173	OOR >	31237	OOR >	30914	*134.9	475	4871	6856	26274	10276	228	618	799	456	148	212	699	1018	379	580	739	469	101	223	31462	27721	8310
306	30657	0	2	7	1	1	1	1	3	2015-04-17	2	Mali 30657	22760	0.43	225	2.5	28332	51.6	211	373	419	30101	OOR >	30857	OOR >	776	8.7	721	545	232	21546	22668	266	760	567	326	177	243	824	284	337	412	616	407	143	281	16156	23680	1795
306	30658	0	5	11	1	1	0	1	2	2015-04-17	2	Mali 30658	7933	0.18	211	2.4	29977	OOR >	123	289	383	29335	OOR >	28863	OOR >	440	5.6	151	26293	30080	14318	6198	107	374	510	266	76	158	494	183	206	372	236	493	41	44	31311	17174	9870
306	30659	0	3	10	1	1	1	1	3	2015-04-17	2	Mali 30659	780	0.03	83	0.9	27922	38.4	8729	427	239	5487	24.5	28072	OOR >	170	2.7	210	608	704	4810	3153	115	404	232	154	62	163	266	273	145	483	163	167	46	48	7627	1330	6521
306	30660	0	2	8	1	1	1	1	3	2015-04-17	2	Mali 30660	19135	0.33	87	1	24993	23.7	36	91	190	716	5.8	23965	56.6	830	9.1	81	1047	1053	11858	1684	77	236	191	77	75	29	137	131	100	317	102	78	34	26	7814	2371	308
306	30661	1	3	8	1	1	1	1	3	2015-04-17	2	Mali 30661	13951	0.24	176	2	29395	OOR >	397	713	534	20046	61	29939	OOR >	505	6.3	344	6623	2023	29459	25601	186	915	3911	2626	170	141	449	677	475	565	360	2274	124	137	28566	26494	27293
306	30662	1	4	9	1	1	1	1	3	2015-04-17	2	Mali 30662	31070	>2.39	202	2.3	29061	OOR >	990	6869	241	29020	OOR >	29958	OOR >	6633	43	764	4991	1354	12561	3730	300	3848	627	381	189	245	4932	301	475	601	499	405	119	190	5799	550	14054
306	30663	1	4	10	1	1	1	1	3	2015-04-17	2	Mali 30663	30331	>2.39	175	2	29543	OOR >	91	624	793	677	5.5	418	2.4	196	3	743	2721	3566	24554	10229	292	531	916	467	132	257	895	176	342	462	416	586	339	207	24423	17541	519
306	30664	0	4	10	1	1	1	1	3	2015-04-17	2	Mali 30664	117	0.005	57	0.5	25975	26.2	165	127	136	8484	33.3	27004	OOR >	12170	67.5	21	244	429	14924	2214	164	246	205	85	28	97	95	201	228	793	92	125	248	815	30912	25503	218
306	30665	1	4	10	1	1	1	1	3	2015-04-17	2	Mali 30665	324	0.011	93	1.1	29175	OOR >	92	177	217	26821	OOR >	755	3.8	437	5.6	208	337	1543	13183	7882	128	398	316	183	90	79	221	251	167	358	222	232	47	35	181	27406	628
306	30666	0	4	12	1	1	1	1	3	2015-04-17	2	Mali 30666	30849	>2.39	68	0.7	27473	33.3	121	79	150	26067	OOR >	29799	OOR >	124	2.1	107	1279	1572	6925	3866	75	371	264	159	146	199	300	208	453	350	132	200	50	74	25365	3134	7180
306	30667	0	6	12	1	1	0	1	2	2015-04-17	2	Mali 30667	19780	0.35	1090	8.5	13844	10.7	199	208	65	27087	OOR >	29671	OOR >	1107	11.3	119	1865	4864	7087	2852	83	323	177	142	153	47	168	303	1102	390	156	165	42	40	14271	24150	4709
306	30668	0	6	12	1	1	1	1	3	2015-04-17	2	Mali 30668	1971	0.07	991	7.9	28595	OOR >	551	418	495	31707	OOR >	31190	OOR >	31491	*136.8	232	29277	29978	3620	2537	104	651	346	209	141	1149	1924	284	186	407	1177	242	94	340	31451	15154	1966
306	30669	1	6	12	1	1	1	1	3	2015-04-17	2	Mali 30669	157	0.006	27250	117.1	28733	OOR >	380	308	422	26196	OOR >	23930	56.5	187	2.9	217	4252	2609	11743	9521	98	486	422	259	243	148	289	250	146	353	225	241	120	52	30108	19043	6767
362	36250	0	5	13	1	1	0	1	2	2015-04-17	2	Mali 36250	23650	0.47	132	1.5	27818	36.9	62	246	332	18828	58.2	30367	OOR >	69	1.3	341	364	727	2533	5195	120	412	353	177	107	108	383	264	198	2341	267	284	60	106	29977	23449	4361
362	36251	0	6	14	1	1	1	1	3	2015-04-17	2	Mali 36251	1481	0.05	668	5.9	27288	32	109	57	67	27271	OOR >	3176	11.6	184	2.9	97	939	203	1813	3550	90	412	245	110	51	37	125	89	249	3520	450	146	52	176	20568	5192	481
362	36252	0	1		1	1	1	1	3	2015-04-17	2	Mali 36252	10010	0.19	138	1.6	27272	31.9	97	17130	22139	28351	OOR >	30826	OOR >	208	3.2	450	228	563	14217	8115	346	519	510	241	155	135	937	416	230	552	446	252	78	65	865	1103	422
362	36253	1	1		1	1	0	0	2	2015-04-17	2	Mali 36253	8190	0.18	132	1.5	27195	31.4	2257	180	339	30588	OOR >	29852	OOR >	29481	*130.2	479	468	1339	25640	23567	410	677	750	271	174	309	1110	415	851	540	361	378	209	319	30882	26030	17483
362	36254	0	4	10	1	1	0	1	2	2015-04-17	2	Mali 36254	9867	0.19	153	1.8	28000	39.7	186	1355	1215	30260	OOR >	25164	60.9	30245	*132.7	306	490	4484	6111	7564	240	960	348	302	194	175	612	279	446	27638	611	296	67	61	16028	22844	275
362	36255	1	5	11	1	1	0	0	2	2015-04-17	2	Mali 36255	29088	1.4	84	0.9	27588	34.3	1359	121	171	4044	19.8	29787	OOR >	9653	56.8	95	325	783	2747	2096	129	797	254	136	60	23	106	744	104	8874	335	654	79	219	23782	11410	1399
362	36256	0	5	14	1	1	0	0	1	2015-04-17	2	Mali 36256	181	0.007	141	1.6	26081	26.6	141	77	96	6537	27.7	29214	OOR >	1925	17.1	156	764	278	13128	7832	80	355	315	88	73	66	567	270	6229	2148	604	134	100	410	30908	9513	3929
362	36257	1	1		1	1	0	1	2	2015-04-17	2	Mali 36257	2275	0.08	289	3.1	29565	OOR >	197	1234	1809	29795	OOR >	31090	OOR >	27886	*125.0	690	5779	8113	26192	20208	265	722	808	436	181	211	814	374	367	722	589	424	148	216	31334	28127	24009
362	36258	0	5	15	1	1	0	1	2	2015-04-17	2	Mali 36258	13817	0.25	160	1.8	28033	40.4	74	4941	140	392	3.7	7586	22.6	424	5.5	247	321	2276	786	774	116	416	838	569	107	11040	517	173	295	2856	267	383	63	156	29979	16398	2085
362	36259	1	3		1	1	1	1	3	2015-04-17	2	Mali 36259	16688	0.29	85	1	27945	38.7	85	1638	1707	8558	33.5	1646	7	149	2.4	84	621	171	1411	859	95	380	261	181	70	54	123	134	166	249	82	227	24	45	26339	7368	1196
362	36260	1	5	13	1	1	1	1	2	2015-04-22	1	Mali 36260	28420	1.07	182	2.1	26221	27	1058	217	334	4967	22.9	344	2.1	807	8.9	82	1282	1044	5243	5563	248	1668	218	147	102	162	213	710	320	7546	1594	190	31	266	21669	558	731
362	36261	1	5	11	1	1	0	1	2	2015-04-22	1	Mali 36261	2257	0.08	142	1.7	23487	21	80	250	261	31523	OOR >	31679	OOR >	31357	*136.3	86	188	11123	7643	3453	55	868	236	170	79	52	173	373	98	1199	223	157	58	55	31298	26888	4069
362	36262	1	5	11	1	1	1	1	3	2015-04-22	1	Mali 36262	28705	1.17	160	1.8	29792	OOR >	5729	1144	1511	7985	31.9	31467	OOR >	3522	26.8	284	2780	5197	2846	1501	130	1446	476	392	163	101	462	617	6526	5155	1117	777	250	265	31655	28523	13142
362	36263	1	3		1	1	1	0	3	2015-04-22	1	Mali 36263	25651	0.57	165	1.9	29149	OOR >	857	4985	6586	31172	OOR >	31140	OOR >	29871	*131.5	378	16232	14365	24602	3702	117	938	417	225	116	175	645	632	317	984	353	344	76	60	31867	24707	17160
395	39550	1	6		1	1	0	0	2	2015-04-22	1	Mali 39550	27326	0.75	404	4	27854	37.3	11581	301	232	31738	OOR >	29345	OOR >	31610	*137.2	170	5487	23153	2586	1871	74	2683	356	246	733	187	314	335	153	599	1418	293	44	52	28834	13577	1379
395	39551	1	5	12	1	1	1	1	3	2015-04-22	1	Mali 39551	23913	0.49	61	0.6	28891	OOR >	487	314	416	3416	17.6	26789	OOR >	681	7.9	54	2065	8424	3043	2149	180	584	148	130	78	133	220	246	303	445	498	231	85	123	31423	18051	5217
395	39552	1	5	12	1	1	1	1	3	2015-04-22	1	Mali 39552	4687	0.14	107	1.2	23439	20.9	731	95	109	28315	OOR >	29974	OOR >	5124	35.5	55	1351	7957	6483	2670	57	763	134	101	75	45	95	235	64	393	591	169	61	49	31538	25905	24332
395	39553	1	2	10	1	1	1	1	3	2015-04-22	1	Mali 39553	23749	0.47	166	1.9	30145	OOR >	326	1204	1365	10526	38.7	29090	OOR >	1806	16.3	534	5541	2058	9256	8019	222	848	371	291	143	261	867	553	361	572	601	368	145	119	31584	27774	6584
395	39554	0	4		1	1	1	1	3	2015-04-22	1	Mali 39554	30113	2.14	106	1.2	27991	39.5	5551	951	774	31070	OOR >	31082	OOR >	29289	*129.6	305	1971	5082	16982	6121	214	1578	471	350	126	205	505	323	270	439	231	491	135	71	24121	21708	30735
395	39555	0	5		1	1	1	1	3	2015-04-22	1	Mali 39555	4682	0.14	152	1.8	29280	OOR >	4734	878	943	1658	10.6	323	2	325	4.5	412	969	469	25153	10597	214	922	1963	1263	118	235	633	352	288	443	251	776	69	60	31703	28915	25119
395	39556	1	5		1	1	1	1	3	2015-04-22	1	Mali 39556	28542	1.11	121	1.4	29554	OOR >	210	859	762	11065	40	28467	OOR >	2418	20.3	646	5966	3030	4677	1339	172	1561	528	377	130	300	996	632	232	553	456	537	301	126	31203	24923	7317
395	39557	1	6	11	1	1	1	1	3	2015-04-22	1	Mali 39557	26002	0.61	183	2.1	27996	39.6	206	171	421	322	3.1	30657	OOR >	101	1.8	121	3075	2900	2145	4024	136	302	318	223	101	144	226	636	133	585	304	575	401	90	24020	7463	2454
395	39558	0	1		1	1	0	0	1	2015-04-22	1	Mali 39558	103	0.005	65	0.7	-365	OOR <	392	165	250	1209	8.4	26194	70.6	490	6.1	27	12156	8671	14436	5072	34	-16	123	129	48	35	131	173	38	712	83	80	12	15	81	26869	129
395	39559	1	4	12	1	1	0	1	2	2015-04-22	1	Mali 39559	29436	1.65	172	2	443	*0.2	5983	402	489	29101	OOR >	29061	OOR >	17486	88.3	105	312	4476	5526	3159	92	593	148	87	120	59	208	307	118	677	254	123	3272	43	31025	8887	25799
395	39560	1	3		1	1	1	1	3	2015-04-22	1	Mali 39560	20698	0.38	56	0.5	26704	28.9	104	465	235	28822	OOR >	29123	OOR >	861	9.4	227	868	4914	24635	14941	143	4521	431	200	97	80	283	103	160	463	142	911	88	59	26251	25356	2441
395	39561	1	1		1	1	0	1	2	2015-04-22	1	Mali 39561	27004	0.72	86	1	27795	36.6	3886	128	144	11783	41.8	26648	OOR >	15503	80.8	104	776	1924	26054	18106	50	1143	392	181	97	51	911	155	58	368	94	230	31	42	29872	25465	4492
395	39562	1	4		1	1	0	1	2	2015-04-22	1	Mali 39562	29978	2.09	123	1.4	28208	45.1	14839	3845	492	30481	OOR >	30496	OOR >	29302	*129.6	195	1298	2487	8009	1986	74	3088	349	210	135	97	307	111	89	397	378	255	51	43	5763	475	1556
395	39563	0	6	14	1	1	1	1	3	2015-04-22	1	Mali 39563	27351	0.77	136	1.6	23452	20.9	4967	293	517	27204	OOR >	30420	OOR >	3658	27.6	105	6904	9359	11026	6732	58	1055	241	187	121	59	221	168	1120	369	187	250	165	145	30696	24982	5508
395	39564	1	4		1	1	1	1	3	2015-04-22	1	Mali 39564	26635	0.66	902	7.3	25211	24.2	299	2343	2424	27060	OOR >	30211	OOR >	24303	*112.8	495	23845	26213	9681	4229	180	1027	404	304	141	187	791	268	200	644	512	438	106	133	30336	15778	26345
395	39565	1	5		1	1	1	1	3	2015-04-22	1	Mali 39565	30833	>2.39	183	2.1	28976	OOR >	568	218	276	24034	73.3	29820	OOR >	6484	42.2	794	3290	19027	4577	3448	198	442	453	320	147	365	1482	405	337	443	417	444	142	113	29348	24266	13418
395	39566	0	3		1	1	0	0	2	2015-04-22	1	Mali 39566	767	0.03	756	6.4	29037	OOR >	316	161	295	10389	38.3	6729	20.6	355	4.8	144	860	2463	25260	4695	69	565	1021	687	65	67	262	156	76	311	236	612	423	247	27835	8536	2386
395	39567	0	5		1	1	0	0	1	2015-04-22	1	Mali 39567	29179	1.47	82	0.9	1023	0.5	249	80	112	26038	OOR >	28725	OOR >	458	5.8	30	922	550	3708	2098	29	759	95	57	65	21	97	225	108	679	109	80	4	13	31174	23398	1158
395	39568	0	5		1	1	0	0	2	2015-04-22	1	Mali 39568	2982	0.11	81	0.9	26732	29	605	341	361	2740	15.1	28203	OOR >	664	7.7	184	5355	7700	17699	5258	66	715	262	168	72	83	312	72	67	364	205	310	41	1283	31035	27195	18418
395	39569	0	4	13	1	1	1	1	3	2015-04-22	1	Mali 39569	7448	0.17	97	1.1	1186	0.6	916	147	177	3703	18.6	30855	OOR >	69	1.3	44	442	744	11119	1726	267	978	103	54	39	188	207	343	410	455	41	60	12	457	1991	252	2939
400	40050	0	3		1	1	0	0	2	2015-04-22	1	Mali 40050	1335	0.05	124	1.4	28960	OOR >	244	1008	619	28697	OOR >	30332	OOR >	142	2.4	182	990	2326	6545	4317	92	1201	335	138	110	117	326	204	106	269	253	255	49	54	28147	21892	820
400	40051	1	6		1	1	1	1	3	2015-04-22	1	Mali 40051	24732	0.53	193	2.2	26257	27.1	144	1089	257	26575	OOR >	28185	OOR >	136	2.3	72	23922	24019	5987	2488	95	2170	268	149	90	78	654	306	154	431	181	179	14	22	8377	409	270
400	40052	1	6		1	1	0	0	2	2015-04-22	1	Mali 40052	144	0.005	104	1.2	1125	0.6	342	2553	196	27130	OOR >	24025	56.7	7472	46.9	180	2589	6923	24380	17242	330	7411	304	147	101	281	402	476	472	554	206	153	1842	2403	27887	21515	3249
400	40053	1	6	12	1	1	1	1	3	2015-04-22	1	Mali 40053	23558	0.48	63	0.6	70	OOR <	103	305	575	27731	OOR >	30493	OOR >	8763	52.9	41	1095	9666	7424	1566	98	235	116	89	79	23	328	248	70	536	254	117	11	16	28236	25195	2304
400	40054	1	5		1	1	1	1	3	2015-04-22	1	Mali 40054	2578	0.09	126	1.5	22696	19.8	648	1509	1844	31286	OOR >	29826	OOR >	30797	*134.5	79	1272	22018	21975	7672	62	8856	328	183	102	63	152	319	487	617	775	190	2054	1037	24823	27735	2200
400	40055	1	6	17	1	1	1	1	3	2015-04-22	1	Mali 40055	26547	0.67	144	1.7	27877	37.7	93	149	77	4681	22	17044	42.1	1858	16.7	80	3839	728	4865	2482	57	695	4077	3441	60	50	221	129	98	288	105	3497	32	24	29880	24751	5457
400	40056	0	1		1	1	0	0	2	2015-04-22	1	Mali 40056	1159	0.04	149	1.7	29701	OOR >	392	312	325	27211	OOR >	28868	OOR >	172	2.7	698	8377	13047	26499	13888	182	2157	546	410	133	364	1157	175	225	445	398	432	145	116	160	213	211
400	40057	1	2		1	1	0	1	2	2015-04-22	1	Mali 40057	1584	0.06	456	4.4	2951	1.9	8870	393	402	10336	38.2	30465	OOR >	1076	11.1	47	1254	4716	21650	21511	232	3559	290	134	386	267	243	548	1307	984	958	920	34	124	30597	28485	24464
400	40058	0	2	6	1	1	0	0	2	2015-04-22	1	Mali 40058	239	0.01	170	1.9	24993	23.7	1677	163	164	2495	14.1	88	0.7	186	2.9	229	255	5054	17803	4802	144	1132	271	206	66	165	504	208	410	377	176	141	29	3044	28101	9482	2960
400	40059	1	6		1	1	0	1	1	2015-04-22	1	Mali 40059	30469	>2.39	42	0.2	1221	0.7	591	235	170	31145	OOR >	31052	OOR >	30717	*134.3	50	186	1508	1478	688	109	8352	330	241	80	63	124	215	223	297	75	144	12	21	21100	8643	9121
400	40060	1	2		1	1	1	1	3	2015-04-22	1	Mali 40060	168	0.006	47	0.3	1350	0.8	1661	23530	296	30133	OOR >	28589	OOR >	30199	*132.6	28	3276	2085	10050	7229	54	994	258	172	63	40	113	130	59	172	1081	159	10	44	402	1411	709
400	40061	0	2		1	1	1	1	3	2015-04-22	1	Mali 40061	26882	0.69	57	0.5	-206	OOR <	7626	246	418	27655	OOR >	30212	OOR >	9162	54.6	37	4301	2214	24137	14035	54	337	298	207	117	35	54	184	48	321	76	723	1600	39	127	1320	35
400	40062	0	2	8	1	1	1	0	3	2015-04-22	1	Mali 40062	388	0.02	99	1.1	26518	28.1	342	153	105	26862	OOR >	22518	52.9	571	6.9	201	3275	4854	24177	17547	120	751	374	194	99	98	244	136	342	441	170	306	30	42	30734	25777	5369
400	40063	0	6		1	1	1	1	3	2015-04-22	1	Mali 40063	29208	1.32	66	0.7	16524	13	269	136	195	31030	OOR >	30409	OOR >	30243	*132.7	66	1624	5042	4104	1706	43	2107	172	120	133	48	115	48	58	324	960	215	28	44	30861	11356	3095
400	40064	0	4	9	1	1	1	1	3	2015-04-22	1	Mali 40064	16656	0.28	117	1.4	27237	31.6	389	456	648	23849	72.3	29022	OOR >	24734	*114.3	87	23943	27244	23402	10704	62	1350	205	144	76	66	132	201	139	318	147	191	54	41	29090	23729	3204
400	40065	0	6		1	1	0	1	2	2015-04-22	1	Mali 40065	2210	0.08	584	5.3	6244	4.4	589	3228	269	24643	77.7	30346	OOR >	5719	38.5	75	252	9336	17659	6017	70	2522	149	64	172	32	94	283	168	300	696	93	27	42	30064	24521	2885
400	40066	0	2		1	1	1	0	2	2015-04-22	1	Mali 40066	25408	0.57	184	2.1	1257	0.7	1100	2711	3011	25756	OOR >	31201	OOR >	469	5.9	47	865	9850	26917	15960	58	1188	403	277	99	70	216	112	86	1163	290	318	38	1227	28815	26783	2715
400	40067	0	2		1	1	1	1	3	2015-04-22	1	Mali 40067	2468	0.09	321	3.3	26065	26.5	128	4320	1310	26449	OOR >	30653	OOR >	17377	87.9	224	310	5455	24262	19834	206	1556	307	197	295	54	1246	283	259	667	721	273	66	79	570	24945	376
400	40068	0	2		1	1	1	1	3	2015-04-22	1	Mali 40068	212	0.01	59	0.5	25167	24.1	2858	75	209	332	3.2	5346	17.3	80	1.5	62	397	6019	8886	2529	35	1519	154	79	94	39	109	173	181	430	121	125	15	19	30036	26862	539
400	40069	1	6		1	1	1	1	3	2015-04-22	2	Mali 40069	28570	1.2	131	1.5	30647	OOR >	762	1244	21440	32587	OOR >	13290	34.8	32213	*139.1	146	9004	24219	23709	9274	146	804	526	220	135	99	309	294	167	1026	217	331	54	67	2304	335	338
428	42850	0	3	10	1	1	1	1	3	2015-04-22	2	Mali 42850	31820	>2.39	656	5.8	29937	OOR >	556	12985	485	31904	OOR >	32410	OOR >	7212	45.7	418	3441	2607	4589	5041	181	4653	372	303	192	408	568	569	357	772	1791	2314	114	96	5211	29561	1408
428	42851	0	1	6	1	1	1	1	2	2015-04-22	2	Mali 42851	31542	>2.39	184	2.1	30994	OOR >	30375	3658	3084	32661	OOR >	32620	OOR >	32646	*140.5	179	4598	4614	29040	25614	123	1167	534	305	235	105	290	1699	437	1036	1272	372	82	60	32207	28852	5537
428	42852	0	3	8	1	1	0	1	2	2015-04-22	2	Mali 42852	2556	0.1	459	4.4	426	*0.1	29961	1261	504	32527	OOR >	32618	OOR >	1717	15.7	119	1142	28829	22121	13624	102	1012	631	155	248	66	471	691	759	1253	2404	411	116	107	29780	29635	2145
428	42853	1	3	8	1	1	1	1	3	2015-04-22	2	Mali 42853	28412	1.04	255	2.8	31725	OOR >	4960	168	628	32598	OOR >	32399	OOR >	8367	51.1	611	26740	31867	31031	29885	215	1965	1015	622	220	192	844	592	254	797	517	1467	123	94	32629	29880	10969
428	42854	0	1		1	1	0	1	2	2015-04-22	2	Mali 42854	15800	0.28	91	1	30192	OOR >	5490	1112	1624	31623	OOR >	30933	OOR >	146	2.4	108	651	3770	30060	29544	1354	544	562	170	81	67	222	182	152	496	112	262	22	30	32272	26877	10648
428	42855	0	3		1	1	1	1	3	2015-04-22	2	Mali 42855	25045	0.54	205	2.3	30675	OOR >	32204	5321	3605	30759	OOR >	32072	OOR >	126	2.2	120	337	13842	17720	2526	63	2528	3300	2306	130	47	201	240	84	516	173	3041	34	45	85	24420	278
428	42856	1	5	13	1	1	0	1	2	2015-04-22	2	Mali 42856	31518	>2.39	249	2.7	31362	OOR >	30390	4947	428	32475	OOR >	32547	OOR >	31676	*137.4	786	871	3145	8301	4489	213	1306	9845	6810	182	358	1054	375	254	7245	532	2515	154	139	208	29171	425
428	42857	0	1		1	1	0	1	2	2015-04-22	2	Mali 42857	25286	0.55	1408	10.2	31167	OOR >	32105	3369	1864	32305	OOR >	32589	OOR >	27768	*124.6	440	11435	26715	29797	27968	193	4579	859	306	273	191	1053	1102	462	1139	2519	425	111	96	32629	27410	2164
428	42858	0	1		1	1	1	1	3	2015-04-22	2	Mali 42858	1905	0.07	259	2.8	1306	0.7	32551	885	845	31879	OOR >	32590	OOR >	15549	81	214	1138	9410	28663	14266	3178	2627	401	209	260	85	433	21168	14751	1211	927	355	217	70	32507	10826	1055
428	42859	0	2	6	1	1	1	1	3	2015-04-22	2	Mali 42859	27199	0.76	235	2.6	27626	34.7	4684	1721	518	31902	OOR >	32604	OOR >	323	4.5	353	26977	7362	16594	4548	131	1114	330	263	174	127	564	448	897	704	494	303	2061	435	32518	16515	1297
428	42860	0	1		1	1	0	1	2	2015-04-22	2	Mali 42860	11738	0.22	263	2.8	31141	OOR >	6961	1813	1104	30695	OOR >	29195	OOR >	389	5.1	929	4549	1062	28282	17976	302	533	1088	516	218	393	7303	368	516	3490	1051	649	633	857	32439	19354	2064
428	42861	0	2	7	1	1	0	1	2	2015-04-22	2	Mali 42861	17844	0.32	126	1.5	31228	OOR >	803	208	574	20148	61.2	31543	OOR >	11739	65.7	150	10535	25263	22527	6648	83	2249	973	688	88	74	903	731	160	1276	386	560	54	67	32501	29057	1916
428	42862	0	3	10	1	1	0	1	2	2015-04-22	2	Mali 42862	22723	0.44	219	2.4	28023	40.2	237	195	2811	17089	54.2	31610	OOR >	1697	15.6	111	962	1290	5102	2608	106	1859	203	113	565	117	157	338	108	623	2203	210	64	54	1459	899	551
428	42863	1	2		1	1	0	1	2	2015-04-22	2	Mali 42863	2962	0.11	282	3	31101	OOR >	3025	172	1787	31645	OOR >	32100	OOR >	28210	*126.0	557	2034	1539	30457	28161	270	2462	583	267	211	258	812	525	432	666	429	361	107	248	32450	26209	26945
428	42864	0	2		1	1	0	1	2	2015-04-22	2	Mali 42864	5080	0.14	314	3.3	31263	OOR >	32154	370	499	28266	OOR >	32521	OOR >	2518	20.9	474	6627	22033	30217	27023	275	1325	834	542	261	183	975	1522	646	878	744	499	121	2252	32589	29254	3816
428	42865	1	5	13	1	1	0	1	2	2015-04-22	2	Mali 42865	861	0.03	202	2.3	30714	OOR >	332	203	388	31977	OOR >	25849	65.4	26787	*121.3	132	6551	758	1553	2258	74	626	742	368	124	86	250	616	111	14337	228	197	80	56	32385	30393	8998
428	42866	1	5		1	1	1	1	3	2015-04-22	2	Mali 42866	31438	>2.39	389	3.9	30493	OOR >	8808	1011	2043	32490	OOR >	32609	OOR >	31969	*138.3	431	3571	7693	24615	13952	361	920	880	435	233	114	1127	769	452	10841	1703	421	165	113	6416	708	1027
428	42867	1	3	10	1	1	1	1	2	2015-04-22	2	Mali 42867	28037	0.9	91	1	569	*0.2	626	219	1432	16217	52.3	32484	OOR >	1497	14.2	40	17762	30552	8969	2445	43	496	186	148	110	40	74	429	279	3698	195	739	104	40	29762	1227	1976
428	42868	0	2		1	1	1	1	3	2015-04-22	2	Mali 42868	30921	>2.39	101	1.2	45	OOR <	5111	309	511	29138	OOR >	31396	OOR >	1311	12.8	39	4748	25200	26766	2824	82	490	2103	1402	69	62	198	211	194	352	119	1156	21	26	32578	9945	2240
428	42869	1	2		1	1	1	1	3	2015-04-22	2	Mali 42869	6345	0.16	74	0.8	28306	49.8	774	6095	1318	18819	58.1	32487	OOR >	206	3.2	79	211	29231	5433	5277	51	722	224	136	85	38	1143	150	130	5888	616	155	34	35	32498	8933	8552
494	49450	0	1		1	1	0	1	2	2015-04-22	2	Mali 49450	5688	0.15	280	3	29851	OOR >	1346	398	901	18820	58.1	29651	OOR >	9151	54.6	187	1290	3026	8232	8697	86	2996	334	157	141	68	287	596	130	8936	573	263	61	59	32477	31289	22294
494	49451	1	4		1	1	0	1	2	2015-04-22	2	Mali 49451	3663	0.12	66	0.7	29594	OOR >	251	50	156	25079	85.2	32041	OOR >	1192	12	36	345	394	3304	2518	219	4176	97	51	48	137	181	334	293	296	99	263	35	32	75	29775	62
494	49452	0	5	12	1	1	0	1	2	2015-04-22	2	Mali 49452	7614	0.17	182	2.1	23271	20.6	273	702	178	32135	OOR >	32193	OOR >	31741	*137.6	122	2370	3373	16992	4279	97	1272	254	143	210	48	579	538	180	11700	983	166	70	82	23631	14255	521
494	49453	0	3	12	1	1	0	1	2	2015-04-22	2	Mali 49453	27313	0.77	193	2.2	469	*0.2	27302	159	254	4807	22.4	31066	OOR >	1851	16.6	44	1634	3687	12752	5860	63	378	272	159	95	26	167	440	99	2848	554	195	196	79	32419	26433	14888
494	49454	1	4		1	1	0	1	2	2015-04-22	2	Mali 49454	187	0.006	279	3	560	*0.2	147	72	257	30632	OOR >	31387	OOR >	820	9	36	386	14006	819	523	51	405	49	48	56	14	63	135	78	3233	216	42	32	38	29057	18354	284
494	49455	1	5	10	1	1	0	1	2	2015-04-22	2	Mali 49455	4389	0.13	467	4.5	28532	OOR >	279	1681	878	32427	OOR >	31533	OOR >	32162	*138.9	128	10475	29855	3919	4288	167	7239	177	118	113	121	397	755	181	1603	383	173	99	51	28992	20358	1914
494	49456	0	1	7	1	1	0	1	2	2015-04-22	2	Mali 49456	16879	0.3	99	1.1	28104	42	375	209	298	473	4.2	31962	OOR >	216	3.3	157	376	168	5574	2848	80	287	285	148	65	66	235	215	128	194	286	141	56	61	30089	10332	1066
494	49457	1	3		1	1	0	1	2	2015-04-22	2	Mali 49457	3294	0.11	57	0.5	29635	OOR >	145	108	165	124	1.3	29861	OOR >	33	0.7	90	607	1472	577	944	44	306	114	63	76	28	137	983	86	7697	478	94	36	40	12358	19339	8655
494	49458	1	6	13	1	1	0	1	2	2015-04-22	2	Mali 49458	31052	>2.39	543	5	2555	1.6	437	596	95	32380	OOR >	32169	OOR >	32356	*139.6	155	2484	31244	835	991	193	1206	199	170	172	77	374	566	502	779	523	335	207	120	18735	2756	20301
494	49459	0	6	13	1	1	0	1	2	2015-04-22	2	Mali 49459	140	0.006	90	1	29091	OOR >	125	453	1145	31622	OOR >	23288	54.8	149	2.5	80	954	1471	4649	1792	97	1113	141	120	160	44	130	493	90	8474	2999	113	39	44	31409	16620	2878
494	49460	1	1		1	1	0	1	2	2015-04-22	2	Mali 49460	133	0.006	50	0.4	16876	13.4	137	57	80	8361	32.9	20252	48.2	521	6.4	44	132	160	4046	2654	134	765	586	388	67	88	127	193	184	438	63	459	29	29	1084	58	3488
494	49461	0	4	10	1	1	0	1	2	2015-04-22	2	Mali 49461	3413	0.11	71	0.8	471	*0.2	200	644	303	4049	19.8	144	1	2023	17.7	39	4203	1167	2619	2110	45	1659	118	97	48	26	64	935	69	6802	135	316	34	208	49	24750	165
494	49462	0	5	10	1	1	0	1	2	2015-04-22	2	Mali 49462	478	0.02	287	3	31046	OOR >	340	468	316	21286	64	23386	55	126	2.1	783	1613	1788	1315	1280	220	1338	352	327	173	255	1078	402	468	386	592	322	134	121	1650	24230	2396
494	49463	1	2		1	1	0	1	2	2015-04-22	2	Mali 49463	30270	>2.39	137	1.6	29619	OOR >	712	1634	1772	2401	13.7	27423	OOR >	1868	16.7	186	8637	6703	7864	3989	69	834	310	171	128	62	274	150	94	214	2743	526	54	163	31655	29595	2477
494	49464	0	2		1	1	0	1	2	2015-04-22	2	Mali 49464	817	0.03	247	2.7	296	*0.1	533	390	563	2165	12.8	29316	OOR >	714	8.1	68	1167	686	12071	8203	75	341	149	48	72	53	215	579	208	329	402	70	157	76	32316	28900	3947
494	49465	1	3		1	1	0	1	2	2015-04-22	2	Mali 49465	5412	0.15	94	1.1	28124	42.5	307	371	517	32193	OOR >	32153	OOR >	32068	*138.6	269	204	369	11824	2253	98	412	298	156	114	98	395	133	102	500	180	258	64	62	28878	2289	6619
494	49466	1	2	7	1	1	0	1	2	2015-04-22	2	Mali 49466	31969	>2.39	144	1.7	30899	OOR >	15248	5954	6453	28430	OOR >	14030	36.2	27844	*124.8	308	233	5390	14269	4743	153	629	461	253	116	120	440	320	140	680	214	425	87	81	30131	28250	690
494	49467	1	5	12	1	1	0	1	2	2015-04-22	2	Mali 49467	629	0.03	129	1.5	29281	OOR >	62	572	560	8349	32.9	9895	27.7	3230	25.2	340	486	29248	23541	3864	146	1179	295	131	152	99	438	176	203	2074	206	212	70	92	31596	13475	1599
494	49468	1	5		1	1	0	1	2	2015-04-22	2	Mali 49468	815	0.03	137	1.6	28273	47.9	362	152	146	31766	OOR >	3066	11.3	31747	*137.6	71	462	14250	2845	1112	96	625	225	165	130	31	122	390	106	6674	1404	180	68	72	29922	26232	3132
494	49469	0	6	12	1	1	0	1	2	2015-04-22	2	Mali 49469	25709	0.59	196	2.2	30152	OOR >	11332	687	350	7376	30.2	32241	OOR >	14068	75.2	98	2950	1590	1490	3163	95	613	239	94	85	40	244	419	389	1603	754	180	78	224	32203	28921	2764
496	49650	0	5		1	1	0	1	2	2015-04-22	2	Mali 49650	29044	1.27	123	1.4	30547	OOR >	450	594	334	15221	50	25743	64.5	272	3.9	93	907	429	6688	3622	232	2112	308	232	81	121	203	532	344	650	276	1186	117	49	30533	27290	2048
496	49651	0	5	11	1	1	0	1	2	2015-04-22	2	Mali 49651	607	0.03	97	1.1	30862	OOR >	117	131	504	15138	49.8	23070	54.2	139	2.3	357	8690	1312	3829	1125	157	1179	275	175	204	100	584	229	120	219	275	690	138	76	32092	26497	4423
496	49652	1	4		1	1	0	1	2	2015-04-24	1	Mali 49652	11200	0.22	173	2	25671	25.4	472	404	449	29967	OOR >	30344	OOR >	17063	86.7	127	550	4291	6837	2500	142	188	317	346	256	79	288	465	107	4946	557	252	128	130	31793	20261	22879
496	49653	1	6		1	1	0	1	2	2015-04-24	1	Mali 49653	8846	0.19	241	2.6	23705	21.3	339	196	645	28959	OOR >	31343	OOR >	28388	*126.6	102	508	1340	1414	916	202	424	172	118	67	138	169	451	186	290	1873	133	194	298	31970	3461	3025
496	49654	1	6		1	1	0	1	2	2015-04-24	1	Mali 49654	26200	0.63	477	4.5	26806	29.3	2621	1890	695	31695	OOR >	30657	OOR >	31438	*136.6	362	1647	7185	21883	6338	211	3724	369	241	133	124	392	1473	896	1008	1099	3686	83	84	31292	27541	1927
496	49655	1	4	14	1	1	0	1	2	2015-04-24	1	Mali 49655	1139	0.04	256	2.8	18836	15.3	2441	2330	1231	31815	OOR >	31622	OOR >	29817	*131.3	141	1268	28532	8972	7737	81	737	289	195	154	78	334	948	535	650	1510	318	50	56	31351	5387	1006
496	49656	0	5	14	1	1	0	1	2	2015-04-24	1	Mali 49656	3740	0.12	299	3.2	25135	24.1	510	428	901	26329	OOR >	31154	OOR >	1421	13.6	216	6009	1329	6022	5880	209	301	515	334	145	3595	327	965	209	895	963	202	138	102	29287	26221	17058
496	49657	1	5	10	1	1	1	1	3	2015-04-24	1	Mali 49657	4555	0.13	186	2.1	26716	28.9	98	200	249	26703	OOR >	29911	OOR >	6400	41.8	362	1067	449	990	854	146	88	264	185	89	123	473	319	217	434	423	236	202	284	31594	15868	2861
496	49658	1	2		1	1	0	1	2	2015-04-24	1	Mali 49658	23139	0.45	158	1.8	25860	25.9	109	772	887	23920	72.7	31590	OOR >	9311	55.3	95	3877	5473	922	2613	113	182	202	98	137	69	222	748	146	620	275	227	41	113	31666	27291	27684
496	49659	1	6	12	1	1	0	1	2	2015-04-24	1	Mali 49659	362	0.02	193	2.2	1109	0.6	77	169	716	23305	70	187	1.3	156	2.5	72	600	857	865	1299	72	469	93	70	80	24	252	1607	186	813	407	80	193	73	143	5145	126
496	49660	1	5		1	1	1	1	3	2015-04-24	1	Mali 49660	12760	0.23	105	1.2	27357	32.4	413	234	245	20117	61.1	20952	49.6	231	3.5	160	2185	1326	4422	2832	123	799	157	101	275	77	386	718	360	503	357	120	459	847	31045	25917	713
496	49661	1	2	9	1	1	0	1	2	2015-04-24	1	Mali 49661	4929	0.14	479	4.6	27866	37.5	21862	1244	4135	31982	OOR >	30622	OOR >	31723	*137.5	842	4265	7318	5827	5093	415	1640	1064	735	236	352	1160	2587	1158	1047	1200	856	173	150	29483	7715	24961
496	49662	0	2	6	1	1	0	1	2	2015-04-24	1	Mali 49662	23967	0.48	628	5.6	25946	26.1	846	560	893	6690	28.2	29146	OOR >	1895	16.9	114	2907	1129	12919	6367	429	1165	323	166	123	257	276	2741	569	2643	1045	359	119	72	390	197	154
496	49663	0	2	6	1	1	0	1	2	2015-04-24	1	Mali 49663	29303	1.45	245	2.7	25717	25.5	1525	403	631	27678	OOR >	30821	OOR >	1527	14.4	314	665	582	21398	25026	210	583	429	317	153	97	378	511	224	650	438	888	80	79	23690	26919	357
496	49664	0	3	10	1	1	0	1	2	2015-04-24	1	Mali 49664	1935	0.06	98	1.1	-1183	OOR <	12904	167	196	30798	OOR >	31413	OOR >	5643	38.1	72	649	8494	23601	3882	75	719	321	174	92	31	233	312	246	533	274	301	29	64	28387	25878	6866
496	49665	1	3	10	1	1	0	1	2	2015-04-24	1	Mali 49665	10125	0.2	186	2.1	23654	21.2	1193	565	774	29499	OOR >	30186	OOR >	23852	*111.3	149	660	4188	24848	10927	140	718	347	144	105	68	347	1132	172	762	301	230	104	78	30552	18348	5750
496	49666	1	3		1	1	0	1	2	2015-04-24	1	Mali 49666	21256	0.39	383	3.8	25688	25.4	1270	2400	492	28566	OOR >	13231	34.6	1212	12.1	251	503	2055	3332	2839	149	807	211	158	103	368	382	239	251	663	3237	218	178	256	120	19891	330
496	49667	0	3	9	1	1	0	1	2	2015-04-24	1	Mali 49667	199	0.01	171	2	26781	29.2	147	601	452	168	1.8	139	1	118	2	122	210	27069	17693	3220	69	596	4779	3938	66	41	150	439	101	468	270	3092	47	43	29722	20315	910
496	49668	0	4	11	1	1	0	1	2	2015-04-24	1	Mali 49668	25948	0.62	168	1.9	23452	20.9	269	180	291	26300	OOR >	30646	OOR >	353	4.8	251	724	5395	21589	2673	166	341	357	195	105	75	336	361	243	263	507	309	90	1176	28656	23653	1238
496	49669	1	5		1	1	0	1	2	2015-04-24	1	Mali 49669	28028	0.93	4002	21.7	26162	26.8	84	13290	249	27071	OOR >	30122	OOR >	9860	57.7	102	855	7979	1818	1833	64	471	292	191	77	31	143	666	1955	312	8423	143	288	161	30068	25797	3753
502	50250	1	6	13	1	1	1	1	3	2015-04-24	1	Mali 50250	28443	1.05	67	0.7	25530	25	709	66	193	3907	19.3	428	2.5	1944	17.2	91	2878	3255	852	2118	64	-48	178	92	52	47	115	506	75	351	206	141	52	46	31362	14082	426
502	50251	1	6	12	1	1	1	1	3	2015-04-24	1	Mali 50251	24832	0.53	107	1.2	23517	21	318	276	425	30401	OOR >	29067	OOR >	30144	*132.4	244	724	13143	426	814	307	659	440	326	122	57	234	460	109	1515	320	272	60	47	2012	24011	4427
502	50252	0	6	13	1	1	0	1	2	2015-04-24	1	Mali 50252	11130	0.21	155	1.8	26463	27.9	675	264	489	30033	OOR >	7317	22	29629	*130.7	148	885	958	6105	4459	200	252	518	573	83	76	178	230	109	24822	171	419	47	40	27795	15553	916
502	50253	1	6	14	1	1	1	1	3	2015-04-24	1	Mali 50253	30329	>2.39	97	1.1	23723	21.3	247	570	365	31462	OOR >	30109	OOR >	31259	*136.0	78	2523	1831	446	751	116	-75	1907	1455	78	45	136	374	194	1943	109	819	64	38	9428	3157	3199
502	50254	0	6	14	1	1	0	1	2	2015-04-24	1	Mali 50254	30265	>2.39	1063	8.3	20558	17.1	443	1846	1915	27149	OOR >	29717	OOR >	18264	91.2	56	532	2396	22533	8743	117	-26	425	247	70	62	139	284	207	3479	212	263	42	56	27418	24966	11759
502	50255	0	5	11	1	1	0	1	2	2015-04-24	1	Mali 50255	26027	0.62	112	1.3	25009	23.8	449	195	422	4818	22.4	26645	OOR >	306	4.3	76	396	3050	23558	17025	62	346	325	121	72	26	117	190	122	2255	188	386	30	32	27720	10322	182
502	50256	1	4	13	1	1	0	1	2	2015-04-24	1	Mali 50256	29596	1.56	118	1.4	13507	10.4	234	81	151	30133	OOR >	26446	OOR >	29908	*131.6	86	1662	3389	2760	1089	96	331	118	62	57	41	431	293	83	524	134	136	69	50	23240	13104	6248
502	50257	0	5	12	1	1	0	1	2	2015-04-24	1	Mali 50257	284	0.01	457	4.4	24569	22.9	5628	1855	1550	31042	OOR >	30708	OOR >	30536	*133.7	171	409	901	7591	6927	156	340	271	220	130	149	298	294	214	1371	328	284	52	46	30863	26242	11553
502	50258	1	4	12	1	1	0	1	2	2015-04-24	1	Mali 50258	343	0.02	119	1.4	3820	2.6	80	5164	549	24505	76.4	30993	OOR >	6898	44.2	100	438	3920	5950	1245	114	203	184	106	82	27	167	1114	175	263	752	137	132	1219	26763	2040	3931
502	50259	1	4	11	1	1	0	1	2	2015-04-24	1	Mali 50259	584	0.02	301	3.2	25963	26.2	1953	564	882	30636	OOR >	29373	OOR >	30402	*133.2	253	1570	1853	1351	4191	789	1633	234	184	640	138	392	761	271	634	1094	214	83	97	30182	16663	12523
502	50260	0	4	13	1	1	0	1	2	2015-04-24	1	Mali 50260	14193	0.25	84	0.9	21941	18.8	65	67	164	25104	86.2	783	3.9	24646	*114.0	125	2580	1035	495	557	89	223	122	67	58	504	320	1010	231	167	335	134	53	37	29452	9129	5784
502	50261	1	4	11	1	1	0	1	2	2015-04-24	1	Mali 50261	444	0.02	157	1.8	24905	23.5	241	191	767	14285	47.8	20959	49.6	712	8.1	167	368	3081	3300	2465	218	452	342	246	122	246	513	1230	411	402	356	224	164	146	30083	26882	4132
502	50262	0	4	12	1	1	0	1	2	2015-04-24	1	Mali 50262	29053	1.6	203	2.3	25309	24.5	3727	2661	3517	1062	7.7	785	3.9	730	8.3	253	20392	19284	11337	7077	161	611	343	315	101	111	358	372	206	349	280	252	128	65	28633	28029	12866
502	50263	1	5	13	1	1	0	1	2	2015-04-24	1	Mali 50263	2962	0.1	171	2	26905	29.8	389	175	472	2147	12.7	505	2.8	1790	16.2	354	1437	2221	3544	2611	598	513	332	233	96	340	490	1130	602	609	416	337	84	61	27683	2051	4506
502	50264	0	4	12	1	1	0	1	2	2015-04-24	1	Mali 50264	10551	0.2	123	1.4	26672	28.7	29687	695	1136	26403	OOR >	26954	OOR >	25617	*117.3	148	2799	5700	5646	2029	159	805	259	119	78	50	144	1361	312	5525	428	345	56	33	30863	8986	3072
502	50265	0	3	12	1	1	0	1	2	2015-04-24	1	Mali 50265	241	0.01	73	0.8	25730	25.5	217	198	118	2927	15.8	15788	39.7	121	2.1	215	2827	1835	4294	1836	97	73	285	144	68	245	278	151	112	316	181	250	51	40	25165	12051	3188
502	50266	0	5	12	1	1	0	1	2	2015-04-24	1	Mali 50266	23557	0.23	111	1.3	24263	22.3	667	735	1123	430	3.9	342	2.1	312	4.3	146	835	1002	15043	10123	475	1134	304	246	176	247	288	1026	591	586	187	172	53	36	24602	2468	4943
502	50267	0	4	10	1	1	0	1	2	2015-04-24	1	Mali 50267	25068	0.54	114	1.3	23553	21.1	4360	150	275	14284	47.8	223	1.5	1197	12	65	486	2691	10145	9491	55	1326	334	221	72	28	79	377	52	364	105	150	65	78	8357	18299	288
502	50268	0	5	11	1	1	0	1	2	2015-04-24	1	Mali 50268	188	0.006	72	0.8	12319	9.4	565	418	540	5438	24.4	30471	OOR >	183	2.9	44	427	1933	5480	4843	139	162	314	129	121	104	303	270	168	256	338	168	56	44	27459	23762	4842
502	50269	1	3	11	1	1	0	1	2	2015-04-24	1	Mali 50269	312	0.02	159	1.8	25536	25	659	408	936	26588	OOR >	27441	OOR >	24142	*112.3	300	1031	9780	17605	5726	684	572	343	195	168	152	467	1991	440	1132	829	250	113	2301	24064	5216	2665
503	50350	1	6	14	1	1	0	1	2	2015-04-24	1	Mali 50350	981	0.03	444	4.3	20967	17.6	151	1729	237	29556	OOR >	23860	56.3	2158	18.6	241	230	938	1183	1391	166	120	236	174	171	62	1059	424	356	871	848	192	86	199	29119	7148	1090
503	50351	0	5	14	1	1	0	1	2	2015-04-24	1	Mali 50351	4149	0.13	390	3.9	25614	25.2	359	435	678	26491	OOR >	30267	OOR >	24937	*115.0	613	519	1865	2242	2566	298	792	399	230	186	3001	1114	779	342	768	862	316	137	161	28421	8644	3293
503	50352	0	6	15	1	1	0	1	2	2015-04-24	1	Mali 50352	23773	0.49	291	3.1	22088	19	323	439	348	25630	OOR >	30415	OOR >	705	8.1	210	1164	6125	20634	2483	162	534	278	174	117	30	229	514	235	809	812	179	118	58	30741	24290	9359
503	50353	0	6	12	1	1	0	1	2	2015-04-24	1	Mali 50353	6691	0.16	194	2.2	22677	19.8	83	857	294	29456	OOR >	28546	OOR >	5240	36.1	57	887	15455	3047	1900	70	232	141	100	75	23	295	847	127	373	408	156	24	23	19076	716	2782
503	50354	0	5	14	1	1	0	1	2	2015-04-24	1	Mali 50354	7447	0.17	63	0.6	8328	6.1	175	125	84	5157	23.5	28669	OOR >	534	6.5	26	185	6655	898	459	38	-75	131	98	62	14	60	124	38	283	68	94	21	18	457	72	509
503	50355	1	6	12	1	1	0	1	2	2015-04-24	2	Mali 50355	2563	0.09	162	1.9	-35	OOR <	172	92	105	11971	42.3	31717	OOR >	2584	21.3	67	2053	974	2036	800	35	208	113	81	109	38	72	274	367	438	102	118	38	25	32089	15008	371
503	50356	1	6	14	1	1	0	0	2	2015-04-24	2	Mali 50356	13857	0.25	652	5.8	8349	6.1	321	77	201	31109	OOR >	32413	OOR >	31939	*138.2	105	452	1458	23721	9251	184	646	320	167	119	175	265	462	1896	899	641	283	42	43	27706	1271	1314
503	50357	0	6	12	1	1	0	0	2	2015-04-24	2	Mali 50357	22143	0.41	350	3.6	29487	OOR >	488	388	317	31036	OOR >	31176	OOR >	31099	*135.5	466	458	1972	3595	1708	208	514	450	288	219	203	665	587	404	696	682	388	132	155	31761	18720	17070
503	50358	1	6	14	1	1	0	0	2	2015-04-24	2	Mali 50358	1693	0.06	2493	15.4	-52	OOR <	3435	15437	294	29388	OOR >	31976	OOR >	30461	*133.4	64	3459	2316	4051	4093	77	503	337	253	94	65	204	707	122	1198	1811	323	70	49	31895	16795	3732
503	50359	0	6	15	1	1	0	0	2	2015-04-24	2	Mali 50359	2555	0.09	281	3	22644	19.7	227	275	309	18652	57.8	19721	47.2	180	2.8	133	338	9746	2447	900	219	379	799	647	115	33	177	924	103	716	455	511	323	168	12208	20568	2393
503	50360	1	4		1	1	0	1	2	2015-04-24	2	Mali 50360	1036	0.04	389	3.9	30488	OOR >	1792	314	648	27559	OOR >	32320	OOR >	11358	64.1	133	6061	4441	27203	8057	116	653	398	251	203	49	324	441	344	761	2041	367	4650	1037	32005	25485	28345
503	50361	0	1		1	1	0	1	2	2015-04-24	2	Mali 50361	4072	0.13	32	OOR <	13159	10.1	45	67	172	17475	55.1	30643	OOR >	59	1.1	43	86	428	9366	10161	26	123	335	225	70	27	70	363	66	189	400	224	34	1612	229	11643	123
503	50362	1	2		1	1	0	1	2	2015-04-24	2	Mali 50362	26141	0.62	194	2.2	1267	0.7	32341	393	535	16268	52.4	31770	OOR >	6020	40	57	28445	29642	27283	8726	77	469	210	144	117	57	153	440	153	551	265	194	295	39	31962	25442	7429
503	50363	0	2		1	1	0	1	2	2015-04-24	2	Mali 50363	30144	2.28	180	2	-61	OOR <	123	166	512	30221	OOR >	32094	OOR >	214	3.3	80	341	2646	4949	4725	201	331	198	110	105	48	124	209	115	859	520	169	57	145	6046	12660	936
503	50364	0	3	10	1	1	0	1	2	2015-04-24	2	Mali 50364	28873	1.21	146	1.7	13876	10.7	323	520	776	1514	9.9	30602	OOR >	252	3.7	132	4240	3682	7981	2272	72	224	210	157	126	82	232	273	186	698	458	192	59	40	31483	14337	726
503	50365	0	3		1	1	0	1	2	2015-04-24	2	Mali 50365	153	0.005	185	2.1	28374	55.3	61	221	254	18441	57.3	30270	OOR >	21101	101.6	130	318	2446	4079	2887	71	688	847	688	200	48	172	260	259	627	475	597	39	48	47	74	307
503	50366	1	4		1	1	0	0	2	2015-04-24	2	Mali 50366	550	0.02	105	1.2	19594	16	1277	3844	1146	471	4.2	31374	OOR >	757	8.5	43	9678	29450	28649	14061	39	886	286	193	99	35	113	456	113	421	224	152	33	92	31961	26721	919
503	50367	1	5	11	1	1	0	1	2	2015-04-24	2	Mali 50367	681	0.03	212	2.4	21941	18.8	696	560	325	30673	OOR >	28449	OOR >	14832	78.2	53	879	518	5387	2172	62	455	427	286	145	31	107	490	77	414	359	512	30	32	31530	13731	2677
503	50368	1	3		1	1	0	1	2	2015-04-24	2	Mali 50368	369	0.02	194	2.2	29176	OOR >	380	429	543	4561	21.6	32129	OOR >	6695	43.3	294	592	2297	3646	1424	151	400	266	211	173	84	587	774	373	705	553	300	126	98	29210	5714	2814
503	50369	0	3	9	1	1	0	1	2	2015-04-24	2	Mali 50369	9843	0.2	212	2.4	25881	26	502	1515	1897	24934	81.6	30997	OOR >	204	3.1	73	630	7614	5185	2981	147	597	271	190	517	70	141	289	151	16060	274	364	61	52	311	215	186
609	60950	0	3		1	1	1	1	3	2015-04-24	2	Mali 60950	24262	0.49	905	7.4	29495	OOR >	1474	747	804	3373	17.4	4355	14.8	1388	13.4	176	1354	1601	11121	5646	282	1530	488	344	189	171	357	504	430	384	238	481	103	361	31436	27084	13618
609	60951	1	4	10	1	1	1	1	3	2015-04-24	2	Mali 60951	6112	0.15	279	3	15339	12	2576	2931	4038	10080	37.5	32064	OOR >	15891	82.3	72	142	694	28980	1040	57	295	283	107	84	48	139	176	5017	312	156	155	30	32	31757	11544	1227
609	60952	1	4	11	1	1	1	1	3	2015-04-24	2	Mali 60952	12534	0.23	110	1.3	23627	21.2	947	651	839	25636	OOR >	32306	OOR >	644	7.5	90	3437	6365	2803	2195	230	467	230	162	120	169	316	532	362	524	171	165	185	58	31616	14041	853
609	60953	0	1	7	1	1	1	1	3	2015-04-24	2	Mali 60953	5665	0.15	234	2.6	29322	OOR >	1165	408	580	24087	73.6	31957	OOR >	3428	26.3	329	376	490	5639	2875	112	913	225	301	180	102	649	224	407	481	313	315	151	79	2041	13144	644
609	60954	0	1	7	1	1	1	1	3	2015-04-24	2	Mali 60954	31280	>2.39	116	1.4	29477	OOR >	702	297	624	22368	66.9	30409	OOR >	327	4.5	96	4022	969	11706	3233	59	487	800	696	200	55	133	379	156	356	146	496	133	252	24953	123	674
609	60955	0	5	12	1	1	1	1	3	2015-04-24	2	Mali 60955	31713	>2.39	67	0.7	25614	25.2	68	1220	1729	30369	OOR >	30499	OOR >	1162	11.7	103	2838	3034	6482	1454	49	3545	503	442	163	61	173	420	177	373	131	340	32	27	30763	9840	990
609	60956	1	6	13	1	1	1	1	3	2015-04-24	2	Mali 60956	26151	0.63	491	4.6	21434	18.1	2789	311	145	31824	OOR >	31969	OOR >	31495	*136.8	227	21390	31634	12981	3977	114	1219	318	285	188	83	372	839	182	681	1044	365	72	434	31808	13095	7086
609	60957	1	2	8	1	1	1	1	3	2015-04-24	2	Mali 60957	2703	0.1	59	0.5	-287	OOR <	4995	708	805	30	OOR <	31592	OOR >	52	1	59	852	1949	5707	4039	23	73	32	5	59	1120	176	84	104	417	66	81	15	17	4304	315	170
609	60958	1	6	13	1	1	1	1	3	2015-04-24	2	Mali 60958	32310	>2.39	145	1.7	29090	OOR >	2561	102	140	17724	55.7	31114	OOR >	13389	72.4	258	1186	3485	13887	4851	104	418	233	193	114	70	321	287	137	257	345	246	52	444	32500	9557	4352
609	60959	0	4	11	1	1	1	1	3	2015-04-24	2	Mali 60959	14230	0.26	162	1.9	27985	39.4	305	132	250	31403	OOR >	31183	OOR >	31012	*135.2	157	843	679	6812	2224	151	867	339	179	227	110	278	218	297	3647	227	315	53	44	32464	30986	963
609	60960	1	6	12	1	1	1	1	3	2015-04-24	2	Mali 60960	32115	>2.39	228	2.5	29734	OOR >	419	615	378	16603	53.1	30792	OOR >	785	8.7	488	737	5472	5413	3447	233	759	468	492	199	174	675	884	242	515	613	361	108	95	32235	7503	5949
609	60961	0	4	10	1	1	1	1	3	2015-04-24	2	Mali 60961	646	0.03	157	1.8	30110	OOR >	56	206	343	1379	9.3	32097	OOR >	86	1.6	468	233	10825	20964	3970	169	415	578	538	143	139	641	279	215	313	315	368	1094	165	3202	318	640
609	60962	0	6	12	1	1	1	1	3	2015-04-24	2	Mali 60962	130	0.005	83	0.9	28139	42.9	6614	111	251	30246	OOR >	31918	OOR >	428	5.5	89	742	1499	13336	2277	65	687	385	319	305	53	159	188	139	695	1905	393	26	63	30761	5180	3433
609	60963	1	5	12	1	1	1	1	3	2015-04-24	2	Mali 60963	30974	>2.39	102	1.2	24569	22.9	354	58	140	23837	72.3	29971	OOR >	15864	82.2	87	252	27465	2054	1700	84	1338	170	204	136	57	1244	697	133	504	1975	190	38	319	10656	1898	214
609	60964	0	3	9	1	1	1	1	3	2015-04-24	2	Mali 60964	28455	1.1	84	0.9	28311	50.1	371	438	355	30924	OOR >	31379	OOR >	250	3.7	110	558	7638	30319	28126	79	2575	633	326	263	66	149	278	117	364	1329	586	39	16	32181	15538	2711
609	60965	0	5	13	1	1	1	1	3	2015-04-24	2	Mali 60965	29960	2.04	87	1	26767	29.1	807	93	230	29482	OOR >	30020	OOR >	28169	*125.9	81	2202	715	2235	1504	127	462	1311	1043	139	78	178	808	155	11048	166	431	27	31	7238	177	4939
609	60966	0	4	10	1	1	1	1	3	2015-04-24	2	Mali 60966	13522	0.24	241	2.6	28697	OOR >	276	508	1347	1428	9.5	32049	OOR >	2015	17.7	574	928	4151	21176	6433	248	2749	524	406	252	174	912	900	363	857	870	586	303	279	32340	24996	3657
609	60967	0	4	10	1	1	1	1	3	2015-04-24	2	Mali 60967	253	0.01	118	1.4	28811	OOR >	2571	1051	1176	27411	OOR >	31154	OOR >	18975	93.9	153	855	2326	9870	4890	197	922	446	393	235	175	1164	314	309	2431	1669	495	164	100	32325	15321	23534
609	60968	0	4	11	1	1	1	1	3	2015-04-24	2	Mali 60968	28344	1	120	1.4	28091	41.7	1005	201	336	3951	19.5	30984	OOR >	504	6.3	222	209	6019	1871	773	214	498	487	233	170	259	393	778	276	418	366	432	72	156	25037	1664	2170
609	60969	0	4	11	1	1	1	1	3	2015-04-24	2	Mali 60969	29889	2.09	192	2.2	29112	OOR >	1640	2311	2532	29763	OOR >	30321	OOR >	553	6.7	157	1187	5827	29893	28457	126	558	491	262	240	64	656	275	110	602	319	474	66	57	31971	28788	28171
624	62450	0	6	14	1	1	1	1	3	2015-04-24	2	Mali 62450	158	0.006	176	2	26131	26.7	146	4769	438	29982	OOR >	31692	OOR >	28283	*126.3	113	394	3986	5213	1379	89	446	255	240	103	35	2590	332	129	401	2635	186	81	72	31773	3445	1554
624	62451	0	2		1	1	0	1	2	2015-04-24	2	Mali 62451	27448	0.79	91	1	27854	37.3	60	250	397	31440	OOR >	31804	OOR >	31510	*136.8	59	348	2165	15599	5623	42	1100	283	148	171	45	157	381	64	336	348	255	26	35	29747	27554	3641
624	62452	1	5		1	1	1	1	3	2015-04-24	2	Mali 62452	31394	>2.39	160	1.8	28622	OOR >	206	1290	2526	29869	OOR >	32014	OOR >	28492	*127.0	85	791	8164	995	588	183	664	215	235	148	126	266	562	1390	741	468	268	57	36	8447	1824	1708
624	62453	1	6	14	1	1	1	1	3	2015-04-24	2	Mali 62453	31873	>2.39	184	2.1	29252	OOR >	191	1172	1233	31092	OOR >	24958	60	29547	*130.5	398	1155	6223	3649	1241	282	602	273	206	113	136	458	637	419	278	381	317	54	63	13704	3131	697
624	62454	0	2	8	1	1	1	1	3	2015-04-24	2	Mali 62454	1663	0.05	144	1.7	28213	45.3	8643	1001	918	31753	OOR >	31485	OOR >	30981	*135.1	83	349	1640	1226	1190	87	6030	265	183	179	62	246	594	226	421	195	311	26	21	30543	3773	1253
624	62455	1	3	10	1	1	1	1	3	2015-04-24	2	Mali 62455	21922	0.41	157	1.8	28197	44.8	1166	661	970	31798	OOR >	31858	OOR >	27631	*124.1	91	807	3540	23826	12511	94	6660	455	339	234	41	8254	309	211	424	283	386	193	233	32008	26537	7269
624	62456	0	2	8	1	1	1	1	3	2015-04-24	2	Mali 62456	8330	0.18	52	0.4	287	*0.1	361	115	280	144	1.5	23905	56.4	118	2	31	375	849	8331	3728	67	387	162	76	83	95	75	197	131	424	358	134	29	18	30173	10711	538
624	62457	0	3	10	1	1	1	1	3	2015-04-24	2	Mali 62457	29254	1.52	1823	12.3	29245	OOR >	4097	151	281	29303	OOR >	16836	41.7	6214	40.9	309	1108	1763	4091	5742	266	1157	312	244	228	92	292	752	286	677	504	278	122	119	18347	8127	3030
624	62458	1	6	14	1	1	1	1	3	2015-04-29	1	Mali 62458	31631	>2.39	406	4	27303	32.1	101	272	783	29545	OOR >	29489	OOR >	28755	*127.8	161	1250	2245	4781	1929	140	1700	600	451	120	67	279	289	130	502	691	395	56	61	26947	4793	540
624	62459	0	4	11	1	1	1	1	3	2015-04-29	1	Mali 62459	7839	0.18	116	1.3	25816	25.8	448	152	596	29093	OOR >	30538	OOR >	26936	*121.8	105	712	11901	25190	23359	458	1234	2663	2344	108	274	287	549	660	793	699	1141	44	38	9295	177	243
624	62460	1	6	14	1	1	1	1	3	2015-04-29	1	Mali 62460	30637	>2.39	118	1.4	26153	26.8	77	466	237	17659	55.5	25886	65.8	7448	46.8	181	2012	3486	1537	695	89	25843	311	285	705	62	209	1595	656	300	794	274	51	56	29530	6140	228
624	62461	0	4	11	1	1	1	1	3	2015-04-29	1	Mali 62461	30907	>2.39	142	1.7	25243	24.3	115	69	351	25999	OOR >	3324	12	382	5.1	66	476	593	1608	1015	61	749	120	135	65	37	81	203	81	737	131	110	21	27	1060	441	1425
624	62462	1	5	12	1	1	1	1	3	2015-04-29	1	Mali 62462	1775	0.06	60	0.6	27296	32	289	299	534	3337	17.3	7657	22.8	223	3.4	55	382	1743	16436	15994	55	413	186	74	48	30	94	417	135	580	388	79	35	30	439	27341	357
624	62463	1	3	10	1	1	1	1	3	2015-04-29	1	Mali 62463	25031	0.54	42	0.2	26142	26.8	1594	117	432	50	*0.2	93	0.7	75	1.4	37	2019	6587	810	546	278	882	280	256	39	149	170	308	347	397	54	1248	15	19	16258	3412	5686
624	62464	0	5	12	1	1	1	1	3	2015-04-29	1	Mali 62464	5098	0.15	209	2.3	27679	35.2	590	4150	6114	31745	OOR >	31001	OOR >	31391	*136.5	301	3849	5309	3803	1803	170	982	364	423	160	156	478	1106	351	1482	1100	404	93	88	27217	1626	459
624	62465	0	2	9	1	1	1	1	3	2015-04-29	1	Mali 62465	23866	0.49	247	2.7	25943	26.1	154	111	289	27622	OOR >	28501	OOR >	1463	13.9	162	425	395	1575	1874	102	1918	203	163	101	76	396	832	275	581	1957	189	103	89	2889	160	167
624	62466	1	5	12	1	1	1	1	3	2015-04-29	1	Mali 62466	30906	>2.39	126	1.5	26772	29.2	436	855	527	27806	OOR >	28864	OOR >	553	6.7	134	1499	6944	4308	2528	137	1394	414	261	104	97	179	398	167	610	350	315	45	73	23791	2509	1957
624	62467	1	4	11	1	1	1	1	3	2015-04-29	1	Mali 62467	30065	2.06	86	1	27505	33.6	92	141	1500	27457	OOR >	30195	OOR >	397	5.2	78	581	1887	12045	2441	95	1048	321	195	74	51	263	994	98	606	591	138	114	36	24962	21287	1318
624	62468	0	6	14	1	1	1	1	3	2015-04-29	1	Mali 62468	13413	0.24	272	2.9	26494	28	318	1494	224	29298	OOR >	28596	OOR >	119	2.1	208	560	9888	1161	1613	212	2324	266	184	174	95	329	1897	270	1163	760	256	137	103	29022	2808	3206
624	62469	1	4	9	1	1	1	1	3	2015-04-29	1	Mali 62469	29315	1.5	222	2.5	24296	22.3	2742	1197	139	27666	OOR >	24877	59.6	11123	63.1	101	1913	9556	2122	1943	389	840	278	168	81	169	438	782	632	790	550	198	60	116	29734	23089	19775
626	62650	0	3	8	1	1	1	1	3	2015-04-29	1	Mali 62650	24090	0.49	183	2.1	26767	29.1	130	122	265	50	*0.2	3863	13.5	56	1.1	91	349	529	24220	23775	113	455	288	132	122	84	118	565	77	748	127	156	47	47	30614	26897	15732
626	62651	0	4	10	1	1	0	1	2	2015-04-29	1	Mali 62651	935	0.03	141	1.6	23543	21.1	6031	363	543	26830	OOR >	28351	OOR >	27031	*122.1	133	3007	3161	23216	8736	224	1024	353	142	73	44	219	1134	153	679	283	159	45	99	30795	13971	4044
626	62652	0	1	7	1	1	0	1	2	2015-04-29	1	Mali 62652	151	0.006	798	6.7	27353	32.4	6639	4621	1117	27894	OOR >	27009	OOR >	24315	*112.9	245	1031	7849	7242	5797	186	1510	369	217	281	88	352	559	584	885	4591	309	154	179	26730	25550	2174
626	62653	0	6	10	1	1	0	1	2	2015-04-29	1	Mali 62653	392	0.011	181	2.1	28326	51.1	4159	165	195	28450	OOR >	27494	OOR >	2957	23.5	282	1602	18171	5210	2092	214	1759	1036	970	109	105	366	562	160	593	435	446	138	89	102	382	236
626	62654	0	6	12	1	1	0	1	2	2015-04-29	1	Mali 62654	562	0.02	336	3.5	26423	27.7	362	587	426	30934	OOR >	29830	OOR >	28978	*128.6	115	945	1803	492	467	109	1049	259	214	490	44	201	570	162	865	860	220	54	61	25993	5164	560
626	62655	0	3	9	1	1	0	1	2	2015-04-29	1	Mali 62655	23829	0.47	114	1.3	27041	30.5	707	190	509	272	2.7	27544	OOR >	108	1.9	81	190	1237	11421	9940	53	1515	362	147	71	33	110	418	76	536	192	211	67	48	31331	25028	24757
626	62656	1	5	11	1	1	0	1	2	2015-04-29	1	Mali 62656	1183	0.04	1318	9.7	28295	49.1	1014	1203	633	29834	OOR >	28333	OOR >	5449	37.1	322	8370	1173	4653	4226	236	5324	425	314	888	78	476	1590	2752	1087	813	339	212	189	30671	25174	12038
626	62657	1	3	9	1	1	0	1	2	2015-04-29	1	Mali 62657	24832	0.53	62	0.6	26682	28.8	1756	406	767	458	4.1	11553	31.2	1087	11.2	49	191	948	678	730	67	411	91	87	50	50	119	459	110	216	217	86	36	26	24160	5514	436
626	62658	1	2	7	1	1	1	1	3	2015-04-29	1	Mali 62658	26889	0.71	111	1.3	26549	28.2	2080	291	597	620	5.2	91	0.7	624	7.4	40	106	1899	13063	6194	42	485	171	106	68	24	85	200	50	493	68	147	91	95	10286	2666	460
626	62659	1	5	13	1	1	1	1	3	2015-04-29	1	Mali 62659	30675	>2.39	145	1.7	27648	34.9	1586	1656	2615	16300	52.5	30636	OOR >	3826	28.5	63	445	6438	1721	1296	87	1344	286	235	161	40	106	1612	89	1029	652	418	653	1312	27265	7288	7072
626	62660	0	5	17	1	1	0	1	2	2015-04-29	1	Mali 62660	9335	0.19	217	2.4	26932	29.9	280	1240	195	24512	76.4	28332	OOR >	8214	50.4	422	729	1215	648	570	170	1068	340	259	146	188	629	565	266	364	410	249	110	118	1816	998	439
626	62661	1	6	14	1	1	1	1	3	2015-04-29	1	Mali 62661	30092	2.07	1114	8.6	27737	35.9	566	267	194	3705	18.6	30235	OOR >	5323	36.5	324	3053	1951	5436	3746	347	1192	459	264	262	130	491	931	672	658	527	277	422	368	29271	17413	3443
626	62662	0	3	8	1	1	0	1	2	2015-04-29	1	Mali 62662	24353	0.51	898	7.3	24343	22.4	740	945	1192	30097	OOR >	27740	OOR >	29851	*131.5	578	1429	5733	2025	2528	1325	6380	426	237	422	283	497	1605	504	1175	830	310	235	203	24667	3634	2532
626	62663	0	4	9	1	1	1	1	3	2015-04-29	1	Mali 62663	8239	0.18	153	1.8	25416	24.7	668	414	640	1176	8.3	26286	73.5	1227	12.2	60	1183	1000	1754	1297	132	3570	246	346	94	92	176	690	318	501	400	264	60	31	28372	24289	281
626	62664	1	2	8	1	1	0	1	2	2015-04-29	1	Mali 62664	18549	0.33	170	1.9	26347	27.5	61	236	374	189	2	3231	11.8	124	2.1	158	269	1244	1529	1211	113	516	296	222	116	69	230	564	129	310	328	195	35	36	29847	25426	25084
626	62665	0	3	8	1	1	0	1	2	2015-04-29	1	Mali 62665	23946	0.49	186	2.1	25832	25.8	766	1293	466	19273	59.2	26318	75.1	3342	25.8	214	772	2457	6456	4289	219	822	391	347	336	196	516	1220	2422	919	2527	359	92	472	27555	8850	969
626	62666	0	2	8	1	1	0	1	2	2015-04-29	1	Mali 62666	13379	0.24	135	1.6	26344	27.4	172	2523	4386	215	2.2	24709	59	134	2.3	123	958	11548	1143	1638	71	221	434	349	83	52	215	620	133	598	300	263	34	36	875	24946	712
626	62667	1	5	11	1	1	0	1	2	2015-04-29	1	Mali 62667	29267	1.45	189	2.1	26220	27	3042	344	231	24039	73.3	28704	OOR >	8759	52.8	245	4201	6799	5739	3431	144	839	372	231	90	108	348	370	343	541	280	204	75	180	27120	2987	6715
626	62668	1	3	9	1	1	0	1	2	2015-04-29	1	Mali 62668	29869	1.92	294	3.1	26911	29.8	19281	8753	689	29084	OOR >	8876	25.5	1289	12.7	150	1478	5655	15985	15486	90	929	460	274	114	55	293	2210	139	652	679	421	71	117	23610	462	8086
626	62669	1	6	15	1	1	1	1	3	2015-04-29	1	Mali 62669	13010	0.23	302	3.2	24472	22.7	4047	873	1529	27288	OOR >	28537	OOR >	26210	*119.3	127	889	1745	9876	4004	210	2079	391	178	115	83	158	737	827	1119	623	206	65	63	3327	11968	514
724	72450	0	1		1	1	0	1	2	2015-04-29	1	Mali 72450	23713	0.48	44	0.3	34	OOR <	270	1197	583	422	3.9	818	4.1	226	3.4	44	18821	25672	16544	9440	51	561	822	509	47	34	62	84	75	4117	59	1847	20	16	26071	26141	5493
724	72451	1	2		1	1	0	0	2	2015-04-29	1	Mali 72451	1961	0.07	190	2.1	-372	OOR <	2223	1951	2537	24451	76	1444	6.3	511	6.3	44	336	455	14582	9635	37	414	234	108	61	28	62	166	79	225	98	124	70	139	2807	532	116
724	72452	0	2		1	1	0	0	2	2015-04-29	1	Mali 72452	4781	0.14	100	1.1	25629	25.3	169	281	386	1318	9	30174	OOR >	94	1.7	87	2356	518	3181	1204	91	1102	249	153	73	60	163	513	106	7677	429	137	39	36	30147	23910	4248
724	72453	0	4		1	1	0	1	2	2015-04-29	1	Mali 72453	25143	0.54	57	0.5	24177	22.1	312	299	334	2660	14.8	28720	OOR >	496	6.2	61	985	633	25163	23909	215	234	1319	930	59	2098	354	189	261	255	120	509	115	775	28255	26247	1602
724	72454	0	5		1	1	0	1	2	2015-04-29	1	Mali 72454	141	0.005	108	1.2	22883	20.1	6459	374	211	23472	70.7	28681	OOR >	11558	64.9	251	551	757	2261	1022	115	832	2578	2187	76	24356	1605	282	345	241	240	1162	52	55	27868	1853	471
724	72455	0	5		1	1	0	0	2	2015-04-29	1	Mali 72455	336	0.02	75	0.8	25059	23.9	3108	124	101	28662	OOR >	30605	OOR >	26965	*121.9	162	6965	19802	6690	2892	80	1054	404	325	275	4615	408	332	121	183	247	336	38	64	29390	2608	3718
724	72456	1	6		1	1	0	1	2	2015-04-29	1	Mali 72456	164	0.006	111	1.3	23816	21.5	6230	118	365	19757	60.3	24742	59.1	5829	39	80	672	1560	1064	542	216	675	233	171	61	42	163	1524	1646	17597	10027	136	34	38	30315	24240	1008
724	72457	0	1		1	1	1	1	3	2015-04-29	1	Mali 72457	2564	0.09	196	2.2	87	OOR <	98	157	134	24181	74.1	29772	OOR >	1686	15.5	48	3707	2599	14115	5658	46	503	223	138	83	13156	8879	159	307	792	414	220	30	23	7184	21261	1226
724	72458	0	6		1	1	0	1	2	2015-04-29	1	Mali 72458	76	0.006	124	1.4	19643	16.1	445	343	690	29182	OOR >	30297	OOR >	4350	31.4	53	362	2917	686	927	47	1081	148	48	124	32	82	411	414	4577	579	81	41	58	11568	24226	572
724	72459	1	6		1	1	0	1	2	2015-04-29	1	Mali 72459	345	0.02	89	1	26368	27.5	216	525	887	26513	OOR >	1241	5.6	25954	*118.5	194	519	1551	573	728	87	905	311	237	105	66	255	367	101	202	179	461	33	38	20351	3304	726
724	72460	0	5		1	1	0	0	2	2015-04-29	1	Mali 72460	30043	2.17	198	2.2	22827	20	311	73	111	26532	OOR >	27783	OOR >	5052	35.1	117	352	323	315	344	136	1133	468	462	87	36	163	244	231	635	221	261	124	187	27796	9432	4318
724	72461	1	2		1	1	0	0	2	2015-04-29	2	Mali 72461	18656	0.33	167	1.9	75	OOR <	3857	178	282	1782	11.1	27507	OOR >	215	3.3	29	1029	153	6757	6029	38	1591	82	67	33	38	74	204	66	171	129	103	22	31	19162	1458	16121
724	72462	1	1		1	1	0	0	2	2015-04-29	2	Mali 72462	12355	0.22	63	0.6	149	OOR <	7638	2060	1599	1623	10.4	16072	40.2	146	2.4	25	207	1165	25838	15526	29	118	174	68	47	33	53	96	53	399	109	95	18	22	24903	24120	5676
724	72463	0	1		1	1	0	1	2	2015-04-29	2	Mali 72463	509	0.02	162	1.9	27160	31.2	616	972	1036	29193	OOR >	30338	OOR >	28159	*125.9	127	1104	20193	10998	4252	274	996	561	476	290	179	457	620	1318	23220	554	474	72	81	26577	26639	2596
724	72464	0	3		1	1	0	1	2	2015-04-29	2	Mali 72464	700	0.03	60	0.6	14060	10.8	1901	1404	1138	25013	83.3	27657	OOR >	1343	13.1	55	419	5172	4147	1263	37	237	86	36	77	3270	3866	218	38	123	117	153	107	259	24609	837	1290
724	72465	0	4		1	1	0	1	2	2015-04-29	2	Mali 72465	270	0.01	132	1.5	25693	25.4	379	136	220	30266	OOR >	29801	OOR >	28168	*125.9	137	1202	1301	861	970	76	1021	277	151	172	60	372	388	128	1503	383	230	659	49	28317	16218	1570
724	72466	1	1		1	1	1	1	3	2015-04-29	2	Mali 72466	1960	0.07	41	0.2	412	*0.1	151	520	220	17048	54.1	29539	OOR >	571	6.9	25	2084	569	9782	3732	33	451	133	51	35	2380	468	103	58	2850	63	2794	34	18	496	217	700
745	74550	0	3		1	1	0	0	2	2015-04-29	2	Mali 74550	28291	0.94	143	1.7	29756	OOR >	663	455	422	919	6.9	28169	OOR >	218	3.3	360	482	2084	10453	3435	138	515	481	325	192	132	487	204	159	598	272	615	72	71	1768	462	21188
745	74551	0	3		1	1	1	1	3	2015-04-29	2	Mali 74551	1698	0.06	75	0.8	27630	34.7	1471	707	1028	107	1.1	14431	37	93	1.7	87	78	931	7496	730	51	296	155	119	61	50	133	105	52	185	78	117	46	23	80	13113	69
745	74552	0	6	12	1	1	1	1	3	2015-04-29	2	Mali 74552	1640	0.06	67	0.7	16999	13.5	177	115	253	25788	OOR >	4999	16.4	1827	16.4	46	726	1057	2536	1660	49	2562	841	654	70	28	74	189	84	201	1481	365	42	45	23917	9390	415
745	74553	0	6		1	1	0	1	2	2015-04-29	2	Mali 74553	29664	1.8	83	0.9	25479	24.9	37	69	89	28517	OOR >	24861	59.6	730	8.3	44	771	2825	4686	2023	50	3569	289	182	153	44	332	143	81	376	693	251	33	33	30312	23858	10228
745	74554	1	1		1	1	0	1	2	2015-04-29	2	Mali 74554	803	0.03	106	1.2	27816	36.8	39	440	302	628	5.2	237	1.5	659	7.7	162	1091	426	24022	9393	76	448	392	368	82	80	186	99	96	297	128	313	43	46	24827	27709	11764
745	74555	1	1		1	1	1	1	3	2015-04-29	2	Mali 74555	28427	1.05	170	2	28909	OOR >	94	185	166	5357	24.1	240	1.5	6885	44.2	493	502	376	3486	8009	223	414	222	182	148	174	3188	173	262	664	328	226	118	334	28602	1417	682
745	74556	0	1		1	1	1	1	3	2015-04-29	2	Mali 74556	1909	0.07	109	1.3	28987	OOR >	73	115	114	7054	29.2	133	1	9284	55.2	383	194	297	16647	10132	148	471	474	462	92	142	514	143	150	294	247	578	78	60	450	509	253
745	74557	0	1		1	1	0	1	2	2015-04-29	2	Mali 74557	4590	0.14	71	0.8	28182	44.2	214	227	368	187	2	26581	OOR >	174	2.8	109	127	597	9120	3098	60	497	273	138	80	46	120	572	177	265	143	280	26	31	28024	15864	1392
745	74558	0	1		1	1	0	1	2	2015-04-29	2	Mali 74558	5376	0.15	123	1.4	29117	OOR >	70	448	547	339	3.3	147	1	71	1.3	422	436	1916	24451	15458	147	739	406	304	133	148	546	142	184	276	316	292	214	430	30500	26517	24209
745	74559	0	1		1	1	1	1	3	2015-04-29	2	Mali 74559	430	0.02	45	0.3	611	*0.3	22	169	203	56	0.4	52	0.4	15	0.2	25	81	2632	19305	12936	32	232	341	149	88	27	26	83	57	200	41	322	13	11	481	24949	360
745	74560	1	3		1	1	1	1	3	2015-04-29	2	Mali 74560	374	0.02	260	2.8	25932	26.1	358	464	494	602	5.1	30510	OOR >	873	9.5	350	12419	23929	5255	1807	195	534	278	208	102	139	463	302	237	549	377	298	93	139	29674	23956	3078
745	74561	0	3		1	1	0	1	2	2015-04-29	2	Mali 74561	2513	0.09	43	0.2	25456	24.8	986	129	123	1183	8.3	29767	OOR >	113	2	58	24176	9188	4119	3090	37	433	160	117	48	29	78	88	31	242	65	365	21	59	1715	752	580
745	74562	1	6		1	1	1	1	3	2015-04-29	2	Mali 74562	97	0.005	73	0.8	26726	28.9	57	303	202	23567	71.1	25003	60.2	25054	*115.4	50	458	1133	2574	932	55	3229	240	119	74	36	80	299	55	178	253	219	63	257	28755	11121	709
745	74563	0	6		1	1	0	1	2	2015-04-29	2	Mali 74563	3281	0.11	76	0.8	23489	21	28	438	134	17692	55.6	28009	OOR >	6645	43	79	109	2812	8435	2029	56	282	150	102	55	29	99	295	66	251	330	231	41	50	28372	23234	1489
745	74564	1	3		1	1	1	1	3	2015-04-29	2	Mali 74564	2442	0.09	99	1.1	14051	10.8	360	86	378	683	5.6	30608	OOR >	956	10.1	49	395	3347	9585	2451	57	227	96	54	35	28	62	634	242	338	162	137	219	164	30410	17495	18731
745	74565	1	3		1	1	0	1	2	2015-04-29	2	Mali 74565	15980	0.28	98	1.1	26717	28.9	420	113	201	28000	OOR >	30301	OOR >	14791	78	136	11281	18312	23783	20483	234	755	350	150	102	154	247	274	301	179	467	394	40	22	6110	759	617
745	74566	0	3		1	1	0	1	2	2015-04-29	2	Mali 74566	28504	1.11	77	0.8	26967	30.1	216	50	112	62	0.5	77	0.6	47	0.9	183	268	596	3566	1657	70	432	206	136	107	67	249	118	83	289	144	180	63	41	30883	20027	3324
774	77456	1	4	9	1	1	0	1	2	2015-04-29	2	Mali 77456	29093	1.4	126	1.5	750	0.4	171	345	808	9479	35.9	17950	43.8	453	5.8	55	451	762	1389	608	50	586	550	530	165	71	80	777	151	24226	23618	453	40	29	744	192	1407
774	77457	0	5	13	1	1	1	1	3	2015-04-29	2	Mali 77457	304	0.01	177	2	1158	0.6	818	530	563	335	3.2	42	0.3	495	6.2	46	707	24077	7250	3385	51	475	289	175	64	30	51	199	125	15270	24072	164	125	329	28817	977	24689
774	77458	0	3		1	1	1	1	3	2015-04-29	2	Mali 77458	25779	0.57	184	2.1	28307	49.8	706	131	1651	29689	OOR >	25453	62.5	29491	*130.3	409	1578	1107	1287	802	382	1338	313	271	228	307	669	720	571	23506	27317	309	81	80	31034	17562	7473
774	77459	0	5	11	1	1	1	1	3	2015-04-29	2	Mali 77459	946	0.04	186	2.1	26210	27	68	730	1382	12893	44.5	2603	10	2631	21.6	124	1734	6202	4769	3161	145	923	297	182	116	95	186	543	192	18695	663	191	72	50	26033	10011	7549
774	77460	0	5	11	1	1	0	1	2	2015-04-29	2	Mali 77460	17813	0.31	192	2.2	24476	22.7	237	225	459	512	4.5	29759	OOR >	313	4.4	131	3006	3779	2090	4100	92	4359	210	162	106	128	361	1305	288	23439	13635	294	33	36	29989	24220	4526
774	77461	0	4		1	1	0	1	2	2015-04-29	2	Mali 77461	27252	0.74	779	6.6	24119	22	673	1006	274	29055	OOR >	30174	OOR >	28030	*125.4	251	5404	24257	6887	2548	176	2497	306	186	155	109	433	507	420	19840	16988	204	192	191	3661	5575	460
774	77462	1	3		1	1	1	1	3	2015-04-29	2	Mali 77462	27881	0.85	103	1.2	26118	26.7	50	306	564	85	0.8	105	0.8	56	1.1	213	484	467	27299	24057	99	1311	328	186	89	85	277	222	107	278	173	320	54	46	27113	22431	2049
774	77463	0	3		1	1	0	0	2	2015-04-29	2	Mali 77463	137	0.006	28	OOR <	2083	1.3	143	237	299	455	4.1	23795	56.1	80	1.5	24	210	712	4314	2947	261	554	71	38	20	177	183	402	476	2510	180	42	78	9	16240	2127	5537
774	77464	0	3		1	1	1	1	3	2015-04-29	2	Mali 77464	7111	0.17	198	2.2	28357	53.6	80	329	554	242	2.5	2964	11	133	2.2	791	6225	3019	2779	4353	361	801	392	284	199	251	1031	314	326	3125	1528	373	176	199	29839	24657	2402
774	77465	1	3	6	1	1	1	1	3	2015-04-29	2	Mali 77465	15216	0.26	28	OOR <	514	*0.2	18	7752	9054	65	0.5	34	0.3	29	0.6	48	1251	4518	3172	3139	77	469	61	42	33	33	40	99	28	325	47	83	19	21	133	21862	167
774	77466	0	5	11	1	1	1	1	3	2015-04-29	2	Mali 77466	3886	0.12	360	3.7	28555	OOR >	383	739	721	25542	OOR >	27537	OOR >	25822	*118.0	687	2032	22299	20703	20898	591	955	811	525	270	372	1132	1009	760	10373	1163	701	179	167	1338	960	10294
774	77467	0	4		1	1	0	1	2	2015-04-29	2	Mali 77467	9731	0.2	99	1.1	26857	29.5	2555	263	497	2236	13.1	30070	OOR >	875	9.5	166	499	5169	24014	22155	154	707	416	187	153	88	224	414	254	7290	543	244	40	61	23880	25355	15384
774	77468	0	3	6	1	1	1	1	3	2015-04-29	2	Mali 77468	27447	0.78	25	OOR <	362	*0.1	44	5330	8828	633	5.3	579	3.1	1038	10.8	29	1099	5371	8380	4200	50	350	134	78	159	20	46	52	26	20463	1725	136	16	15	30315	24207	10502
774	77469	0	3	10	1	1	1	1	3	2015-04-29	2	Mali 77469	3100	0.11	109	1.3	24498	22.7	238	259	252	30458	OOR >	28036	OOR >	30035	*132.1	109	2574	27778	2068	1811	260	1108	286	204	164	175	187	655	459	24968	591	221	708	61	29767	23701	1014
775	77550	1	5	14	1	1	1	1	3	2015-04-30	1	Mali 77550	3140	0.11	166	1.9	27867	37.5	144	451	577	20544	62.1	31217	OOR >	11883	66.3	207	653	3617	953	1033	179	281	192	158	168	130	690	286	145	1414	275	185	70	66	31523	24489	1824
775	77551	0	1		1	1	0	1	2	2015-04-30	1	Mali 77551	6196	0.15	163	1.9	27505	33.6	871	528	816	27728	OOR >	31716	OOR >	21168	101.8	87	1826	1966	3186	2834	88	-12	152	124	167	73	164	833	135	409	310	168	63	69	31275	11860	5224
775	77552	0	5	13	1	1	0	1	2	2015-04-30	1	Mali 77552	237	0.01	161	1.9	19678	16.1	118	484	320	2013	12.1	430	2.5	157	2.6	69	279	333	2070	1757	59	27	183	92	59	43	152	215	80	280	97	164	44	90	27994	8590	1411
775	77553	1	3	9	1	1	0	1	2	2015-04-30	1	Mali 77553	304	0.01	111	1.3	28490	OOR >	1115	533	756	26675	OOR >	24584	58.5	245	3.6	173	916	504	1167	1137	108	1258	301	223	90	105	430	246	187	3117	288	326	48	49	31404	24597	14231
775	77554	1	5	13	1	1	0	1	2	2015-04-30	1	Mali 77554	996	0.037	82	0.9	23567	21.1	242	817	681	8370	32.9	29645	OOR >	4304	31.1	42	1034	1685	9346	3824	30	1390	187	112	51	26	776	425	107	1058	285	187	35	19	28704	12290	616
775	77555	1	5	13	1	1	1	1	3	2015-04-30	1	Mali 77555	12058	0.22	160	1.8	23619	21.2	56	1227	178	29087	OOR >	4174	14.3	29699	*131.0	71	1136	3223	405	325	113	1209	97	102	48	33	161	516	133	359	316	112	34	31	25579	11356	4396
775	77556	1	1		1	1	0	1	2	2015-04-30	1	Mali 77556	24093	0.49	256	2.8	27068	30.6	1778	3167	2219	30240	OOR >	28814	OOR >	28014	*125.4	170	1922	27532	4095	8265	138	755	367	276	123	167	327	764	925	688	726	628	66	82	30203	13676	24440
775	77557	1	5	14	1	1	1	1	3	2015-04-30	1	Mali 77557	522	0.02	63	0.6	18974	15.4	233	157	201	24779	79.2	31221	OOR >	1465	13.9	50	1399	27060	4874	2651	64	633	160	140	50	47	191	280	67	867	124	292	48	37	30234	24142	1301
775	77559	0	3		1	1	0	1	2	2015-04-30	1	Mali 77559	3236	0.11	92	1	4876	3.4	111	462	455	28970	OOR >	31380	OOR >	29075	*128.9	48	1517	2252	1525	1124	45	293	814	706	69	43	154	958	290	689	517	444	28	27	26830	19974	401
775	77560	0	2		1	1	0	1	2	2015-04-30	1	Mali 77560	115	0.006	156	1.8	27980	39.3	1049	368	270	27711	OOR >	28396	OOR >	1285	12.6	68	780	1209	1215	757	65	1019	210	141	850	44	154	222	129	524	342	211	33	28	24039	14537	838
775	77563	1	2		1	1	1	1	3	2015-04-30	1	Mali 77563	142	0.005	119	1.4	27607	34.5	1685	581	992	160	1.7	2693	10.2	393	5.2	128	286	671	1240	989	143	383	243	147	68	111	269	1751	267	400	631	225	34	42	2267	188	117
775	77564	0	6	13	1	1	0	1	2	2015-04-30	1	Mali 77564	8990	0.19	116	1.4	23164	20.5	476	142	323	28626	OOR >	25521	62.9	489	6.1	85	267	659	1894	1449	73	821	150	116	54	42	186	183	272	1350	1577	117	32	41	22504	19167	275
775	77565	1	5		1	1	0	1	2	2015-04-30	1	Mali 77565	23690	0.48	108	1.3	23278	20.6	866	697	743	8503	33.3	29548	OOR >	4411	31.7	72	316	6519	1430	1393	104	1103	207	143	110	26427	18819	498	362	540	264	129	36	50	30749	9044	11245
775	77566	0	5		1	1	0	1	2	2015-04-30	1	Mali 77566	5489	0.15	43	0.2	23159	20.5	368	154	231	4289	20.7	27323	OOR >	4411	31.7	58	2296	1190	940	494	37	1273	76	93	36	34	106	92	71	243	91	132	40	25	30179	12888	415
775	77567	0	4		1	1	0	0	2	2015-04-30	1	Mali 77567	331	0.02	72	0.8	23927	21.7	473	162	202	22174	66.4	26212	71.1	890	9.6	92	1039	6127	1266	1812	51	530	229	140	52	50	183	172	90	412	250	608	28	40	26323	8297	4051
775	77568	1	4		1	1	1	1	3	2015-04-30	1	Mali 77568	652	0.03	106	1.2	26505	28	335	162	612	15145	49.8	24317	57.6	235	3.5	73	202	713	15031	13727	79	568	200	147	52	49	227	245	103	401	97	196	30	34	29916	20555	2601
775	77569	0	4	10	1	1	1	1	3	2015-04-30	1	Mali 77569	25288	0.55	465	4.5	22825	20	1287	219	553	5883	25.8	28207	OOR >	396	5.2	95	3432	9010	24500	18239	107	389	633	465	131	41	1022	479	94	678	2138	592	65	57	30709	19814	11672
821	92050	1	3	10	1	1	1	1	3	2015-04-30	1	Mali 82150	192	0.01	164	1.9	27421	32.9	527	358	1191	4749	22.2	27253	OOR >	2979	23.7	209	748	7430	27223	4804	111	460	745	604	102	108	619	242	493	867	246	1006	147	63	29799	24824	10233
821	92051	1	2		1	1	1	1	3	2015-04-30	1	Mali 82151	4468	0.13	116	1.4	26471	27.9	5281	2635	4513	23342	70.2	26943	OOR >	4439	31.9	109	2746	15176	10851	4274	326	284	580	203	78	119	174	587	578	421	387	321	53	37	30453	24540	1923
821	92052	1	6	12	1	1	1	1	3	2015-04-30	1	Mali 82152	163	0.006	91	1	-417	OOR <	426	442	696	26599	OOR >	23113	54.3	3481	26.6	57	123	1255	3047	2588	55	176	154	122	40	39	102	264	107	311	225	240	38	35	27920	24564	24241
821	92053	0	4	12	1	1	1	1	3	2015-04-30	1	Mali 82153	17086	0.3	154	1.8	27374	32.6	560	289	298	28097	OOR >	29157	OOR >	21163	101.8	320	17228	23772	8504	5059	176	1400	1057	737	137	15153	1789	320	348	670	594	515	101	227	28320	25267	24223
821	92054	1	4	11	1	1	1	1	3	2015-04-30	1	Mali 82154	24741	0.53	173	2	25734	25.5	61	300	480	5830	25.6	2795	10.5	131	2.2	110	1545	1404	6016	1553	94	3167	233	189	130	63	147	706	248	2142	151	296	51	88	22739	3302	2604
821	92055	1	2	6	1	1	1	1	3	2015-04-30	1	Mali 82155	2201	0.08	89	1	27025	30.4	2429	566	542	1915	11.7	169	1.2	1814	16.4	164	209	396	25300	23823	560	3376	411	209	79	384	506	638	691	3374	153	264	51	37	26006	24267	7326
821	92056	0	4		1	1	1	1	3	2015-04-30	1	Mali 82156	4029	0.12	488	4.6	25599	25.2	706	113	232	18344	57.1	4570	15.3	4968	34.7	222	1885	23875	11322	2685	146	776	389	241	145	118	454	930	161	339	392	343	130	101	22514	16247	11483
821	92057	0	4	13	1	1	1	1	3	2015-04-30	1	Mali 82157	22215	0.41	104	1.2	26048	26.5	473	279	397	29963	OOR >	27519	OOR >	29862	*131.5	62	1419	1612	6708	1910	64	574	1457	1178	63	45	137	221	96	324	546	922	26	28	30463	9822	18298
821	92058	1	3	10	1	1	1	1	3	2015-04-30	1	Mali 82158	12618	0.23	660	5.8	-675	OOR <	24283	2202	2205	26178	OOR >	11468	31	25786	*117.9	72	9560	24468	24519	15663	108	1376	200	88	56	40	91	705	92	354	748	162	29	26	30420	9278	2559
821	92059	0	3	10	1	1	0	1	2	2015-04-30	1	Mali 82159	28204	0.94	99	1.1	25919	26.1	499	1335	1756	1395	9.3	128	0.9	1037	10.8	203	403	10561	8025	1591	249	509	412	244	107	207	481	318	289	334	129	473	50	48	24427	24573	23840
821	92060	0	4	11	1	1	0	1	2	2015-04-30	1	Mali 82160	1282	0.04	107	1.2	26538	28.2	102	227	786	591	5	29153	OOR >	494	6.2	51	1448	987	3241	2276	62	1235	253	162	45	43	505	181	106	396	154	281	47	34	30371	27066	11219
821	92061	0	5	13	1	1	1	1	3	2015-04-30	1	Mali 82161	627	0.03	274	2.9	26257	27.1	2116	351	484	25371	OOR >	30282	OOR >	3881	28.8	82	1684	10892	18199	5175	76	670	3287	3382	77	72	318	452	101	593	395	920	285	819	156	23871	196
821	92062	1	4	12	1	1	1	1	3	2015-04-30	1	Mali 82162	13749	0.24	373	3.8	23523	21	872	378	702	28559	OOR >	30367	OOR >	411	5.4	123	14061	13654	11697	3782	374	1027	297	166	217	220	419	808	460	3602	312	287	630	64	18338	26943	3137
821	92063	0	6	14	1	1	1	1	3	2015-04-30	1	Mali 82163	24785	0.53	207	2.3	22822	20	228	407	411	29553	OOR >	28641	OOR >	29396	*130.0	60	358	1761	1716	619	145	10157	414	288	115	80	249	499	154	405	590	590	49	39	913	26526	2334
821	92064	1	2	8	1	1	0	1	2	2015-04-30	1	Mali 82164	591	0.02	167	1.9	27468	33.3	530	24725	605	13590	46.2	29317	OOR >	1387	13.4	158	2001	3576	6719	5058	101	809	458	294	148	84	332	179	148	364	259	280	45	126	30372	24347	24593
821	92065	0	3	8	1	1	1	1	3	2015-04-30	1	Mali 82165	209	0.01	191	2.2	25907	26	9169	274	480	23841	72.3	27684	OOR >	24294	*112.8	80	1147	3442	5430	1229	72	1488	200	196	81	56	185	211	105	289	149	581	113	33	29901	24160	24500
821	92066	1	3		1	1	0	1	2	2015-04-30	1	Mali 82166	26677	0.67	140	1.6	-514	OOR <	1679	414	302	26217	OOR >	30074	OOR >	17265	87.5	110	1066	16370	18495	6854	341	687	305	445	119	57	335	2283	99	9988	813	331	67	76	30561	24815	11283
821	92067	0	2		1	1	1	1	3	2015-04-30	1	Mali 82167	232	0.01	1153	8.8	27342	32.3	889	204	194	30241	OOR >	24560	58.5	29826	*131.4	116	2431	11421	2474	3376	154	711	3362	3581	121	90	515	1427	219	369	372	2303	50	44	30114	23834	2703
821	92068	0	2		1	1	1	1	3	2015-04-30	1	Mali 82168	10526	0.2	100	1.2	23843	21.5	678	433	254	22177	66.4	876	4.3	101	1.8	51	718	1745	21349	4629	40	331	363	220	167	36	298	505	223	243	412	327	25	19	28325	2319	1290
821	92069	0	6	14	1	1	1	1	3	2015-04-30	1	Mali 82169	23394	0.46	444	4.3	25208	24.2	515	342	306	18876	58.3	3085	11.3	494	6.2	71	9195	17042	2029	1233	577	660	900	748	151	45	141	162	115	330	163	295	199	76	29728	23761	14447
836	83650	1	3	8	1	1	1	1	3	2015-04-30	1	Mali 83650	7227	0.17	64	0.6	60	OOR <	45	891	1434	38	OOR <	33	0.2	27	0.5	18	5884	25083	20851	12934	65	804	147	47	33	57	52	240	107	220	77	59	43	69	5886	400	431
836	83651	0	5	13	1	1	1	1	3	2015-04-30	1	Mali 83651	801	0.03	64	0.6	26003	26.3	735	246	430	120	1.3	79	0.6	65	1.2	92	732	554	2624	2079	140	1147	213	118	65	106	371	162	59	112	63	360	51	38	26007	1792	6972
836	83652	1	6	12	1	1	1	1	3	2015-04-30	1	Mali 83652	11328	0.21	202	2.3	27009	30.3	813	135	234	1554	10.1	24446	58.1	559	6.8	499	328	21820	8034	3422	275	4099	450	447	209	220	1005	237	172	626	273	851	3535	191	29260	21746	18750
836	83653	0	3		1	1	1	1	3	2015-04-30	1	Mali 83653	21606	0.4	104	1.2	27120	30.9	69	442	517	24429	75.8	626	3.3	24742	*114.3	216	269	2662	8142	7787	121	334	410	312	131	145	486	171	175	292	143	303	55	52	3786	25001	1341
836	83654	0	3	7	1	1	1	1	3	2015-04-30	1	Mali 83654	1822	0.07	109	1.3	25944	26.1	866	1155	1219	90	0.9	57	0.4	38	0.8	119	1769	7400	26439	24724	82	423	365	184	95	78	272	139	78	134	99	215	54	57	23615	23686	708
836	83655	0	3		1	1	1	1	3	2015-04-30	2	Mali 83655	27028	0.73	134	OOR >	29027	OOR >	30512	549	733	219	2.3	165	1.1	90	1.6	227	1335	16276	25511	16058	154	938	752	427	158	186	525	373	186	327	262	1027	101	94	29950	25911	1658
836	83656	1	3		1	1	0	1	2	2015-04-30	2	Mali 83656	5728	0.15	61	*0.2	514	*0.2	27103	425	594	349	3.3	37	0.3	32	0.6	35	537	1811	24440	18116	55	702	884	429	121	35	54	152	62	199	68	911	22	36	29205	28984	24942
836	83657	0	3		1	1	1	1	3	2015-04-30	2	Mali 83657	156	0.006	141	34.5	27607	34.5	197	447	552	3912	19.4	212	1.4	5951	39.6	372	1095	718	6914	6034	190	531	378	353	162	205	635	139	169	423	249	309	101	94	28795	25610	7162
836	83658	0	4	9	1	1	0	1	2	2015-04-30	2	Mali 83658	29022	1.33	100	59.7	28407	59.7	684	440	799	436	4	98	0.7	53	1	148	8090	3857	17382	3501	111	1086	507	271	127	106	348	1361	116	231	161	363	67	76	24736	5952	2338
836	83659	1	6	15	1	1	1	1	3	2015-04-30	2	Mali 83659	12755	0.23	85	36.2	27768	36.2	161	122	185	105	1.1	70	0.5	49	1	86	519	4237	1889	946	82	404	303	224	80	48	165	129	71	1200	143	740	526	316	30106	18325	4873
836	83660	1	6		1	1	1	1	3	2015-04-30	2	Mali 83660	29075	1.33	170	25.4	25696	25.4	1258	202	286	227	2.3	202	1.3	81	1.5	202	9105	1673	14537	2152	137	626	468	307	112	132	402	384	132	3456	256	530	82	67	30481	25147	12119
836	83661	1	6	14	1	1	1	1	3	2015-04-30	2	Mali 83661	19461	0.34	7975	29.3	26805	29.3	313	551	696	224	2.3	128	0.9	340	4.6	112	1539	6001	6824	3425	65	407	3261	2226	128	61	208	87	76	276	105	1669	192	43	21683	21980	9513
836	83662	0	6	11	1	1	1	1	3	2015-04-30	2	Mali 83662	9477	0.19	74	OOR <	88	OOR <	367	78	302	13743	46.5	3737	13.1	15199	79.6	241	380	1354	6062	3901	619	515	279	232	45	137	147	396	336	244	121	247	56	179	26936	2730	1474
836	83663	1	3	7	1	1	1	1	3	2015-04-30	2	Mali 83663	28811	1.16	71	5.4	7500	5.4	2939	197	535	699	5.7	199	1.3	81	1.5	38	215	347	4716	1643	82	882	382	253	75	101	220	153	105	400	87	644	30	38	12846	583	11305
836	83664	1	5		1	1	1	1	3	2015-04-30	2	Mali 83664	28450	1.1	125	27	26205	27	2921	592	702	150	1.6	124	0.9	82	1.5	179	21813	9173	13692	8869	132	549	286	262	177	143	404	807	177	917	303	226	173	404	130	12524	194
836	83665	1	3		1	1	1	1	3	2015-04-30	2	Mali 83665	2430	0.08	118	36.4	27785	36.4	80	974	982	248	2.5	98	0.7	46	0.9	145	2414	19969	7297	3293	90	576	409	349	150	94	271	176	114	507	138	301	112	61	24002	25357	25992
836	83666	0	4	13	1	1	1	1	3	2015-04-30	2	Mali 83666	23606	0.46	111	39.4	27981	39.4	201	452	664	1083	7.8	368	2.2	1327	12.9	394	581	484	7253	1978	199	739	493	386	309	164	581	686	472	182	228	526	78	78	29969	24530	24804
836	83667	1	4		1	1	1	1	3	2015-04-30	2	Mali 83667	27770	0.8	128	OOR >	28525	OOR >	182	96	120	28065	OOR >	856	4.2	28833	*128.1	258	1335	2949	3987	1241	196	797	556	493	191	188	629	174	188	175	217	551	111	101	132	152	132
871	87150	1	1		0	1	0	0	1	2015-04-30	2	Mali 87150	28822	1.23	75	*0.0	196	*0.0	137	2996	4066	1433	9.5	306	1.9	1271	12.5	47	1626	1368	4636	2262	115	504	256	188	89	76	136	331	152	721	129	393	26	107	91	12809	97
871	87151	1	1		0	1	0	0	1	2015-04-30	2	Mali 87151	28459	1.1	348	*0.1	387	*0.1	10382	282	699	24451	76	30018	OOR >	1476	14	53	351	1309	24747	11590	63	5478	1728	1029	252	1908	125	683	110	498	284	643	59	62	30206	25915	1419
871	87152	0	1		0	1	0	0	1	2015-04-30	2	Mali 87152	30178	2.28	75	*0.0	204	*0.0	2910	109	240	19472	59.6	23122	54.3	578	6.9	45	1074	939	2490	3196	81	535	1203	983	183	52	101	741	111	1361	4595	774	32	40	62	23487	134
871	87153	0	1		0	1	0	0	1	2015-04-30	2	Mali 87153	311	0.01	91	*0.1	294	*0.1	2095	538	642	29110	OOR >	30068	OOR >	525	6.5	43	472	4250	24919	18785	147	584	477	355	133	55	112	249	352	293	22876	186	732	2427	28619	25675	1716
871	87154	1	1		0	1	0	0	1	2015-04-30	2	Mali 87154	3055	0.1	85	21.9	24052	21.9	7781	322	639	773	6.1	28809	OOR >	6889	44.2	62	383	1811	1093	1031	121	942	325	398	159	62	118	144	92	561	93	223	28	40	29226	24978	3492
871	87155	1	1		0	1	0	0	1	2015-04-30	2	Mali 87155	27025	0.72	149	28.5	26612	28.5	6540	9112	9126	5174	23.5	29821	OOR >	2227	19.1	165	743	4260	9154	5938	143	1013	510	441	153	84	339	234	172	336	6701	444	51	156	233	1014	358
871	87156	0	1		0	1	0	0	1	2015-04-30	2	Mali 87156	27494	0.78	68	*0.0	246	*0.0	11749	154	283	336	3.2	89	0.7	462	5.9	33	252	1056	24675	20708	36	162	1275	1186	198	27	78	92	62	262	72	621	100	88	130	20209	202
871	87157	0	2		0	1	0	0	1	2015-04-30	2	Mali 87157	26791	0.69	161	27.5	26365	27.5	1564	1011	361	2978	16	29509	OOR >	851	9.3	88	1484	668	24443	13720	71	387	255	107	122	52	175	206	178	256	249	214	32	39	73	24170	127
871	87158	0	2	10	0	1	0	0	1	2015-04-30	2	Mali 87158	8229	0.18	103	28.4	26588	28.4	3466	744	1080	24720	78.5	29846	OOR >	154	2.5	139	391	538	486	684	83	372	3256	3160	77	94	315	285	156	5071	153	1716	92	126	193	24037	156
871	87159	1	2	8	0	1	0	0	1	2015-04-30	2	Mali 87159	28879	1.18	142	20.9	23431	20.9	641	3204	1468	29373	OOR >	252	1.6	364	4.9	83	722	463	3799	2177	80	921	1881	2263	96	47	217	457	109	878	259	1257	93	46	121	17629	123
871	87160	0	3	11	0	1	0	0	1	2015-04-30	2	Mali 87160	20371	0.36	419	37.2	27845	37.2	1896	834	1109	24243	74.5	28608	OOR >	1641	15.2	343	844	2174	19483	8127	406	691	1542	1075	343	123	625	669	371	24964	405	779	127	126	7423	10164	794
871	87161	0	3	10	0	1	0	0	1	2015-04-30	2	Mali 87161	28399	1.04	99	19.8	22735	19.8	28558	202	678	14473	48.3	20986	49.7	132	2.2	38	3963	17806	6143	2705	67	282	1643	1224	105	37	78	136	202	304	132	518	22	30	28525	23535	1884
871	87162	0	3	11	0	1	0	0	1	2015-04-30	2	Mali 87162	3224	0.11	86	33.3	27466	33.3	6515	752	261	4203	20.4	103	0.8	690	7.9	98	434	28177	2751	842	74	898	245	173	112	60	186	152	75	196	132	234	530	127	52	19611	249
871	87163	1	4	11	0	1	0	0	1	2015-04-30	2	Mali 87163	30039	2.06	138	14.6	18196	14.6	23628	91	330	750	6	29723	OOR >	977	10.3	73	402	675	22619	15791	61	429	3127	2592	117	55	135	352	61	1838	592	750	61	66	250	13148	143
871	87164	0	4	12	0	1	0	0	1	2015-04-30	2	Mali 87164	25568	0.57	151	22.1	24151	22.1	23421	4157	842	25102	86.1	26012	67.3	127	2.2	74	1443	706	22891	3553	114	667	1834	1766	242	43	170	357	178	1559	352	677	82	305	26410	2277	5551
871	87165	0	6	12	0	1	0	0	1	2015-04-30	2	Mali 87165	28566	1.05	202	19.9	22780	19.9	734	146	317	4159	20.2	25932	66.3	536	6.6	61	607	352	4724	4543	66	420	2211	1536	97	38	109	259	77	975	148	342	174	101	27498	3496	1734
871	87166	0	5	12	0	1	0	0	1	2015-04-30	2	Mali 87166	21499	0.39	192	25.4	25676	25.4	1895	107	142	28898	OOR >	29251	OOR >	17242	87.4	298	1427	8472	8775	3573	183	907	981	894	144	157	746	372	156	18137	346	509	106	87	1872	24067	1138
871	87167	1	5	12	0	1	0	0	1	2015-04-30	2	Mali 87167	26894	0.69	74	*0.1	286	*0.1	2698	186	397	289	2.9	27331	OOR >	186	2.9	62	157	971	14259	6416	176	470	819	958	78	103	134	959	165	5838	387	206	43	138	235	24854	316
875	87550	0	1		0	1	0	0	1	2015-04-30	2	Mali 87550	27872	0.82	88	*0.1	304	*0.1	1897	79	255	13635	46.3	24211	57.3	1593	14.8	49	1258	314	12626	1819	81	357	179	135	73	64	63	273	84	1905	133	123	45	29	120	26973	327
875	87551	1	1		0	1	0	0	1	2015-04-30	2	Mali 87551	25004	0.54	150	0.4	811	0.4	742	193	606	25302	OOR >	5686	18.1	2057	18	65	232	728	24574	5775	190	1764	460	274	82	104	158	308	196	8388	129	228	30	39	76	23519	95
875	87552	1	1		0	1	0	0	1	2015-04-30	2	Mali 87552	820	0.03	196	*0.1	358	*0.1	547	67	667	11724	41.7	24819	59.4	255	3.7	47	669	23159	16730	10445	234	581	282	205	117	129	131	338	303	8298	284	274	263	44	150	24382	126
875	87553	0	2		0	1	0	0	1	2015-04-30	2	Mali 87553	27254	0.75	101	7.4	9983	7.4	28285	113	312	329	3.2	27427	OOR >	240	3.6	57	237	568	10083	2914	80	827	571	627	87	35	94	213	56	9342	83	2153	45	34	29747	23778	1461
875	87554	0	2		0	1	0	0	1	2015-04-30	2	Mali 87554	2511	0.09	60	OOR <	106	OOR <	28690	162	513	27111	OOR >	22744	53.4	26066	*118.9	43	957	2876	23589	9751	61	177	292	200	106	35	79	625	50	4683	215	387	142	78	104	23761	153
875	87555	1	2	10	0	1	0	0	1	2015-04-30	2	Mali 87555	23348	0.45	199	OOR <	34	OOR <	30118	149	332	2694	14.9	28293	OOR >	1114	11.4	50	100	957	11661	17112	72	315	1814	1609	93	60	82	561	227	1198	218	918	252	543	276	21620	126
875	87556	1	3	11	0	1	0	0	1	2015-04-30	2	Mali 87556	25366	0.57	107	26.5	26053	26.5	17651	283	222	14000	47.2	295	1.8	383	5.1	55	165	1840	2476	1244	70	453	2949	2872	82	39	242	336	147	24126	392	783	1195	39	25293	5083	801
875	87557	0	3	10	0	1	0	0	1	2015-04-30	2	Mali 87557	2612	0.09	95	*0.0	209	*0.0	3309	294	168	24981	82.5	237	1.5	182	2.9	34	339	791	25077	23413	51	210	2907	2731	86	33	130	346	195	20419	241	2406	84	34	99	25277	1057
875	87558	1	3	11	0	1	0	0	1	2015-04-30	2	Mali 87558	28205	0.92	119	22.8	24543	22.8	28351	366	649	18783	58.1	24386	57.9	295	4.2	160	388	3456	3560	983	89	959	371	238	102	84	304	496	173	3460	271	362	160	95	235	23480	352
875	87559	0	3	10	0	1	0	1	1	2015-04-30	2	Mali 87559	29942	2.04	291	21.9	24031	21.9	5373	662	1175	5059	23.2	29626	OOR >	2166	18.7	164	1935	1251	5553	2567	171	979	222	203	116	55	354	982	169	4534	678	297	118	106	12456	24236	2443
875	87560	0	4	11	0	1	0	1	1	2015-04-30	2	Mali 87560	27207	0.74	107	21.7	23944	21.7	5668	189	246	347	3.3	24546	58.4	105	1.9	72	451	4185	1372	930	70	252	1719	1315	109	60	221	404	112	7957	177	815	91	50	24838	20794	299
875	87561	0	4	10	0	1	0	1	1	2015-04-30	2	Mali 87561	27378	0.74	377	24.3	25261	24.3	1738	359	2006	24256	74.6	11702	31.5	22663	*107.1	253	4675	5561	3394	3205	263	1024	3582	4154	562	170	432	891	1463	12385	1081	1555	125	114	3217	10864	355
875	87562	1	4	11	0	1	0	1	1	2015-05-04	1 rep	Mali 87562	3813	0.12	348	3.6	28255	47.1	649	399	574	31945	OOR >	8121	23.8	622	7.3	379	454	3663	18061	12509	184	1199	9761	8776	153	178	899	833	213	13401	399	6500	533	542	193	28426	267
875	87563	1	4	12	0	1	0	0	1	2015-05-04	1 rep	Mali 87563	32199	>2.39	326	3.4	28139	42.9	18623	498	267	22862	68.5	32335	OOR >	27025	*122.1	276	5522	11712	8805	5608	283	538	2936	2550	108	145	348	365	369	27270	263	843	56	56	32623	24027	1048
875	87564	1	5	12	0	1	0	0	1	2015-05-04	1 rep	Mali 87564	31446	>2.39	140	1.6	-877	OOR <	2655	275	489	15882	51.5	16456	41	179	2.8	44	314	303	3698	2007	198	1441	1943	1643	63	141	192	344	294	26474	1825	415	1555	334	32413	22793	4672
875	87565	0	5	12	0	1	0	0	1	2015-05-04	1 rep	Mali 87565	14899	0.26	68	0.7	28009	39.9	11738	94	191	219	2.3	257	1.6	149	2.5	61	458	419	6229	1988	47	343	169	104	46	35	80	391	63	2130	1062	171	43	39	90	6947	139
880	88050	0	4		0	1	1	1	3	2015-05-04	1 rep	Mali 88050	25372	0.56	61	0.6	28081	41.4	1974	68	722	1148	8.1	2856	10.7	676	7.8	85	271	600	30833	746	47	-258	717	432	108	470	892	853	94	7432	833	488	34	35	13787	3756	495
880	88051	0	5	10	0	1	1	1	3	2015-05-04	1 rep	Mali 88051	30519	>2.39	52	0.4	26961	30.1	13007	116	498	9591	36.2	1895	7.8	6697	43.3	60	596	1568	3369	1393	103	383	121	107	58	33	45	1451	95	19809	575	96	134	534	25352	2982	9748
880	88052	1	3	9	0	1	0	1	2	2015-05-04	1 rep	Mali 88052	30018	2.09	80	0.9	-637	OOR <	118	118	509	544	4.7	29347	OOR >	370	5	25	4179	4440	8654	2747	105	2751	163	192	98	73	77	491	160	560	196	140	25	17	28959	23490	7209
880	88053	1	5	10	0	1	1	1	3	2015-05-04	1 rep	Mali 88053	4494	0.13	100	1.2	27142	31.1	213	215	316	3532	18	908	4.4	4297	31.1	193	224	913	4595	1735	386	873	263	224	170	236	388	457	484	290	179	218	112	70	30480	22852	2527
880	88054	0	5	10	0	1	1	1	3	2015-05-04	1 rep	Mali 88054	31965	>2.39	175	2	-659	OOR <	417	1254	1520	304	3	864	4.3	157	2.6	64	2659	1686	4338	1977	223	875	394	232	84	108	91	1094	320	8457	18724	701	1522	120	250	215	235
880	88055	1	5	11	0	1	1	1	3	2015-05-04	1 rep	Mali 88055	17101	0.29	60	0.6	28368	54.7	405	143	134	295	2.9	357	2.1	220	3.3	232	783	1450	2294	1692	464	715	152	167	51	181	244	434	380	285	120	166	46	76	28037	17452	4202
880	88056	1	6	12	0	1	1	1	3	2015-05-04	1 rep	Mali 88056	1217	0.05	147	1.7	27817	36.8	212	4570	6438	2261	13.2	115	0.8	2240	19.1	130	281	2368	3814	3409	397	739	391	264	66	267	311	843	541	4831	1550	349	216	166	28601	6182	2483
880	88057	1	4		0	1	1	1	3	2015-05-04	1 rep	Mali 88057	29093	1.35	145	1.7	26727	29	65	501	675	30099	OOR >	510	2.8	29819	*131.3	83	502	17267	1042	3401	162	895	581	554	138	103	167	464	227	18322	14460	350	39	44	32103	15751	11352
880	88058	1	2		0	1	1	1	3	2015-05-04	1 rep	Mali 88058	4029	0.13	65	0.6	27264	31.8	96	251	465	136	1.5	142	1	81	1.5	115	615	27421	13507	21472	80	151	207	127	81	61	153	356	94	478	126	154	29	37	31805	29472	2854
880	88059	0	5	11	0	1	1	1	3	2015-05-04	1 rep	Mali 88059	1323	0.05	60	0.6	25928	26.1	147	257	259	119	1.3	173	1.2	90	1.6	53	246	599	5296	3126	79	242	137	96	50	35	62	401	55	5417	146	81	278	52	8905	1689	212
880	88060	1	1		0	1	1	1	3	2015-05-04	1 rep	Mali 88060	31502	>2.39	27	OOR <	-1330	OOR <	21	209	508	13	OOR <	23	0.1	15	0.2	17	300	579	12930	7111	28	15	206	112	24	18	67	159	47	309	35	208	5686	86	27929	17505	18469
880	88061	1	6	14	0	1	1	1	3	2015-05-04	1 rep	Mali 88061	20967	0.38	88	1	27930	38.5	49	144	381	14683	48.8	700	3.6	11353	64.1	253	500	4438	1096	818	152	821	200	158	71	100	309	364	101	372	195	174	60	52	30080	22624	527
880	88062	1	5	12	0	1	1	1	3	2015-05-04	1 rep	Mali 88062	1969	0.07	82	0.9	28229	45.9	152	167	192	26454	OOR >	16091	40.3	257	3.7	161	727	2162	1508	954	173	733	206	146	66	55	239	800	130	2585	541	278	37	37	20104	4102	17311
880	88063	1	3	9	0	1	1	1	3	2015-05-04	1 rep	Mali 88063	28298	0.97	69	0.7	28695	OOR >	43	68	338	13642	46.3	684	3.5	4657	33	151	2164	1066	1628	1651	86	277	205	162	78	84	238	240	104	191	167	295	68	59	32246	24943	1522
880	88064	1	1	7	0	1	1	1	3	2015-05-04	1 rep	Mali 88064	3720	0.12	138	1.6	28669	OOR >	9396	94	262	1590	10.2	305	1.9	1062	11	201	6631	653	8059	13392	240	1326	1286	1052	88	196	405	437	371	463	180	2175	217	139	30405	23046	1425
880	88065	0	1		0	1	1	1	3	2015-05-04	1 rep	Mali 88065	28218	0.92	25	OOR <	-1565	OOR <	74	343	867	1871	11.5	49	0.4	1615	15	20	279	1036	6296	3944	30	195	108	53	43	24	30	130	50	142	58	148	5	17	31253	26479	702
880	88066	1	6	12	0	1	1	1	3	2015-05-04	1 rep	Mali 88066	26774	0.68	46	0.3	-1338	OOR <	175	838	903	2142	12.7	29182	OOR >	174	2.8	15	852	2401	5342	3575	43	-162	99	71	32	69	57	148	64	489	54	95	23	36	18722	13165	13073
880	88067	1	1		0	1	1	1	3	2015-05-04	1 rep	Mali 88067	23839	0.49	19	OOR <	-1452	OOR <	14	309	350	268	2.7	393	2.3	315	4.4	29	1487	5030	1025	6581	61	-61	99	74	23	19	23	65	31	284	191	114	18	13	21566	28119	923
880	88068	0	5	13	0	1	1	1	3	2015-05-04	1 rep	Mali 88068	237	0.01	127	1.5	25371	24.6	61	407	498	6458	27.5	966	4.6	5605	37.9	49	657	12481	2550	1274	36	780	144	99	44	37	156	658	179	628	183	111	61	47	11260	9601	136
880	88069	0	2		0	1	1	1	3	2015-05-04	1 rep	Mali 88069	29873	2.09	31	OOR <	-1263	OOR <	97	605	571	79	0.8	245	1.6	51	1	25	623	1283	6946	2027	145	488	244	214	39	108	64	195	194	369	45	396	22	79	28276	25668	674
889	88950	0	1		0	1	0	1	2	2015-05-04	1 rep	Mali 88950	3408	0.11	64	0.6	26433	27.8	18984	283	462	354	3.4	21631	51	158	2.6	53	3739	26224	25411	24585	48	811	643	450	79	457	253	383	139	370	248	437	308	436	31736	29405	5241
889	88951	0	1		0	1	1	1	3	2015-05-04	1 rep	Mali 88951	3723	0.12	314	3.3	28534	OOR >	417	1752	1810	32016	OOR >	32268	OOR >	5839	39.1	509	818	5057	17992	5150	216	802	635	467	215	210	936	970	378	9374	1406	660	106	104	32176	27000	26944
889	88952	0	1	6	0	1	1	1	3	2015-05-04	1 rep	Mali 88952	26110	0.62	41	0.2	27748	36	4389	1875	2296	29806	OOR >	145	1	302	4.2	45	824	2850	4276	1364	28	2867	183	135	41	34	80	148	32	141	59	184	27	16	432	209	149
889	88953	0	1	4	0	1	0	1	2	2015-05-04	1 rep	Mali 88953	86	0.004	24	OOR <	-1482	OOR <	4663	798	1280	138	1.5	7707	22.9	367	4.9	27	259	261	26444	25930	27	243	178	122	49	16	50	145	65	122	61	216	176	86	43	29074	66
889	88954	0	1	4	0	1	1	1	3	2015-05-04	1 rep	Mali 88954	13301	0.24	34	OOR <	28020	40.1	1950	770	653	470	4.2	22	0.1	44	0.9	36	830	2512	29772	28421	51	168	366	138	22	34	78	109	63	738	41	211	18	25	31612	27867	4387
889	88955	1	1		0	1	0	1	2	2015-05-04	1 rep	Mali 88955	26061	0.6	129	1.5	28162	43.6	6867	95	252	28106	OOR >	32113	OOR >	19387	95.4	185	23730	28547	24121	10807	116	558	1150	860	495	98	333	983	188	471	485	547	43	62	31884	20874	26016
889	88956	1	1		0	1	0	1	2	2015-05-04	1 rep	Mali 88956	1998	0.07	47	0.3	-1162	OOR <	2572	8402	9457	22913	68.6	31440	OOR >	8810	53.1	38	7551	9230	11582	4971	36	1717	166	112	75	29	76	362	172	341	114	220	16	18	31100	30116	30223
889	88957	0	2		0	1	1	1	3	2015-05-04	1 rep	Mali 88957	25430	0.57	260	2.8	24885	23.5	790	2229	2796	9114	35	29597	OOR >	4436	31.9	196	1201	1821	29154	19270	291	918	283	185	123	118	223	1673	228	590	904	514	90	60	23581	29021	16545
889	88958	0	2	8	0	1	1	1	3	2015-05-04	1 rep	Mali 88958	31627	>2.39	98	1.1	24030	21.9	9354	647	5953	30469	OOR >	32211	OOR >	279	4	36	4929	6050	27553	24610	44	1088	432	125	91	219	71	201	79	350	498	216	26	29	31331	26695	1824
889	88959	0	2		0	1	0	1	2	2015-05-04	1 rep	Mali 88959	29678	1.79	346	3.5	-479	OOR <	26384	1368	2321	534	4.6	31707	OOR >	834	9.1	323	2427	14937	30600	3263	266	1057	8006	6526	177	102	531	430	396	762	319	7053	120	107	32129	25700	14761
889	88960	0	2		0	1	1	1	3	2015-05-04	1 rep	Mali 88960	6374	0.16	119	1.4	27574	34.2	1387	131	127	24721	78.5	31955	OOR >	19035	94.1	185	2802	10524	26600	7953	69	1574	330	216	341	92	334	253	245	516	255	384	33	33	25962	28216	945
889	88961	0	3		0	1	1	1	3	2015-05-04	1 rep	Mali 88961	29858	1.92	29	OOR <	27010	30.3	582	97	144	936	7	31733	OOR >	220	3.3	44	1319	265	6042	5362	54	376	2318	1867	44	59	107	172	92	138	79	1228	35	25	31889	25383	4664
889	88962	0	3	10	0	1	0	1	1	2015-05-04	1 rep	Mali 88962	704	0.03	125	1.5	28670	OOR >	1242	968	1233	31780	OOR >	29530	OOR >	4238	30.8	373	737	2163	26824	14018	300	1353	505	355	142	344	711	374	395	449	544	401	78	500	31866	22568	3464
889	88963	0	4		0	1	0	1	2	2015-05-04	1 rep	Mali 88963	28939	1.26	114	1.3	28521	OOR >	4406	343	654	28408	OOR >	31508	OOR >	4084	30	100	1701	15032	27515	11804	105	519	3401	1389	952	54	249	887	100	484	608	429	55	218	31131	11896	23982
889	88964	0	4		0	1	0	1	2	2015-05-04	1 rep	Mali 88964	122	0.004	33	OOR <	-1782	OOR <	163	119	210	9419	35.8	31794	OOR >	2963	23.6	41	386	1233	4112	4018	67	-146	10385	9506	2728	27	80	158	50	225	433	5520	18	18	32369	28486	31046
889	88965	0	4	10	0	1	1	1	3	2015-05-04	1 rep	Mali 88965	21418	0.39	84	0.9	11181	8.4	736	674	1830	30945	OOR >	31823	OOR >	1413	13.6	56	2597	8659	23983	4337	80	1501	238	141	95	45	339	215	103	167	224	119	23	175	31829	26139	7761
889	88966	0	5	10	0	1	0	1	2	2015-05-04	1 rep	Mali 88966	21929	0.41	153	1.8	28089	41.6	1291	84	260	31695	OOR >	20201	48.1	30798	*134.5	249	2323	1174	8122	5258	114	487	2183	1973	87	112	3334	340	343	619	320	1344	76	186	30252	20787	2155
889	88967	1	6	13	0	1	1	1	3	2015-05-04	1 rep	Mali 88967	8508	0.18	235	2.6	28266	47.6	32017	260	420	28594	OOR >	12048	32.2	29106	*129.0	96	456	2512	28782	27034	116	7950	511	290	159	99	281	1648	222	754	692	499	42	62	32119	26122	22421
889	88968	0	6	12	0	1	1	1	3	2015-05-04	1 rep	Mali 88968	30321	2.39	210	2.3	27580	34.2	851	841	304	27781	OOR >	30805	OOR >	1748	15.9	77	1062	2311	1966	1075	83	1966	3139	2997	192	49	223	1805	122	354	3920	1027	40	91	31429	11422	5048
889	88969	0	6		0	1	1	1	3	2015-05-04	2 rep	Mali 88969	1095	0.04	337	3.5	29338	OOR >	371	132	593	31283	OOR >	32044	OOR >	736	8.3	361	3758	27266	24498	7915	172	966	939	534	198	116	768	484	239	706	413	417	93	96	8776	999	5430
895	89550	0	4		0	1	0	1	2	2015-05-04	2 rep	Mali 89550	31253	>2.39	351	3.6	30572	OOR >	3519	372	2206	26455	OOR >	32120	OOR >	3314	25.6	782	6962	18825	883	1020	1306	1836	670	505	281	384	1268	392	400	606	809	531	334	238	30910	2884	5706
895	89551	0	4		0	1	0	1	2	2015-05-04	2 rep	Mali 89551	28941	1.24	362	3.7	28816	OOR >	611	1681	439	31351	OOR >	31325	OOR >	30497	*133.6	271	1443	4746	9843	2222	127	1191	791	580	163	104	442	279	244	652	811	447	160	111	31277	3476	7289
895	89552	0	4		0	1	0	0	2	2015-05-04	2 rep	Mali 89552	26842	0.7	259	2.8	30502	OOR >	678	197	865	23944	72.8	31401	OOR >	165	2.7	710	2665	3254	28675	16626	297	1293	1085	954	208	276	930	229	320	12365	533	1005	211	405	32135	27180	4146
895	89553	0	4		0	1	0	1	2	2015-05-04	2 rep	Mali 89553	28625	1.14	270	2.9	29298	OOR >	198	575	367	20599	62.3	31598	OOR >	14578	77.2	107	263	815	25909	7600	337	750	266	204	201	156	267	575	373	514	257	299	57	109	400	27314	808
895	89554	0	4		0	1	0	1	2	2015-05-04	2 rep	Mali 89554	4569	0.14	82	0.9	30096	OOR >	97	292	1189	4754	22.2	27148	OOR >	581	7	112	313	1591	8799	2518	56	465	1481	1206	113	44	257	797	111	171	158	811	32	41	31273	6203	9820
895	89555	0	6		0	1	0	1	2	2015-05-04	2 rep	Mali 89555	32154	>2.39	87	1	30572	OOR >	611	1071	942	24655	77.8	25069	60.5	548	6.7	137	3967	1097	1090	935	185	654	406	310	94	110	213	436	183	306	181	636	39	42	32372	17574	30538
895	89556	0	6		0	1	0	0	2	2015-05-04	2 rep	Mali 89556	32466	>2.39	202	2.3	26578	28.3	11804	68	117	19168	58.9	31808	OOR >	124	2.1	80	631	1925	13512	5744	58	449	335	264	113	30	100	93	77	986	188	185	43	70	32130	6775	6162
895	89557	0	6	12	0	1	0	1	2	2015-05-04	2 rep	Mali 89557	32501	>2.39	118	1.4	10524	7.9	432	4902	1417	32465	OOR >	32398	OOR >	32363	*139.6	68	3182	25339	24532	8016	174	642	331	188	109	100	112	363	243	435	343	169	37	46	31443	21212	945
895	89558	1	4		0	1	0	1	2	2015-05-04	2 rep	Mali 89558	4220	0.13	118	1.4	270	*0.1	625	196	226	2121	12.6	30542	OOR >	1642	15.2	57	232	9064	20113	5957	53	366	5291	4265	86	84	135	183	75	412	1144	3438	47	2333	32238	28540	4242
895	89559	0	6		0	1	0	1	2	2015-05-04	2 rep	Mali 89559	31617	>2.39	335	3.4	27630	34.7	285	742	421	29113	OOR >	32209	OOR >	10914	62.2	384	836	9978	5488	3678	406	2384	547	441	202	223	533	1146	1236	370	1188	452	378	143	32025	13654	4371
895	89560	1	6		0	1	0	0	2	2015-05-04	2 rep	Mali 89560	32209	>2.39	160	1.8	29424	OOR >	263	5141	236	3711	18.7	32169	OOR >	109	1.9	125	456	2167	5781	2806	65	502	297	173	100	41	162	174	132	527	114	179	832	56	180	28544	225
895	89561	0	6		0	1	0	1	2	2015-05-04	2 rep	Mali 89561	31791	>2.39	173	2	25198	24.2	2966	496	539	27684	OOR >	25290	61.5	26700	*121.0	115	1841	6371	15190	10141	72	533	350	188	130	731	188	246	390	2612	511	189	41	82	32186	25925	19535
895	89562	1	6	10	0	1	0	1	2	2015-05-04	2 rep	Mali 89562	31543	>2.39	152	1.8	29726	OOR >	873	387	253	1376	9.2	31864	OOR >	1156	11.7	201	3200	2975	5022	2794	90	820	337	276	111	126	284	237	173	309	341	366	81	116	396	28659	249
895	89563	0	6	12	0	1	0	1	2	2015-05-04	2 rep	Mali 89563	31705	>2.39	222	2.5	29280	OOR >	3411	789	734	32131	OOR >	31745	OOR >	31860	*138.0	193	414	2208	23710	9877	166	705	329	188	1147	104	232	327	4975	445	488	332	71	75	32002	26057	2132
895	89564	1	6		0	1	0	1	2	2015-05-04	2 rep	Mali 89564	31789	>2.39	331	3.4	629	0.3	882	222	257	24446	75.9	25991	67	529	6.5	36	457	1748	29725	21623	51	539	228	126	99	19	178	338	150	1444	264	137	29	52	497	29382	6425
895	89565	0	6	13	0	1	0	1	2	2015-05-04	2 rep	Mali 89565	31760	>2.39	67	0.7	23779	21.4	66	109	229	93	0.9	30921	OOR >	64	1.2	74	851	1537	14413	7081	79	601	448	277	89	59	108	433	133	268	151	182	111	724	31742	28554	1637
895	89566	1	6	13	0	1	0	1	2	2015-05-04	2 rep	Mali 89566	31446	>2.39	676	5.9	28233	46.1	1261	274	363	28436	OOR >	31755	OOR >	845	9.2	79	3625	29326	22780	12244	62	1643	380	329	149	36	136	362	203	414	485	408	84	48	150	28474	368
895	89567	0	4		0	1	0	0	2	2015-05-04	2 rep	Mali 89567	559	0.02	179	2	572	*0.2	488	822	438	31486	OOR >	31605	OOR >	28800	*128.0	59	451	3793	1565	560	101	866	277	256	186	76	435	787	820	14185	6303	207	69	60	4766	117	315
895	89568	1	2		0	1	0	1	2	2015-05-04	2 rep	Mali 89568	712	0.03	193	2.2	10092	7.5	785	1331	555	31901	OOR >	32182	OOR >	31707	*137.5	80	287	3997	11559	1599	116	8937	174	119	444	18	96	272	102	528	402	149	81	144	31745	11215	10318
895	89569	1	4		0	1	0	1	2	2015-05-04	2 rep	Mali 89569	10270	0.2	189	2.1	354	*0.1	1534	1280	1261	31577	OOR >	32085	OOR >	1089	11.2	86	1627	853	1661	1160	138	714	158	119	155	54	246	455	230	7720	2302	161	109	461	32137	27237	6155
899	89950	0	4		0	1	0	0	1	2015-05-04	2 rep	Mali 89950	12010	0.22	80	0.9	29688	OOR >	1243	135	145	30058	OOR >	31272	OOR >	28229	*126.1	180	285	473	3531	1703	56	878	234	180	131	190	250	317	99	827	223	218	43	65	1462	25747	291
899	89951	0	4		0	1	0	1	2	2015-05-04	2 rep	Mali 89951	23768	0.47	360	3.7	29310	OOR >	1171	1081	787	32273	OOR >	32256	OOR >	23986	*111.7	407	918	987	16931	9802	170	881	1092	671	140	255	672	800	6519	732	647	396	445	442	30427	27684	2026
899	89952	1	4		0	1	0	1	2	2015-05-04	2 rep	Mali 89952	29536	1.68	883	7.2	427	*0.1	308	284	201	30912	OOR >	32219	OOR >	5567	37.7	45	1744	2570	17263	6586	102	858	282	229	106	68	92	134	143	334	133	151	27	59	116	21498	56
899	89953	1	4		0	1	0	0	1	2015-05-04	2 rep	Mali 89953	3134	0.11	255	2.8	29414	OOR >	1223	1559	439	4249	20.5	31731	OOR >	13275	72	146	3061	13510	3680	1765	2478	792	178	139	129	40	199	6664	16243	340	351	156	76	963	31205	26528	28950
899	89954	0	4		0	1	0	1	2	2015-05-04	2 rep	Mali 89954	9396	0.19	180	2	28403	59.1	3313	6733	5240	451	4.1	29510	OOR >	488	6.1	203	283	5598	21844	12906	101	676	722	523	115	108	291	283	127	390	250	507	62	54	31509	11638	3528
899	89955	0	4		0	1	0	0	2	2015-05-04	2 rep	Mali 89955	1217	0.04	190	2.1	25651	25.3	2248	781	1237	31665	OOR >	31654	OOR >	31688	*137.4	95	439	26181	1341	1033	92	677	1485	2088	157	43	381	292	195	2335	1333	548	164	162	30482	4500	582
899	89956	0	4		0	1	0	0	2	2015-05-04	2 rep	Mali 89956	16252	0.28	82	0.9	28963	OOR >	150	459	226	31844	OOR >	31878	OOR >	9938	58	48	147	1680	15051	2548	63	593	276	160	112	38	92	336	149	399	239	193	35	39	31759	22477	2976
899	89957	0	4		0	1	0	1	2	2015-05-04	2 rep	Mali 89957	30902	>2.39	114	1.3	28766	OOR >	330	275	174	643	5.3	31801	OOR >	729	8.3	54	438	9719	24312	4870	31	521	263	127	98	35	94	338	753	335	1107	312	8334	82	3378	207	406
899	89958	0	4		0	1	0	0	2	2015-05-04	2 rep	Mali 89958	30387	>2.39	161	1.9	28898	OOR >	1711	313	152	32269	OOR >	32152	OOR >	32227	*139.1	169	1324	23704	7255	3669	90	1175	764	680	124	73	241	283	190	457	2328	454	52	69	24193	1717	8247
899	89959	1	4		0	1	0	0	2	2015-05-04	2 rep	Mali 89959	240	0.01	91	1	29319	OOR >	2127	181	393	29065	OOR >	29407	OOR >	29079	*128.9	60	1426	29618	30604	28213	65	1922	2870	2481	208	34	93	333	116	1139	183	7694	40	47	1548	1500	1168
899	89960	1	5	14	0	1	0	1	2	2015-05-04	2 rep	Mali 89960	3661	0.12	63	0.6	23321	20.7	365	9945	145	28404	OOR >	31934	OOR >	2944	23.5	45	1116	894	14139	3636	309	557	130	64	49	6	62	3084	4683	215	58	79	224	265	30020	10461	696
899	89961	0	6	17	0	1	0	1	2	2015-05-04	2 rep	Mali 89961	27405	0.77	140	1.6	29059	OOR >	2276	290	348	18615	57.7	31543	OOR >	452	5.8	126	2109	6033	6616	1575	89	890	665	607	138	30	259	697	465	1532	520	266	59	51	32045	7072	8519
899	89962	0	5		0	1	0	1	2	2015-05-04	2 rep	Mali 89962	5478	0.15	134	1.6	3827	2.6	565	1164	790	9887	37	31706	OOR >	10030	58.4	100	419	21275	4625	4617	65	721	204	133	48	41	210	169	147	344	119	140	59	271	26843	620	3830
899	89963	1	5		0	1	0	0	1	2015-05-04	2 rep	Mali 89963	31589	>2.39	99	1.1	260	*0.0	222	4761	6701	17009	54.1	18944	45.7	1011	10.6	35	495	1007	6008	1987	494	682	5189	5192	70	12	78	401	60	285	359	3864	29	24	23152	14018	3013
899	89964	1	5		0	1	0	1	2	2015-05-04	2 rep	Mali 89964	25736	0.59	25202	99.7	26336	27.4	139	627	707	5989	26.1	30458	OOR >	2462	20.5	66	2895	3083	1113	602	478	153	201	150	46	27	74	222	80	207	103	108	22	27	23251	8655	1124
899	89965	0	5	14	0	1	0	1	2	2015-05-04	2 rep	Mali 89965	24605	0.52	52	0.4	28363	54.2	142	328	477	28409	OOR >	30389	OOR >	3307	25.6	67	247	1229	8212	1493	63	329	181	219	105	40	85	240	97	4337	91	201	291	168	138	17563	83
899	89966	0	6	12	0	1	0	1	2	2015-05-04	2 rep	Mali 89966	961	0.03	183	2.1	26845	29.5	4338	2662	1270	30735	OOR >	31823	OOR >	23974	*111.7	74	869	27568	15142	11783	84	637	512	358	212	59	3112	852	2749	518	982	375	61	68	23019	25408	1205
899	89967	0	6	12	0	1	0	1	2	2015-05-04	2 rep	Mali 89967	14489	0.25	330	3.4	29370	OOR >	174	1322	276	31547	OOR >	31941	OOR >	31449	*136.6	312	221	600	22841	9697	114	585	550	467	181	121	463	210	154	422	28886	291	175	94	30649	14828	551
899	89968	1	6	13	0	1	0	1	2	2015-05-04	2 rep	Mali 89968	31937	>2.39	203	2.3	351	*0.1	354	3749	560	28653	OOR >	31157	OOR >	6663	43.1	31	481	7735	26177	22834	62	464	604	326	57	84	59	185	82	413	117	357	21	69	31966	26603	2955
899	89969	1	6	14	0	1	0	1	2	2015-05-04	2 rep	Mali 89969	31973	>2.39	404	4	22564	19.6	480	396	493	27889	OOR >	31876	OOR >	2739	22.2	83	1960	25295	4773	5114	74	591	237	172	136	53	135	148	3559	638	468	151	289	275	29742	12033	4439
907	90750	0	5	12	0	1	0	1	2	2015-05-04	2 rep	Mali 90750	148	0.004	264	2.8	26435	27.8	428	183	364	27950	OOR >	30189	OOR >	1093	11.2	104	351	3647	6361	1631	173	343	198	208	132	65	195	254	14540	335	162	187	45	54	31790	4217	7911
907	90751	0	5		0	1	0	1	2	2015-05-04	2 rep	Mali 90751	32007	>2.39	216	2.4	-366	OOR <	37	90	210	8194	32.5	24456	58.1	2239	19.1	35	318	770	4039	2903	45	86	56	27	38	7	76	148	84	187	150	41	34	42	76	82	60
907	90752	0	5		0	1	0	1	2	2015-05-06	1	Mali 90752	26603	0.67	186	2.1	219	*0.0	501	744	340	29727	OOR >	31363	OOR >	14385	76.4	82	8369	8532	6578	2978	76	311	2739	2208	122	92	116	313	127	305	248	670	172	49	29591	28521	3759
907	90753	0	5	10	0	1	0	1	2	2015-05-06	1	Mali 90753	16287	0.28	92	1	5698	4	16365	254	312	20090	61.1	31436	OOR >	24999	*115.2	50	322	6400	11247	3323	52	173	108	63	72	27	86	162	156	287	551	67	27	29	331	142	265
907	90754	0	5		0	1	0	1	2	2015-05-06	1	Mali 90754	19908	0.35	80	0.9	-12	OOR <	789	99	173	28726	OOR >	29641	OOR >	29020	*128.7	32	518	4194	1596	1058	39	381	71	58	60	59	88	487	76	345	252	110	23	118	30926	23495	2920
907	90755	1	5	11	0	1	0	1	2	2015-05-06	1	Mali 90755	437	0.02	38	0.1	26100	26.6	463	63	108	29313	OOR >	30956	OOR >	29324	*129.7	50	127	2364	1691	498	54	326	1107	1031	58	47	59	154	63	2880	139	479	20	17	31368	23089	1755
907	90756	1	5		0	1	0	1	2	2015-05-06	1	Mali 90756	30021	2.27	95	1.1	27313	32.1	116	2304	2761	128	1.4	29026	OOR >	128	2.2	41	600	1034	975	722	92	308	129	87	36	55	102	357	181	225	194	145	24	17	24143	23761	731
907	90757	1	5		0	1	0	1	2	2015-05-06	1	Mali 90757	1710	0.06	171	2	208	*0.0	174	707	795	30371	OOR >	26805	OOR >	11222	63.5	94	972	25150	6796	2913	175	3034	101	71	72	55	202	397	418	313	319	96	23	16	66	91	69
907	90758	1	5		0	1	0	0	2	2015-05-06	1	Mali 90758	1690	0.05	297	3.1	218	*0.0	579	4118	3392	443	4	339	2	79	1.5	26	1433	24724	1761	1166	31	331	517	462	69	24	119	237	79	283	156	86	45	77	23959	21573	12551
907	90759	1	5	12	0	1	0	1	2	2015-05-06	1	Mali 90759	26998	0.72	241	2.6	821	0.4	776	300	343	30941	OOR >	31163	OOR >	30466	*133.5	77	2998	11850	18687	3269	207	538	135	100	103	25	83	282	113	2189	186	143	151	128	27408	8152	24069
907	90760	0	5	13	0	1	0	1	2	2015-05-06	1	Mali 90760	1887	0.07	58	0.5	27128	31	3015	113	76	23368	70.3	30288	OOR >	427	5.5	51	1290	2241	10241	6774	34	464	900	760	75	42	194	299	629	344	3368	263	16	65	25561	6968	2931
907	90761	0	5	9	0	1	0	1	2	2015-05-06	1	Mali 90761	25943	0.61	68	0.7	19119	15.6	5442	537	716	30353	OOR >	31529	OOR >	30384	*133.2	54	249	887	24655	11730	39	303	215	113	87	34	100	122	102	331	168	139	34	36	30505	23375	1252
907	90762	0	5	9	0	1	0	1	2	2015-05-06	1	Mali 90762	193	0.006	144	1.7	28792	OOR >	564	1990	1857	26044	OOR >	24305	57.6	14346	76.3	255	1053	23841	21780	19448	152	763	350	249	138	85	569	266	460	359	462	256	385	178	31176	15680	6008
907	90763	0	6	12	0	1	0	1	2	2015-05-06	1	Mali 90763	29985	2.02	129	1.5	-161	OOR <	113	98	130	29721	OOR >	30207	OOR >	29665	*130.8	79	134	149	698	486	64	25412	487	415	132	49	147	179	137	388	582	508	49	51	2807	6971	2238
907	90764	0	6	11	0	1	0	1	2	2015-05-06	1	Mali 90764	16952	0.29	72	0.8	25395	24.7	392	286	388	26853	OOR >	713	3.7	5984	39.8	46	194	987	8020	3179	54	368	178	98	76	33	120	263	394	214	217	119	41	31	811	52	67
907	90765	0	6	11	0	1	0	1	2	2015-05-06	1	Mali 90765	14742	0.26	96	1.1	26113	26.7	446	78	111	260	2.6	30272	OOR >	57	1.1	53	486	8419	13875	3233	47	347	146	94	106	32	93	165	207	266	274	87	24	37	31117	6038	506
907	90766	1	6		0	1	0	1	2	2015-05-06	1	Mali 90766	9992	0.2	438	4.3	119	OOR <	2741	1474	215	31585	OOR >	31190	OOR >	31097	*135.5	119	1149	20541	26616	17415	113	4401	241	123	178	75	573	259	270	833	4319	177	43	51	31128	17250	1849
907	90767	1	6	12	0	1	0	1	2	2015-05-06	1	Mali 90767	23950	0.48	143	1.7	25464	24.8	4825	28659	2217	25307	OOR >	31143	OOR >	8030	49.5	111	1890	2978	13323	6530	380	733	267	202	98	67	254	881	379	553	415	166	66	50	27352	13759	1262
907	90768	1	6	13	0	1	0	1	2	2015-05-06	1	Mali 90768	29365	1.47	213	2.4	29324	OOR >	2317	243	270	2003	12.1	30816	OOR >	459	5.8	501	2913	8360	3464	2909	274	745	451	430	254	189	600	883	366	483	886	460	103	81	30710	22118	25119
907	90769	1	4	9	0	1	0	1	2	2015-05-06	1	Mali 90769	282	0.01	127	1.5	25784	25.7	263	230	451	31359	OOR >	30972	OOR >	30791	*134.5	110	1876	10438	3338	2381	97	719	220	124	119	59	172	522	273	342	367	157	65	122	27852	6266	2230
913	91350	0	5		0	1	0	1	2	2015-05-06	1	Mali 91350	131	0.005	58	0.5	23145	20.4	345	333	105	18615	57.7	29439	OOR >	2611	21.5	60	1993	24279	1669	1152	61	180	321	307	41	40	240	122	66	190	195	150	30	37	58	19271	67
913	91351	0	6		0	1	0	1	2	2015-05-06	1	Mali 91351	23844	0.48	87	1	25754	25.6	334	26449	298	28141	OOR >	24062	56.9	4830	33.9	116	226	717	1804	775	83	973	203	119	97	47	304	311	212	197	206	200	45	102	30397	24184	1821
913	91352	0	2		0	1	0	1	2	2015-05-06	1	Mali 91352	11904	0.22	81	0.9	-24	OOR <	822	247	316	29834	OOR >	30755	OOR >	1665	15.3	55	1334	23856	24950	19030	219	414	187	150	89	146	153	619	585	155	336	130	50	168	9089	23609	758
913	91353	1	5		0	1	0	1	2	2015-05-06	1	Mali 91353	7154	0.17	74	0.8	27861	37.4	111	118	199	1647	10.5	24481	58.2	534	6.5	122	221	1081	1593	678	97	280	213	146	73	124	160	289	146	144	169	231	62	152	29409	21636	2642
913	91354	0	4		0	1	0	1	2	2015-05-06	1	Mali 91354	2164	0.07	109	1.3	25052	23.9	243	157	484	13949	47	27652	OOR >	423	5.5	268	1423	23214	7928	2945	101	466	669	560	116	86	349	1016	176	152	434	341	62	59	25314	24102	254
913	91355	0	4		0	1	0	1	2	2015-05-06	1	Mali 91355	141	0.005	55	0.5	24215	22.2	538	63	161	93	0.9	7101	21.5	104	1.8	57	191	771	24521	2977	26	336	148	67	68	16	89	290	64	105	89	88	36	52	158	25765	139
913	91356	1	4		0	1	0	1	2	2015-05-06	1	Mali 91356	23975	0.49	36	OOR <	11260	8.5	41	32	225	958	7.1	24599	58.6	753	8.5	32	164	243	3246	7304	31	147	42	39	38	25	59	182	59	168	95	39	15	6	22282	21110	1653
913	91357	1	4		0	1	0	1	2	2015-05-06	1	Mali 91357	15082	0.26	146	1.7	28623	OOR >	1037	180	275	8211	32.5	24943	59.9	1692	15.5	53	18271	13220	7855	3314	36	849	991	704	96	28	78	214	61	285	636	419	31	47	50	19034	139
913	91358	1	1		0	1	0	1	2	2015-05-06	1	Mali 91358	14739	0.26	75	0.8	36	OOR <	434	563	334	25929	OOR >	29704	OOR >	381	5.1	33	336	8708	12904	1396	35	301	156	154	305	64	140	146	45	541	175	158	20	15	30085	24100	2759
913	91359	0	1		0	1	0	1	2	2015-05-06	1	Mali 91359	27113	0.71	67	0.7	24579	22.9	45	545	165	26861	OOR >	30269	OOR >	7135	45.4	59	446	503	23915	4549	61	552	183	80	172	27	113	156	804	121	90	122	18	14	28804	24625	630
913	91360	1	3		0	1	1	1	3	2015-05-06	1	Mali 91360	273	0.01	66	0.7	23964	21.8	132	48	69	4618	21.7	26370	*79.2	5880	39.3	71	268	399	4185	2914	44	170	92	81	136	30	145	94	168	74	88	91	22	73	21747	328	239
913	91361	0	3		0	1	1	1	3	2015-05-06	1	Mali 91361	688	0.02	157	1.8	26862	29.6	975	178	199	24776	79.2	217	1.4	544	6.6	140	223	1956	3739	1975	74	290	273	242	84	40	180	201	214	146	209	155	32	25	76	18194	85
913	91362	1	6		0	1	0	1	2	2015-05-06	1	Mali 91362	265	0.01	173	2	28380	56	292	457	322	30711	OOR >	24264	57.5	30382	*133.2	423	543	2520	5919	1864	146	448	756	638	190	134	576	439	194	276	390	903	110	86	27913	24151	15293
913	91363	0	1		0	1	0	1	2	2015-05-06	1	Mali 91363	2733	0.1	124	1.4	26924	29.9	2832	555	888	30633	OOR >	28303	OOR >	30098	*132.3	84	662	794	10122	2603	66	383	269	126	133	250	141	294	160	180	125	207	53	52	30124	23563	11438
913	91364	0	5		0	1	0	1	2	2015-05-06	1	Mali 91364	83	0.004	200	2.2	16271	12.8	341	91	121	30907	OOR >	26776	OOR >	29746	*131.1	75	807	1364	3036	1355	58	432	139	136	114	56	7367	275	127	215	412	164	62	91	2018	17486	845
913	91365	0	3		0	1	0	1	2	2015-05-06	1	Mali 91365	26732	0.66	60	0.6	24240	22.2	667	160	179	570	4.9	30426	OOR >	105	1.9	53	913	1662	25271	23249	45	192	679	497	72	26	74	143	68	87	93	179	75	116	30330	26740	3649
913	91366	0	4		0	1	0	1	1	2015-05-06	1	Mali 91366	3161	0.11	95	1.1	26128	26.7	1166	98	649	25933	OOR >	29905	OOR >	214	3.2	66	256	935	3340	1385	63	336	220	151	70	35	102	208	84	187	750	207	42	366	30213	25887	2943
913	91367	1	4		0	1	0	1	2	2015-05-06	1	Mali 91367	21557	0.4	123	1.4	25126	24	378	703	774	26119	OOR >	27366	OOR >	3722	28	72	1197	556	790	647	108	318	268	259	71	24948	2203	463	66	190	231	201	33	29	15341	17808	747
913	91368	0	5		0	1	0	1	2	2015-05-06	1	Mali 91368	26492	0.64	79	0.9	25733	25.5	1005	368	359	25087	85.5	22182	52.2	143	2.4	69	413	2041	27645	24006	62	446	662	521	102	25	102	230	86	95	1437	280	39	204	26470	25676	3998
913	91369	0	5		0	1	0	1	2	2015-05-06	1	Mali 91369	7014	0.17	72	0.8	25294	24.4	188	150	187	24578	77	29807	OOR >	20186	98.3	64	695	321	4079	1113	47	659	147	108	108	1022	156	198	345	220	802	132	25	43	27722	24439	1019
915	91550	0	1		0	1	0	1	2	2015-05-06	1	Mali 91550	26418	0.64	75	0.8	-208	OOR <	11	54	129	1994	12	53	0.4	3164	24.8	14	139	517	3202	3396	20	66	64	62	30	28	27	148	207	214	37	128	19	6	29545	14626	2489
915	91551	0	2		0	1	1	1	3	2015-05-06	1	Mali 91551	61	0.004	28	OOR <	-276	OOR <	10480	428	612	4707	22	6705	20.6	4783	33.7	17	462	1620	9215	6882	66	75	32	15	19	40	39	313	89	185	69	10	23	4	29509	2830	800
915	91552	1	2	7	0	1	1	1	3	2015-05-06	1	Mali 91552	23461	0.47	80	0.9	24797	23.3	78	270	429	9704	36.5	656	3.4	15401	80.4	113	92	614	1773	562	39	147	97	68	41	27	107	129	54	118	82	88	26	9	29616	4514	23968
915	91553	0	3	9	0	1	1	1	3	2015-05-06	1	Mali 91553	27065	0.74	87	1	15053	11.7	63	1461	1792	2289	13.3	63	0.5	4190	30.5	119	8528	1837	6819	2175	71	10	92	86	297	57	177	203	181	526	143	94	179	329	29757	18212	6193
915	91554	0	3	9	0	1	1	1	3	2015-05-06	1	Mali 91554	66	0.004	34	OOR <	-433	OOR <	330	120	154	106	1.1	3224	11.7	128	2.2	41	124	249	8853	2557	66	185	31	19	17	13	35	158	31	201	75	21	21	622	29739	21991	18961
915	91555	1	3	11	0	1	1	1	3	2015-05-06	1	Mali 91555	25169	0.56	102	1.2	26044	26.4	72	380	627	107	1.1	63	0.5	52	1	107	345	611	5117	3798	73	427	188	127	75	46	93	321	155	297	127	185	43	3838	30405	25690	2654
915	91556	1	4	8	0	1	1	1	3	2015-05-06	1	Mali 91556	29521	1.71	238	2.6	26875	29.6	464	25948	26483	193	2	3311	12	81	1.5	81	453	606	16035	5512	112	375	386	260	80	46	107	155	71	521	105	591	107	63	150	20261	263
915	91557	1	5	10	0	1	1	1	3	2015-05-06	1	Mali 91557	27679	0.82	86	1	22	OOR <	87	225	120	28022	OOR >	1426	6.3	27480	*123.6	63	94	554	17846	3087	95	158	492	231	47	2603	107	404	87	463	97	405	599	43	25517	570	3655
915	91558	1	5	10	0	1	0	0	2	2015-05-06	1	Mali 91558	25822	0.6	53	0.5	103	OOR <	31	818	1262	1482	9.7	79	0.6	1060	10.9	40	778	11334	4352	2712	58	240	92	76	42	31	65	164	112	648	81	132	142	244	3025	283	17120
915	91559	1	5	12	0	1	1	0	3	2015-05-06	1	Mali 91559	24082	0.48	203	2.3	29091	OOR >	194	342	466	262	2.6	249	1.6	131	2.2	530	1989	3271	4864	2176	396	843	388	338	192	395	727	424	498	742	395	433	193	235	30044	24417	7421
915	91560	0	3	7	0	1	1	1	3	2015-05-06	1	Mali 91560	5453	0.15	100	1.1	27595	34.4	52	40	2393	3700	18.6	647	3.4	3807	28.4	102	337	1463	25793	25150	81	339	439	217	79	38	101	169	80	359	195	397	31	28	30063	23332	3590
915	91561	0	3		0	1	0	1	2	2015-05-06	1	Mali 91561	24004	0.48	52	0.4	170	OOR <	69	268	313	50	*0.2	33	0.2	12	0.1	20	96	681	16546	17971	25	304	233	155	35	25	45	76	37	481	66	383	17	21	29358	14596	410
915	91562	0	4	8	0	1	0	1	2	2015-05-06	1	Mali 91562	3371	0.11	78	0.8	483	*0.2	4719	462	429	50	*0.2	59	0.5	49	1	82	513	3405	24545	23800	111	310	306	83	64	69	145	242	119	891	131	79	32	45	21626	24328	24727
915	91563	1	4	12	0	1	1	1	2	2015-05-06	1	Mali 91563	28846	1.29	83	0.9	25487	24.9	266	344	507	297	2.9	375	2.2	52	1	84	461	5957	4349	2611	74	436	474	424	68	144	113	172	97	360	136	1355	49	51	12785	19641	513
915	91564	1	4	12	0	1	0	0	2	2015-05-06	1	Mali 91564	29239	1.56	500	4.7	219	*0.0	319	533	1005	1188	8.3	169	1.2	1200	12	43	4031	7388	23465	7271	51	491	121	79	47	40	80	201	102	757	82	83	61	38	29115	9086	9947
915	91565	1	3	8	0	1	1	1	3	2015-05-06	1	Mali 91565	27177	0.71	56	0.5	25277	24.4	64	1820	2122	4206	20.4	176	1.2	4665	33.1	87	4983	1541	7583	10737	69	265	213	116	54	83	113	150	85	499	108	145	45	45	30463	25843	23563
915	91566	1	4		0	1	1	1	3	2015-05-06	1	Mali 91566	28489	1.11	68	0.7	64	OOR <	54	699	1066	10062	37.5	219	1.4	12684	69.6	39	306	1410	1592	2101	78	195	99	108	40	57	85	138	147	734	72	130	83	41	12436	5532	5604
917	91750	0	1		0	1	0	1	2	2015-05-06	1	Mali 91750	27086	0.73	229	2.5	27905	38.1	30173	367	499	761	6	480	2.7	287	4.1	712	12815	9079	19061	5795	608	948	655	612	202	186	770	255	320	509	578	729	376	311	2905	25331	910
917	91751	0	1		0	1	0	0	2	2015-05-06	1	Mali 91751	45	0.004	134	1.6	25265	24.4	30063	814	1226	24606	77.3	28384	OOR >	813	9	50	630	1420	21168	14830	58	749	235	167	82	44	90	134	63	308	124	162	63	41	28937	25391	3603
917	91752	0	2		0	1	0	1	2	2015-05-06	1	Mali 91752	1855	0.07	50	0.4	136	OOR <	47	305	363	7349	30.1	2108	8.5	6054	40.1	33	86	1066	2279	1137	37	191	109	118	58	35	48	184	76	984	97	115	19	26	806	152	303
917	91753	1	2	9	0	1	0	1	2	2015-05-06	1	Mali 91753	223	0.012	499	4.7	12838	9.8	4142	2397	932	28791	OOR >	30698	OOR >	28400	*126.7	265	2135	2665	14451	6578	624	748	286	309	188	212	341	4118	4203	592	1465	199	199	223	5841	379	3559
917	91754	1	3		0	1	1	1	3	2015-05-06	1	Mali 91754	8068	0.18	485	4.6	11909	9	166	314	488	29032	OOR >	28181	OOR >	29427	*130.1	77	148	1106	3289	2273	98	195	248	200	82	53	116	452	104	429	757	227	68	213	9262	1019	3025
917	91755	1	3		0	1	0	1	2	2015-05-06	1	Mali 91755	1726	0.06	105	1.2	27193	31.4	467	412	763	6451	27.5	26721	OOR >	1991	17.5	227	387	18631	25190	9193	148	686	369	242	184	85	214	385	186	498	240	656	84	191	29614	25515	4362
917	91756	0	3	9	0	1	0	1	2	2015-05-06	1	Mali 91756	5606	0.15	110	1.3	24404	22.5	177	1009	1111	8958	34.5	25369	62	253	3.7	86	130	366	9084	4953	77	574	295	247	157	470	114	273	103	269	162	314	39	39	29855	15905	7477
917	91757	1	3		0	1	1	1	3	2015-05-06	1	Mali 91757	27434	0.78	57	0.5	107	OOR <	66	832	1335	2218	13	116	0.8	2250	19.2	38	1448	576	3756	6805	76	216	136	91	84	56	90	405	111	872	85	102	105	41	23959	2277	335
917	91758	1	3		0	1	0	1	2	2015-05-06	1	Mali 91758	475	0.02	376	3.8	24294	22.3	120	2150	2480	26765	OOR >	1986	8.1	24388	*113.1	218	1002	6320	2975	3129	259	545	171	158	185	89	285	639	295	735	515	211	157	325	4168	2992	6917
917	91759	1	4		0	1	1	1	3	2015-05-06	1	Mali 91759	826	0.03	176	2	28338	52	465	362	335	25034	83.9	29651	OOR >	98	1.8	308	1669	3389	4358	1078	159	750	400	345	149	110	393	395	199	610	318	500	133	95	26903	5091	5421
917	91760	0	4	10	0	1	1	1	3	2015-05-06	1	Mali 91760	1298	0.05	226	2.5	26674	28.7	411	1176	1750	29875	OOR >	24793	59.3	29418	*130.0	115	160	664	1594	841	78	693	281	168	175	56	137	535	127	349	537	316	36	43	12005	13533	18079
917	91761	1	5	13	0	1	1	1	3	2015-05-06	1	Mali 91761	3724	0.12	305	3.2	27130	31	655	273	547	26050	OOR >	29440	OOR >	18954	93.8	291	367	3877	4809	1182	159	676	552	356	164	99	366	883	154	297	340	561	178	90	28382	5915	3561
917	91762	0	5		0	1	1	1	3	2015-05-06	1	Mali 91762	14297	0.25	75	0.8	27254	31.7	60	77	198	24808	79.6	372	2.2	24948	*115.0	133	218	855	2697	4897	73	735	239	180	78	101	160	137	113	348	970	234	67	52	29476	24667	3277
917	91763	0	5	12	0	1	1	1	3	2015-05-06	1	Mali 91763	484	0.02	603	5.4	24466	22.7	169	52	90	557	4.8	24298	57.6	70	1.3	54	400	424	9338	8097	156	424	212	147	81	109	141	285	185	249	97	185	125	38	30110	7358	2455
917	91764	1	6	14	0	1	0	1	1	2015-05-06	1	Mali 91764	28216	0.97	116	1.3	28465	79.7	219	426	681	10932	39.7	28535	OOR >	1086	11.2	149	1436	1893	2606	1758	136	618	2492	2337	129	77	188	245	134	201	796	976	110	205	29474	20242	2494
917	91765	0	6	10	0	1	1	1	3	2015-05-06	1	Mali 91765	242	0.01	120	1.4	24765	23.3	103	182	1208	17259	54.6	28787	OOR >	1758	16	128	1991	791	2834	1267	182	536	152	96	89	41	123	364	223	10070	206	161	58	67	30318	23301	19495
917	91766	1	1		0	1	1	1	3	2015-05-06	1	Mali 91766	5798	0.15	44	0.3	243	*0.0	172	496	813	1046	7.6	1484	6.5	753	8.5	48	140	523	3214	2048	72	249	33	21	24	26	47	368	54	352	118	28	15	17	2015	398	207
917	91767	0	1		0	1	1	1	3	2015-05-06	1	Mali 91767	1195	0.04	45	0.3	25307	24.5	584	356	471	20310	61.6	6194	19.4	109	1.9	53	95	568	4697	2792	54	242	239	171	58	34	99	256	102	482	122	187	55	28	12394	7673	363
917	91768	0	5	12	0	1	1	1	3	2015-05-06	1	Mali 91768	24587	0.51	82	0.9	24853	23.4	57	124	218	6210	26.8	16001	40.1	324	4.5	42	214	629	210	169	46	306	75	120	68	28	52	865	64	228	332	107	31	36	66	23126	68
917	91769	0	2		0	1	0	1	2	2015-05-06	1	Mali 91769	26191	0.62	195	2.2	27850	37.3	25954	270	247	6963	29	8927	25.6	7217	45.8	498	489	531	6680	3365	189	918	1222	1097	182	173	722	301	249	511	516	2550	98	224	29003	18919	1784
920	82150	1	5	11	0	1	0	1	2	2015-05-06	1	Mali 92050	6500	0.16	125	1.5	28562	OOR >	106	990	1566	1185	8.3	17913	43.7	2047	17.9	211	19359	18818	27065	14912	124	540	514	304	132	75	227	1405	157	425	561	300	948	82	29718	21073	2605
920	82151	0	5	11	0	1	0	1	2	2015-05-06	1	Mali 92051	5856	0.15	73	0.8	26586	28.4	4667	2279	3302	3544	18.1	141	1	3820	28.5	158	558	2109	20524	11911	225	470	372	261	96	148	246	361	311	367	204	357	97	249	29981	23056	2052
920	82152	1	6	14	0	1	1	1	3	2015-05-06	1	Mali 92052	3254	0.11	57	0.5	26872	29.6	356	276	349	240	2.5	98	0.7	178	2.8	104	628	2973	10640	4406	72	365	248	161	92	45	100	131	70	186	130	250	79	83	25636	23063	295
920	82153	1	6	14	0	1	1	1	3	2015-05-18	1	Mali 92053	26775	0.68	114	1.33	26778	29.18	488	631	5690	30106	OOR >	30512	OOR >	30004	*131.95	129	29745	18226	19635	6930	74	11932	684	603	88	84	261	128	486	229	676	909	109	45	30018	26267	17411
920	82154	0	6	12	0	1	1	1	3	2015-05-18	1	Mali 92054	26051	0.61	46	0.3	26666	28.69	701	196	103	186	1.97	93	0.69	135	2.27	72	455	1408	25144	19895	54	246	396	319	39	27539	13024	154	60	119	96	645	23	54	30213	25728	8498
920	82155	1	2		0	1	1	1	3	2015-05-18	1	Mali 92055	27097	0.73	446	4.32	-814	OOR <	1253	931	955	30491	OOR >	30033	OOR >	30168	*132.49	57	24206	24528	28751	27127	62	1806	413	189	83	314	127	280	120	298	470	282	149	61	29157	23380	7271
920	82156	0	5	10	0	1	1	1	3	2015-05-18	1	Mali 92056	5115	0.14	166	1.9	23767	21.42	177	646	543	29859	OOR >	27555	OOR >	769	8.61	73	3434	4320	7139	4296	52	5024	171	126	64	92	164	884	76	223	156	210	38	44	29289	23854	1938
920	82157	0	5	10	0	1	0	1	2	2015-05-18	1	Mali 92057	2153	0.07	113	1.32	26508	28.05	2467	701	609	23826	72.22	25819	65.17	1599	14.88	178	698	23838	3465	2852	91	728	501	278	267	223	306	179	164	171	367	448	89	46	29691	20691	24432
920	82158	0	2		0	1	0	0	2	2015-05-18	1	Mali 92058	26436	0.66	93	1.06	20831	17.42	111	6511	9961	26993	OOR >	1871	7.72	26546	*120.48	57	2695	14270	15521	9972	172	1344	154	94	56	121	154	593	189	201	123	156	38	31	30216	25130	17175
920	82159	1	2		0	1	1	1	3	2015-05-18	1	Mali 92059	23764	0.48	36	OOR <	-1212	OOR <	24	72	127	1595	10.27	5166	16.85	319	4.42	102	219	6085	6298	1302	148	-82	1179	1025	52	56	99	403	69	202	181	875	49	58	23473	539	279
920	82160	0	2		0	1	1	1	3	2015-05-18	1	Mali 92060	30513	>2.39	26	OOR <	25970	26.22	24513	50	68	13139	45.11	103	0.76	11933	66.5	78	256	1998	24233	13994	41	42	319	244	26	83	79	64	45	96	75	370	19	24	28632	24159	1934
920	82161	1	3	8	0	1	0	1	2	2015-05-07	1	Mali 92061	14932	0.26	162	1.9	24004	21.8	339	2099	664	12026	42.4	28372	OOR >	439	5.6	40	4827	18739	4009	1821	63	1421	198	147	179	61	203	407	150	522	476	239	104	79	17899	387	2292
920	82162	1	3	3	0	1	1	1	3	2015-05-07	1	Mali 92062	167	0.007	159	1.8	4902	3.4	157	154	1249	474	4.2	30056	OOR >	372	5	47	814	8548	22863	4689	80	132	184	107	42	38	78	268	78	567	175	97	137	37	31282	23995	5078
920	82163	0	3		0	1	0	1	2	2015-05-07	1	Mali 92063	31494	>2.39	506	4.8	25734	25.5	2808	6689	3285	31458	OOR >	29274	OOR >	30387	*133.2	86	2844	25451	7974	4352	93	935	400	300	105	81	256	225	233	504	219	342	78	55	207	104	241
920	82164	1	3	11	0	1	0	0	2	2015-05-07	1	Mali 92064	28668	1.15	91	1	26122	26.7	153	436	234	83	0.8	54	0.4	32	0.7	78	543	2217	10612	2897	63	140	213	102	57	51	146	125	50	114	112	218	27	50	27188	1236	3113
920	82165	0	4	10	0	1	1	1	3	2015-05-07	1	Mali 92065	31160	>2.39	53	0.5	24891	23.5	33	400	443	120	1.3	74	0.6	21	0.4	46	308	858	9737	5058	54	134	161	67	34	64	99	159	55	326	149	72	56	23	10974	26562	847
920	82166	0	4	13	0	1	1	1	3	2015-05-07	1	Mali 92066	26307	0.65	69	0.7	27180	31.3	47	555	1115	17088	54.2	15249	38.6	15404	80.4	52	3535	1692	6109	3719	67	193	441	294	175	55	183	325	102	1092	201	503	33	35	30917	28543	8203
920	82167	1	4	14	0	1	0	1	2	2015-05-07	1	Mali 92067	29609	1.76	122	1.4	-1340	OOR <	44	1523	1910	31766	OOR >	5499	17.7	31404	*136.5	66	3983	1853	30056	26691	58	1001	358	215	89	63	196	221	142	462	135	299	10	18	31215	27361	1178
920	82168	0	5	10	0	1	1	1	3	2015-05-07	1	Mali 92068	646	0.03	41	0.2	26721	28.9	75	145	355	2223	13	2249	8.9	93	1.7	17	701	5295	8727	7616	79	115	175	93	55	62	94	535	113	151	192	152	3383	39	30281	1545	14312
920	82169	1	5	12	0	1	0	1	2	2015-05-07	1	Mali 92069	19401	0.35	81	0.9	26832	29.4	536	337	417	5119	23.4	29775	OOR >	4803	33.8	186	1306	1573	11079	5084	114	294	673	601	121	97	373	253	209	275	214	387	69	67	29568	27191	1086
926	92650	0	3	10	0	1	0	1	2	2015-05-07	1	Mali 92650	4031	0.13	108	1.3	25867	25.9	1121	888	1126	28858	OOR >	30042	OOR >	402	5.3	75	1038	2517	6455	1592	69	522	261	170	168	101	337	540	118	683	338	510	6814	806	24646	4904	6240
926	92651	1	6	13	0	1	1	1	3	2015-05-07	1	Mali 92651	30550	>2.39	95	1.1	19442	15.9	225	1663	203	115	1.2	6774	20.7	73	1.4	18	343	3798	7310	5434	50	-81	97	75	78	39	65	364	79	456	152	113	17	409	93	7208	71
926	92652	0	1	7	0	1	1	1	3	2015-05-07	1	Mali 92652	28127	0.92	79	0.9	-1675	OOR <	4384	130	174	52	0.3	17909	43.7	56	1.1	10	122	868	13919	2510	81	-81	219	203	43	58	57	233	128	300	86	454	15	17	29942	24824	1687
926	92653	0	5	11	0	1	1	1	3	2015-05-07	1	Mali 92653	1077	0.04	174	2	24135	22.1	119	462	599	27702	OOR >	29645	OOR >	1626	15.1	115	6231	4837	3800	2516	185	1319	160	126	93	72	256	536	126	565	334	222	31	84	29292	13469	610
926	92654	0	1	6	0	1	1	1	3	2015-05-07	1	Mali 92654	1071	0.04	91	1	24844	23.4	1139	151	364	279	2.8	348	2.1	53	1	30	536	8153	28442	23376	46	668	285	109	80	24	80	1246	790	405	441	223	124	319	29411	14139	4693
926	92655	0	6	14	0	1	1	1	3	2015-05-07	1	Mali 92655	25059	0.53	217	2.4	23350	20.7	313	188	392	3239	17	9951	27.8	82	1.5	50	905	823	1770	1308	307	897	3227	2790	113	46	83	380	145	2618	285	1592	19	39	25837	5150	744
926	92656	0	2	8	0	1	1	1	3	2015-05-07	1	Mali 92656	4258	0.13	71	0.7	-309	OOR <	249	2184	3428	28365	OOR >	30867	OOR >	4419	31.8	35	1030	1142	21219	13114	85	1121	1383	1071	87	57	386	345	109	1006	362	584	58	315	31183	26979	23962
926	92657	1	5	12	0	1	1	1	3	2015-05-07	1	Mali 92657	19489	0.34	226	2.5	26259	27.1	2617	431	854	29047	OOR >	29755	OOR >	546	6.6	199	10028	6795	18771	4801	99	1812	536	355	126	134	470	1087	154	1595	563	417	74	73	24347	2515	21142
926	92658	1	6	14	0	1	1	1	3	2015-05-07	1	Mali 92658	30741	>2.39	139	1.6	13086	10	2628	719	2585	30025	OOR >	31014	OOR >	29863	*131.5	76	23965	27392	11881	4412	103	286	225	129	102	62	227	1193	207	751	436	184	2366	4013	29804	21171	24515
926	92659	0	3	10	0	1	1	1	3	2015-05-07	1	Mali 92659	28255	0.97	1442	10.4	24198	22.2	282	703	1169	1536	10	15257	38.6	302	4.2	57	3349	7413	14178	7155	47	339	202	104	93	43	113	219	75	538	114	150	14	24	62	22281	252
926	92660	1	3	10	0	1	1	1	3	2015-05-07	1	Mali 92660	134	0.006	83	0.9	24916	23.6	717	1154	4594	23855	72.4	30188	OOR >	8230	50.4	121	27047	6441	28663	25205	114	1635	497	272	92	67	292	672	138	504	272	426	45	43	29981	19512	8835
926	92661	1	1	6	0	1	0	1	2	2015-05-07	1	Mali 92661	3094	0.11	46	0.3	24138	22.1	549	102	189	94	1	75	0.6	44	0.9	50	87	1226	860	856	27	203	102	67	31	37	98	120	95	411	75	101	276	717	30841	26412	5885
926	92662	0	5	10	0	1	1	1	3	2015-05-07	1	Mali 92662	27637	0.84	96	1.1	25850	25.9	71	100	218	1123	8	28814	OOR >	2043	17.9	52	327	3535	876	625	49	378	2117	2067	62	48	118	202	69	588	115	2183	16	48	30592	24145	3574
926	92663	0	5	11	0	1	1	1	3	2015-05-07	1	Mali 92663	2286	0.083	60	0.6	20803	17.4	556	195	269	4606	21.7	30428	OOR >	2648	21.7	43	505	11355	20672	4218	49	112	177	76	54	130	104	519	59	250	219	105	18	74	29368	24064	24414
926	92664	1	5	10	0	1	1	1	3	2015-05-07	1	Mali 92664	190	0.006	37	0.1	23175	20.5	2578	267	1128	4325	20.8	5232	17	174	2.8	32	336	1148	2041	1561	104	198	146	128	375	62	83	354	155	422	129	85	37	434	10521	1703	831
926	92665	0	6	15	0	1	1	1	3	2015-05-07	1	Mali 92665	2578	0.093	180	2	21778	18.6	244	630	505	7583	30.8	30392	OOR >	7079	45.1	93	1034	763	4540	2527	87	481	167	137	106	117	309	1349	246	860	1974	152	73	504	13056	7616	695
926	92666	0	6	15	0	1	1	1	3	2015-05-07	1	Mali 92666	21580	0.4	119	1.4	20909	17.5	743	207	290	24298	74.9	28068	OOR >	14988	78.8	60	6095	4469	3548	3713	190	910	364	291	61	122	149	685	384	392	539	195	24	40	29543	18864	9396
926	92667	1	5	11	0	1	1	1	3	2015-05-07	1	Mali 92667	29850	1.94	249	2.7	24045	21.9	489	497	1042	24101	73.6	25201	61.1	24262	*112.7	166	11892	3577	23284	8984	218	376	330	178	114	68	2048	931	231	715	619	255	81	108	24520	25739	15329
926	92668	1	6	13	0	1	1	1	3	2015-05-07	1	Mali 92668	29686	1.83	64	0.6	22370	19.3	231	584	1213	6857	28.7	26748	OOR >	1223	12.2	41	178	24106	1262	1106	104	211	2329	2012	39	76	90	368	228	769	114	447	28	27	26008	3995	228
926	92669	1	2	7	0	1	1	1	3	2015-05-07	1	Mali 92669	28848	1.94	79	0.9	22535	19.6	276	278	299	26816	OOR >	29569	OOR >	5853	39.2	65	864	3094	4967	1609	329	270	214	119	470	197	226	1649	552	431	851	184	52	48	28551	24385	6474
931	93150	0	6	11	0	1	1	1	3	2015-05-07	1	Mali 93150	24500	0.52	28	OOR <	20061	16.6	61	214	331	26649	OOR >	30063	OOR >	197	3	46	857	538	4834	1601	23	20	197	157	54	34	125	179	43	109	106	203	22	71	22948	5608	339
931	93151	1	5		0	1	1	1	3	2015-05-07	1	Mali 93151	23694	0.47	779	6.6	25036	23.8	4931	367	369	24865	80.4	29547	OOR >	1524	14.4	255	413	927	10354	1900	122	152	316	242	90	128	527	243	1817	490	424	321	68	491	28229	13071	9626
931	93152	1	3	10	0	1	0	1	2	2015-05-07	1	Mali 93152	106	0.005	94	1.1	11493	8.7	1453	488	379	25958	OOR >	12843	33.9	7822	48.6	72	1971	1646	3468	2809	258	191	97	76	80	40	436	1020	119	375	532	129	27	141	13749	13442	1261
931	93153	0	3		0	1	1	1	3	2015-05-07	1	Mali 93153	360	0.02	48	0.3	24525	22.8	476	555	414	26054	OOR >	29896	OOR >	66	1.3	96	12822	24259	5639	4858	70	21	594	363	49	54	166	175	81	260	494	242	51	84	29783	12644	28301
931	93154	0	1	6	0	1	1	1	3	2015-05-07	1	Mali 93154	562	0.03	20	OOR <	24352	22.4	165	209	247	842	6.5	23631	55.6	93	1.7	15	447	7751	3357	632	162	-173	156	123	48	37	59	69	32	136	47	178	65	960	28612	22709	1168
931	93155	0	3		0	1	1	1	3	2015-05-07	1	Mali 93155	24200	0.49	106	1.2	23352	20.8	2286	159	325	2468	14	29863	OOR >	117	2	174	371	2384	3278	1670	97	342	211	128	68	66	300	163	135	405	188	169	40	46	24574	1089	693
931	93156	1	3		0	1	0	1	2	2015-05-07	1	Mali 93156	29198	1.42	187	2.1	23196	20.5	473	121	868	25515	OOR >	27933	OOR >	19923	97.3	111	361	8124	18112	12106	102	955	224	200	116	54	224	1400	139	577	401	260	35	100	29729	27277	9765
931	93157	1	4		0	1	1	1	3	2015-05-07	1	Mali 93157	27287	0.74	82	0.9	20975	17.6	440	675	1476	29473	OOR >	27721	OOR >	26837	*121.5	114	18666	23835	26390	12379	96	-191	296	159	67	93	188	350	161	290	836	277	832	368	140	24991	110
931	93158	0	6	15	0	1	0	0	2	2015-05-07	1	Mali 93158	4139	0.13	49	0.4	20360	16.9	28912	274	348	29244	OOR >	30268	OOR >	1879	16.8	65	646	875	5379	1615	46	4923	176	98	70	40	118	199	138	322	106	182	27	33	823	423	24569
931	93159	1	5	12	0	1	1	1	3	2015-05-07	1	Mali 93159	573	0.03	141	1.6	26963	30.1	190	507	472	26621	OOR >	29739	OOR >	13029	71	333	2501	10337	12172	4466	181	561	650	596	182	338	967	373	215	528	414	646	121	212	233	26606	675
931	93160	1	1		0	1	1	1	3	2015-05-07	1	Mali 93160	842	0.03	11	OOR <	-1820	OOR <	102	765	675	40	OOR <	881	4.3	18	0.3	-2	232	187	7050	3290	22	75	43	27	10	13	28	31	17	81	32	35	12	14	28985	360	2571
931	93161	0	3		0	1	1	1	3	2015-05-07	1	Mali 93161	28116	0.94	171	2	22879	20	747	148	6591	4761	22.2	30242	OOR >	199	3.1	71	404	973	8891	2730	170	4060	3740	3546	68	93	153	332	216	908	220	2337	61	48	24838	18559	3692
931	93162	1	5	14	0	1	1	1	3	2015-05-07	1	Mali 93162	18680	0.32	65	0.7	22786	19.9	2825	1508	1984	30613	OOR >	28275	OOR >	30111	*132.3	54	845	2399	2889	1535	85	777	195	120	66	37	84	273	91	207	871	154	42	110	29103	14444	731
931	93163	0	5	15	0	1	1	1	3	2015-05-07	1	Mali 93163	1519	0.05	17	OOR <	16147	12.7	47	29	124	5111	23.3	24934	59.9	117	2	37	147	611	2206	267	71	-263	52	25	23	17	30	78	37	201	40	37	349	25	1855	138	314
931	93164	1	4		0	1	1	1	3	2015-05-07	2	Mali 93164	7048	0.17	298	3.1	5384	3.8	30321	529	378	29304	OOR >	28688	OOR >	25357	*116.4	151	534	4239	5779	5022	151	415	308	286	114	1093	205	309	149	461	202	222	140	1715	29944	23778	15072
931	93165	1	4	9	0	1	1	1	3	2015-05-07	2	Mali 93165	29189	1.42	267	2.9	9699	7.2	546	966	1171	24146	73.9	28229	OOR >	8344	51	184	282	2233	5765	3358	204	8706	309	237	118	76	277	300	194	243	176	259	83	284	30558	21778	5391
931	93166	0	4		0	1	1	1	3	2015-05-07	2	Mali 93166	550	0.02	63	0.6	25403	24.7	10693	89	113	23570	71.1	11054	30.2	72	1.4	25	62	747	1304	392	35	376	124	69	97	23	65	73	70	157	73	99	22	23	28343	10367	1021
931	93167	1	6	12	0	1	0	1	2	2015-05-07	2	Mali 93167	6828	0.17	80	0.9	23754	21.4	292	104	363	14302	47.9	14444	37	584	7	68	2157	2792	1173	1237	68	1430	272	210	80	65	119	188	134	146	112	252	44	35	27496	21537	4368
931	93168	0	4		0	1	1	1	3	2015-05-07	2	Mali 93168	4354	0.13	218	2.4	26774	29.2	184	254	303	23596	71.2	29133	OOR >	7226	45.8	95	2147	6532	15246	10863	104	7163	306	175	106	65	219	1012	186	257	522	201	97	133	4171	25515	708
931	93169	1	1		0	1	1	1	3	2015-05-07	2	Mali 93169	15939	0.28	51	0.4	22	OOR <	1924	420	598	30488	OOR >	30430	OOR >	889	9.6	23	189	2321	15512	2886	243	551	219	109	79	168	130	299	330	164	58	137	22	31	30797	27862	332
933	93350	1	3	9	0	1	1	1	2	2015-05-07	2	Mali 93350	24586	0.52	83	0.9	27958	38.9	931	849	526	26379	OOR >	29760	OOR >	428	5.5	112	785	2872	23711	8236	100	2659	440	269	87	152	222	213	129	626	169	351	55	55	27912	4419	27258
933	93351	1	1		0	1	0	1	2	2015-05-07	2	Mali 93351	28392	1.09	125	1.5	22421	19.4	1406	1261	1755	30128	OOR >	30922	OOR >	29876	*131.5	60	787	12525	25613	21716	140	1108	483	285	226	67	142	176	649	461	978	334	57	38	31288	7334	2140
933	93352	1	4		0	1	0	0	1	2015-05-07	2	Mali 93352	27243	0.76	617	5.5	28783	OOR >	9609	1537	1136	30721	OOR >	30263	OOR >	29521	*130.4	332	823	9223	4628	2847	399	2558	1392	1295	210	164	922	1143	307	838	768	1514	129	120	8721	7135	3469
933	93353	0	5	10	0	1	0	0	1	2015-05-07	2	Mali 93353	22202	0.42	206	2.3	28049	40.7	4290	925	1027	29027	OOR >	27370	OOR >	23854	*111.3	397	1716	2043	3238	2072	204	1167	543	437	901	213	742	321	300	609	387	515	385	2785	31126	25366	8279
933	93354	0	1		0	1	0	1	1	2015-05-07	2	Mali 93354	18664	0.32	135	1.6	-282	OOR <	4038	3385	5645	1027	7.5	30441	OOR >	728	8.3	60	219	1004	25433	14226	167	570	512	368	77	239	299	652	214	816	324	690	32	83	30902	27265	6413
933	93355	1	4		0	1	0	0	1	2015-05-07	2	Mali 93355	8379	0.18	79	0.9	28084	41.5	301	555	335	27722	OOR >	25899	66	24464	*113.4	87	548	2806	6432	2713	60	659	179	124	95	59	160	248	188	340	319	189	46	33	30811	27878	5860
933	93356	1	6		0	1	0	0	2	2015-05-07	2	Mali 93356	26319	0.65	147	1.7	27446	33.1	796	440	611	29725	OOR >	30255	OOR >	28189	*126.0	102	706	1542	3041	981	94	697	279	111	74	70	145	343	159	554	193	167	52	82	240	7645	167
933	93357	1	6	12	0	1	1	1	3	2015-05-07	2	Mali 93357	29890	2	380	3.8	-488	OOR <	155	573	780	20850	62.9	30451	OOR >	23843	*111.2	191	1657	3348	12580	5746	294	365	222	150	194	113	242	1054	405	716	457	268	159	112	29669	21667	964
933	93358	0	1		0	1	0	0	1	2015-05-07	2	Mali 93358	6754	0.16	1020	8	28248	46.8	180	104	225	11807	41.9	27885	OOR >	365	4.9	61	678	19827	10447	3370	517	1142	178	96	122	175	595	4370	699	1906	523	103	51	64	30742	1746	28766
933	93359	1	1		0	1	0	0	1	2015-05-07	2	Mali 93359	263	0.01	55	0.5	48	OOR <	8707	626	1022	26954	OOR >	26987	OOR >	22826	*107.7	26	5819	5287	27899	24080	30	242	417	123	38	268	62	308	140	373	131	132	22	25	30845	26640	25382
933	93360	1	1		0	1	0	0	2	2015-05-07	2	Mali 93360	18947	0.34	77	0.8	27919	38.3	77	2482	2497	11778	41.8	27748	OOR >	476	6	81	388	4446	22844	6326	66	91	220	120	52	65	159	200	94	615	136	146	39	66	30329	25511	29794
933	93361	1	3		0	1	0	0	1	2015-05-07	2	Mali 93361	23976	0.49	717	6.2	-24	OOR <	285	291	7058	28983	OOR >	30161	OOR >	28374	*126.6	151	4724	25534	23849	11874	293	5518	421	433	171	967	3640	487	405	1671	630	307	61	54	27312	2084	3634
933	93362	0	2	7	0	1	0	0	1	2015-05-07	2	Mali 93362	21169	0.38	71	0.7	24945	23.6	29	290	318	10259	38	105	0.8	62	1.2	52	7255	2473	28472	25848	98	134	567	177	60	39	115	213	181	381	138	275	20	35	30827	26459	6356
933	93363	1	4	9	0	1	1	1	2	2015-05-18	1 rep	Mali 93363	30178	2.33	7551	34.34	25040	23.84	1554	2135	217	28187	OOR >	29421	OOR >	7301	46.15	107	1954	21299	25175	17873	91	563	258	159	106	103	309	871	173	392	536	336	721	780	24641	23859	27712
933	93364	1	5		0	1	0	0	1	2015-05-07	2	Mali 93364	795	0.04	165	1.9	28620	OOR >	108	172	348	2511	14.2	24232	57.4	1659	15.3	468	404	2521	4471	2173	192	1116	437	402	130	215	685	216	249	316	386	789	114	109	137	24693	138
933	93365	1	1		0	1	1	1	3	2015-05-07	2	Mali 93365	29415	1.66	206	2.3	27654	35	903	391	591	29362	OOR >	30107	OOR >	28552	*127.2	203	1797	660	1603	1436	282	800	555	481	127	208	941	1870	513	903	676	765	187	111	30688	24436	28640
933	93366	1	4		0	1	0	1	2	2015-05-07	2	Mali 93366	28850	1.17	312	3.3	28232	46.1	3429	467	1198	715	5.7	30520	OOR >	408	5.3	236	705	1137	20191	4477	102	551	331	245	135	105	377	342	191	339	334	267	50	59	30676	27414	29720
933	93367	1	6	16	0	1	0	0	2	2015-05-07	2	Mali 93367	29606	1.8	333	3.4	27226	31.6	359	4474	872	30988	OOR >	30354	OOR >	30586	*133.8	117	1830	11068	4443	1010	79	1036	297	198	89	125	185	598	279	422	1134	308	54	59	26615	2702	26028
933	93368	0	3		0	1	0	0	1	2015-05-07	2	Mali 93368	23524	0.48	150	1.7	25995	26.3	16217	248	559	28160	OOR >	27029	OOR >	148	2.4	79	708	12472	25335	22199	176	1040	480	295	86	134	237	302	259	501	181	358	35	78	24603	2888	14007
933	93369	0	1		0	1	0	0	2	2015-05-07	2	Mali 93369	7761	0.18	138	1.6	228	*0.0	24	576	651	2041	12.2	28001	OOR >	1689	15.5	119	2286	1532	25771	17131	140	298	856	1159	207	29	1683	216	171	359	201	521	18	20	30287	23970	16399
936	93650	0	4		0	1	0	0	2	2015-05-07	2	Mali 93650	30527	>2.39	60	0.6	-176	OOR <	3793	147	220	24425	75.8	693	3.6	534	6.5	51	5194	3485	20145	9634	41	310	284	194	132	31	61	182	87	412	76	427	51	18	29468	24288	12724
936	93651	0	5	10	0	1	0	1	2
936	93652	0	2		0	1	0	1	2	2015-05-07	2	Mali 93652	26838	0.69	68	0.7	-811	OOR <	2125	75	93	486	4.3	15523	39.2	104	1.8	25	1281	4194	948	1142	44	181	70	97	57	52	160	83	185	102	99	350	22	31	4521	248	2701
936	93653	1	2		0	1	0	1	2	2015-05-07	2	Mali 93653	29536	1.8	138	1.6	27807	36.7	597	24603	25217	7553	30.7	288	1.8	207	3.2	88	498	4269	23709	9936	331	586	412	283	117	269	288	343	371	161	212	352	279	72	30727	21712	21574
936	93654	0	4		0	1	0	1	2	2015-05-07	2	Mali 93654	210	0.009	89	1	-303	OOR <	359	259	282	30095	OOR >	30610	OOR >	217	3.3	51	818	577	3704	1267	294	572	275	223	96	202	206	609	915	192	257	194	54	226	115	114	85
936	93655	0	6		0	1	0	1	2	2015-05-07	2	Mali 93655	29890	1.97	113	1.3	25027	23.8	132	111	198	14755	48.9	26388	*81.6	1101	11.3	39	291	544	9653	3945	104	184	206	131	67	44	73	128	172	138	159	201	151	27	6223	21741	978
936	93656	0	5		0	1	0	1	2	2015-05-07	2	Mali 93656	24277	0.51	61	0.6	24072	21.9	183	221	260	2410	13.8	17114	42.2	54	1.1	51	333	6539	25219	24780	51	226	390	153	82	85	141	85	75	126	70	237	34	46	30545	24081	1929
936	93657	0	6	15	0	1	0	1	2	2015-05-07	2	Mali 93657	25670	0.58	142	1.6	27257	31.8	251	677	811	29865	OOR >	30373	OOR >	28887	*128.3	434	785	7168	4146	3378	264	846	404	305	165	384	1081	837	351	368	528	401	96	120	27135	22311	15238
936	93658	1	4		0	1	0	1	1	2015-05-07	2	Mali 93658	28294	1	6151	29.6	26673	28.7	201	778	837	10019	37.3	25593	63.4	4257	30.9	319	671	7052	1484	1037	157	473	592	606	164	198	566	695	235	224	601	522	101	104	29254	20682	2844
936	93659	0	2		0	1	0	1	2	2015-05-07	2	Mali 93659	14745	0.26	64	0.6	-535	OOR <	67	98	232	24874	80.6	4285	14.6	127	2.2	29	194	802	1307	528	96	134	101	90	51	75	80	140	270	120	166	119	37	152	25670	3340	191
936	93660	1	1	6	0	1	0	0	2	2015-05-07	2	Mali 93660	29233	1.42	132	1.5	25377	24.6	3089	10393	14511	25227	97.1	30233	OOR >	6593	42.8	167	381	11591	2282	4095	296	1355	449	381	113	168	328	1131	1216	546	293	948	89	54	29292	5666	25587
936	93661	0	2		0	1	1	1	3	2015-05-07	2	Mali 93661	13584	0.25	94	1.1	26890	29.7	322	24224	19284	24857	80.3	29339	OOR >	11914	66.4	139	1293	13297	24877	16158	280	710	280	176	56	131	241	806	633	256	267	197	3411	591	30298	21608	1031
936	93662	1	2		0	1	0	1	2	2015-05-07	2	Mali 93662	2211	0.08	72	0.8	-563	OOR <	205	517	1232	25551	OOR >	29873	OOR >	884	9.6	65	1675	3171	2222	1744	67	447	127	119	46	81	297	299	154	128	18860	74	37	57	25970	3458	22672
936	93663	0	2		0	1	1	1	3	2015-05-07	2	Mali 93663	26219	0.62	100	1.1	24949	23.6	492	6253	10398	19243	59.1	21491	50.7	9886	57.8	57	6198	11799	23733	1209	46	20651	385	160	42	31	131	63	74	100	150	264	28	31	27477	24562	1550
936	93664	1	3	9	0	1	0	1	2	2015-05-07	2	Mali 93664	28303	1.04	132	1.5	89	OOR <	5387	213	412	11085	40.1	28219	OOR >	223	3.4	33	24202	25995	22516	8488	43	242	246	188	38	34	102	157	115	312	131	786	304	172	23126	1400	4260
936	93665	0	3	9	0	1	0	1	2	2015-05-07	2	Mali 93665	28519	1.1	41	0.2	-189	OOR <	351	152	1184	24899	81	27093	OOR >	6357	41.6	36	668	1364	16237	7837	46	191	613	455	46	41	113	135	365	172	171	378	20	17	29841	16906	963
936	93666	1	5	13	0	1	0	1	2	2015-05-07	2	Mali 93666	401	0.02	201	2.3	24462	22.7	459	17919	713	30703	OOR >	30215	OOR >	30235	*132.7	218	28884	26738	24232	20674	231	1063	391	305	122	163	330	996	309	747	2412	298	90	69	137	21059	269
936	93667	0	3		0	1	0	1	2	2015-05-07	2	Mali 93667	29060	1.35	251	2.7	27915	38.2	455	666	770	27260	OOR >	29483	OOR >	1466	14	168	874	2101	3324	1308	126	762	283	175	200	206	258	191	294	401	261	234	49	83	29832	17312	444
936	93668	0	5		0	1	0	1	2	2015-05-08	1	Mali 93668	96	0.004	257	2.8	-512	OOR <	389	4905	257	31126	OOR >	6828	20.9	2330	19.7	151	1264	3114	2864	3578	279	211	99	61	79	119	1087	488	275	264	84	97	64	60	32249	9371	2291
936	93669	0	6	15	0	1	0	1	2	2015-05-08	1	Mali 93669	32344	>2.39	174	2	30672	OOR >	1872	149	695	9385	35.7	670	3.5	5758	38.7	321	1131	23776	13019	8243	160	2112	333	246	154	98	549	267	1230	289	375	311	76	479	31414	25789	11226
936	93670	0	5		0	1	0	0	2	2015-05-08	1	Mali 93670	392	0.02	234	2.6	29086	OOR >	554	6574	1062	31952	OOR >	31851	OOR >	3653	27.6	274	11376	2880	7088	6196	318	1198	3708	3680	529	95	373	2846	11564	572	3420	1570	78	93	32584	5171	5965
938	93850	0	4		0	1	0	0	2	2015-05-08	1	Mali 93850	32115	>2.39	113	1.3	30183	OOR >	446	480	764	11023	39.9	31598	OOR >	301	4.2	92	1183	2751	15325	4557	179	1187	824	588	63	85	155	542	272	338	209	458	23	36	14526	29286	19517
938	93851	1	6		0	1	0	1	2	2015-05-08	1	Mali 93851	24669	0.53	2405	15	28859	OOR >	687	489	199	30325	OOR >	31381	OOR >	26295	*119.6	51	297	1774	1957	884	54	227	2117	1647	124	30	275	204	294	276	104	651	21	19	22545	12752	658
938	93852	0	6		0	1	0	0	2	2015-05-08	1	Mali 93852	32201	>2.39	224	2.5	28056	40.8	525	388	710	32624	OOR >	31593	OOR >	32635	*140.5	161	379	2265	1187	1352	250	494	270	199	148	177	276	423	4382	766	892	344	730	634	31321	24531	5227
938	93853	1	6		0	1	0	1	2	2015-05-08	1	Mali 93853	27627	0.82	228	2.5	27972	39.2	163	335	570	32227	OOR >	32024	OOR >	31952	*138.3	173	490	3544	932	949	100	324	197	119	167	69	254	291	144	798	326	189	64	82	32183	9581	1117
938	93854	0	2		0	1	0	0	2	2015-05-08	1	Mali 93854	278	0.01	696	6.1	29793	OOR >	326	877	1161	27132	OOR >	32648	OOR >	217	3.3	128	3263	7682	27824	24256	155	327	342	248	561	98	192	686	331	908	503	236	39	41	32525	31668	31151
938	93855	0	6		0	1	0	1	2	2015-05-08	1	Mali 93855	30016	2.28	60	0.6	29765	OOR >	1168	300	307	697	5.6	31741	OOR >	474	6	155	4843	11639	4006	2103	68	324	2807	1612	95	61	191	171	112	486	208	402	32	35	32066	26068	1585
938	93856	0	5		0	1	0	1	2	2015-05-08	1	Mali 93856	25446	0.57	124	1.4	29668	OOR >	1312	1413	1749	1675	10.6	32340	OOR >	239	3.5	98	6118	3129	10857	3913	219	257	204	132	47	159	235	439	341	512	158	252	833	562	114	28045	155
938	93857	1	2		0	1	0	0	2	2015-05-18	1 rep	Mali 93857	423	0.02	80	0.88	24275	22.3	413	3319	3673	4089	19.97	29487	OOR >	4089	18.26	56	14436	23304	27377	25416	39	613	322	210	81	34	80	230	52	205	94	519	157	183	121	27688	455
938	93858	1	2		0	1	0	1	1	2015-05-08	1	Mali 93858	26138	0.64	90	1	28995	OOR >	627	1149	784	510	4.5	30244	OOR >	374	5	120	998	406	9554	4144	61	277	167	110	174	94	342	375	1007	517	665	137	29	33	32342	26977	5812
938	93859	1	4		0	1	0	0	1	2015-05-08	1	Mali 93859	7175	0.17	70	0.7	28509	OOR >	126	826	127	3849	19.1	32072	OOR >	6460	42.1	51	1014	28039	8806	3986	99	459	364	268	67	26	493	248	1233	621	127	623	26	58	31982	21760	28886
938	93860	1	4		0	1	0	1	1	2015-05-08	1	Mali 93860	292	0.01	231	2.5	28258	47.2	557	3298	860	397	3.7	31165	OOR >	444	5.7	86	365	4777	25729	17041	110	30695	300	266	86	47	1661	755	1040	469	412	346	279	337	32262	28526	30554
938	93861	1	4		0	1	0	1	2	2015-05-08	1	Mali 93861	16114	0.28	152	1.8	29211	OOR >	281	1001	980	4502	21.4	20131	48	196	3	169	1155	6127	13061	5087	154	409	259	187	127	27826	4584	457	499	623	941	260	449	6522	32314	21554	21624
938	93862	0	4		0	1	0	1	2	2015-05-08	1	Mali 93862	3725	0.12	89	1	29574	OOR >	4892	7072	271	30203	OOR >	27703	OOR >	2769	22.4	153	656	8880	17425	5018	72	964	215	147	144	53	228	293	130	407	414	246	88	177	31884	26931	1557
938	93863	0	4		0	1	0	0	2	2015-05-08	1	Mali 93863	330	0.02	114	1.3	16070	12.6	3398	659	353	28339	OOR >	31755	OOR >	3416	26.2	77	1911	1621	16278	8872	99	194	114	134	157	73	255	576	304	773	941	137	30	39	30777	23077	3866
938	93864	1	5		0	1	0	1	2	2015-05-08	1	Mali 93864	5008	0.14	368	3.7	26384	27.6	532	1023	1333	807	6.3	32006	OOR >	3323	25.7	845	13390	6618	16011	4780	284	2003	308	387	207	208	995	628	572	786	1772	436	121	133	30035	5921	17380
938	93865	1	2		0	1	0	1	1	2015-05-08	1	Mali 93865	30642	>2.39	125	1.5	16457	13	164	313	297	24067	73.4	31648	OOR >	30487	*133.5	85	870	14012	5976	2740	58	169	122	72	270	14239	828	651	110	422	487	79	24	35	31218	12730	9375
938	93866	0	5		0	1	0	0	2	2015-05-08	1	Mali 93866	31279	>2.39	53	0.5	26631	28.5	347	335	222	30521	OOR >	29187	OOR >	115	2	34	686	1130	7106	2419	64	39	126	72	43	23	185	139	144	307	98	115	9	11	30995	25985	29714
938	93867	0	5		0	1	0	0	2	2015-05-08	1	Mali 93867	14201	0.25	112	1.3	29041	OOR >	767	230	229	15822	51.4	31926	OOR >	23910	*111.5	57	1631	2834	6767	3930	93	152	1392	1307	69	66	520	359	90	289	239	1381	13	89	31980	24329	872
938	93868	0	6		0	1	0	1	2	2015-05-08	1	Mali 93868	217	0.01	49	0.4	26453	27.8	65	379	482	30779	OOR >	32229	OOR >	13961	74.7	100	4034	6700	1423	479	50	43	235	206	48	45	144	110	90	334	173	205	37	21	4490	720	8710
938	93869	0	6		0	1	0	0	2	2015-05-08	1	Mali 93869	25019	0.54	171	2	15449	12.1	370	78	83	124	1.3	30495	OOR >	200	3.1	320	1466	1091	10457	6278	123	373	138	111	98	95	332	536	172	249	624	98	202	100	31598	29572	26348
948	94850	1	3		0	1	1	1	3	2015-05-08	1	Mali 94850	30847	>2.39	382	3.8	27614	34.6	3461	806	1366	29693	OOR >	29541	OOR >	3593	27.2	197	829	4566	17434	6316	116	444	541	362	116	68	444	496	202	973	258	498	46	60	31883	7007	11318
948	94851	0	4	12	0	1	0	1	2	2015-05-08	1	Mali 94851	20880	0.38	161	1.9	27833	37.1	873	655	1184	30009	OOR >	28607	OOR >	27740	*124.5	237	1166	7630	15637	8922	125	261	282	175	144	62	371	2809	205	787	1425	219	47	70	31769	9932	2373
948	94852	0	3		0	1	0	0	1	2015-05-08	1	Mali 94852	12082	0.22	210	2.3	28952	OOR >	6412	880	523	30120	OOR >	28610	OOR >	28364	*126.6	368	518	2094	8886	5162	250	2258	366	282	173	166	877	585	585	613	1044	286	5086	911	941	25478	308
948	94853	0	6	13	0	1	0	0	1	2015-05-08	1	Mali 94853	24678	0.52	400	4	28574	OOR >	618	109	330	4226	20.4	29271	OOR >	276	4	293	811	16168	2271	1407	163	565	300	226	108	161	533	900	931	836	741	281	81	46	28016	5093	20393
948	94854	0	1		0	1	0	1	2	2015-05-08	1	Mali 94854	10493	0.2	160	1.8	27661	35	143	433	560	31870	OOR >	15571	39.2	31821	*137.8	103	252	580	28143	27922	97	949	328	202	111	71	114	205	101	237	475	508	38	37	29488	10424	1519
948	94855	0	4	10	0	1	0	1	2	2015-05-08	1	Mali 94855	27343	0.77	87	1	-881	OOR <	1099	265	2021	20829	62.8	31725	OOR >	1953	17.3	25	176	737	2473	1858	66	76	43	68	39	34	52	327	296	600	527	26	15	22	31981	28373	14188
948	94856	1	6	13	0	1	0	1	2	2015-05-08	1	Mali 94856	31892	>2.39	154	1.8	-789	OOR <	866	242	135	5044	23.1	24588	58.6	713	8.1	35	1796	1196	2122	4333	41	0	124	132	56	22	66	223	73	476	103	79	16	26	17099	4653	1205
948	94857	0	6	13	0	1	0	1	2	2015-05-08	1	Mali 94857	1433	0.05	121	1.4	26250	27.1	172	99	244	30260	OOR >	382	2.2	317	4.4	80	892	911	935	645	45	93	119	86	55	61	104	275	117	390	174	100	45	37	10612	1291	4438
948	94858	0	4		0	1	0	0	1	2015-05-08	1	Mali 94858	14821	0.26	152	1.8	28930	OOR >	4482	1043	837	29819	OOR >	31642	OOR >	29834	*131.4	206	2062	1531	29269	24643	150	590	1316	1007	131	141	238	887	269	355	395	818	37	54	14996	16189	3755
948	94859	0	2		0	1	0	0	1	2015-05-08	1	Mali 94859	518	0.02	163	1.9	26477	27.9	280	1831	2310	30104	OOR >	31507	OOR >	8408	51.3	148	610	2879	30145	27024	168	959	354	148	103	164	215	727	181	579	855	195	63	39	23505	25700	5064
948	94860	0	6		0	1	0	1	2	2015-05-08	1	Mali 94860	14725	0.26	768	6.5	22677	19.8	1794	2641	647	31488	OOR >	30883	OOR >	31349	*136.3	58	1892	3662	10774	2907	899	1135	374	382	92	66	123	4232	16092	181	583	257	87	26	3214	2095	444
948	94861	0	1		0	1	0	1	2	2015-05-08	1	Mali 94861	29141	1.44	81	0.9	-521	OOR <	699	147	242	20499	62	3633	12.9	53	1	26	1377	3359	30415	30213	66	174	890	814	39	86	87	336	197	328	83	442	13	18	3950	28655	2662
948	94862	1	1		0	1	0	0	1	2015-05-08	1	Mali 94862	16107	0.28	145	1.7	27957	38.9	967	226	272	5653	25.1	22767	53.5	151	2.5	52	76	203	8129	2044	104	260	109	83	49	94	224	254	215	435	186	211	31	83	31914	10972	999
948	94863	0	5		0	1	0	1	2	2015-05-08	1	Mali 94863	14312	0.25	62	0.6	-850	OOR <	137	432	809	657	5.4	27453	OOR >	467	5.9	27	630	2369	4162	1404	49	40	110	66	74	33	144	206	38	269	91	876	9	13	31497	15744	2417
948	94864	1	5	10	0	1	0	1	1	2015-05-08	1	Mali 94864	10384	0.2	376	3.8	-816	OOR <	519	229	352	30881	OOR >	31759	OOR >	31030	*135.3	157	590	2265	2490	6417	233	493	74	81	131	119	405	729	272	922	2486	90	75	74	30959	25849	2655
948	94865	1	1		0	1	0	0	1	2015-05-08	1	Mali 94865	30941	>2.39	31	OOR <	-788	OOR <	158	170	270	26353	OOR >	404	2.3	26662	*120.9	21	301	1531	10696	3950	152	169	69	39	37	104	83	257	199	298	53	31	10	15	9049	2850	23749
948	94866	0	1		0	1	0	1	2	2015-05-08	1	Mali 94866	28213	0.96	135	1.6	27491	33.5	531	1212	1625	6659	28.1	30452	OOR >	215	3.3	121	3431	1025	12250	6746	76	1064	191	122	90	53	107	224	94	453	194	134	34	36	30687	15997	1114
948	94867	1	6	13	0	1	0	1	2	2015-05-08	1	Mali 94867	29404	1.56	276	3	-386	OOR <	438	2796	3496	29956	OOR >	31578	OOR >	1522	14.4	126	215	1001	1893	1864	151	282	109	98	122	95	159	1214	182	727	338	123	93	91	28748	4798	7594
948	94868	0	5	11	0	1	0	1	2	2015-05-08	1	Mali 94868	8722	0.19	110	1.3	27746	36	710	8641	5861	28294	OOR >	31756	OOR >	896	9.7	181	476	573	2051	934	203	893	177	134	402	94	1047	1533	4661	523	455	210	1157	237	31814	27401	24990
948	94869	0	1		0	1	0	0	1	2015-05-08	1	Mali 94869	13536	0.24	48	0.3	-796	OOR <	24283	109	251	20991	63.2	31763	OOR >	702	8	25	112	687	309	450	29	542	276	204	51	22	70	246	94	189	312	292	60	38	31894	18500	3049
957	95750	1	1		0	1	0	0	2	2015-05-08	2	Mali 95750	26854	0.69	102	1.2	27789	36.5	79	227	563	154	1.6	31701	OOR >	96	1.7	106	726	7940	7957	2430	84	679	228	242	154	55	235	609	150	747	249	298	817	51	30694	10062	14846
957	95751	1	3		0	1	0	0	1	2015-05-08	2	Mali 95751	109	0.005	164	1.9	-455	OOR <	102	293	126	12362	43.2	32084	OOR >	544	6.6	74	312	3775	501	269	96	280	669	902	76	46	182	176	288	617	239	255	52	49	6790	4407	496
957	95752	1	6	13	0	1	0	0	1	2015-05-08	2	Mali 95752	4904	0.14	278	3	28740	OOR >	582	1500	383	28314	OOR >	13863	35.9	4775	33.6	114	229	22965	5363	1168	95	703	429	461	148	50	264	741	331	814	455	397	51	86	28276	11493	830
957	95753	0	3		0	1	0	0	2	2015-05-08	2	Mali 95753	4398	0.13	392	3.9	25369	24.6	396	178	366	31731	OOR >	32303	OOR >	8544	51.9	155	2405	19240	3089	1165	261	376	285	295	183	122	482	615	383	634	279	224	114	116	18930	22399	6593
957	95754	0	4	12	0	1	0	0	1	2015-05-08	2	Mali 95754	591	0.02	201	2.3	2767	1.8	32172	3816	120	10296	38.1	32102	OOR >	1061	11	59	272	458	3785	699	77	268	191	125	112	30	156	466	2277	1026	175	107	31	269	32447	12147	2086
957	95755	1	6	12	0	1	0	0	2	2015-05-08	2	Mali 95755	408	0.02	195	2.2	29659	OOR >	1814	1615	191	15542	50.7	3505	12.5	175	2.8	455	1882	1110	24127	22146	408	1056	373	295	153	298	705	750	592	636	603	440	83	90	162	24171	231
957	95756	1	5	12	0	1	0	0	2	2015-05-08	2	Mali 95756	1764	0.06	67	0.7	23714	21.3	79	4672	371	168	1.8	13315	34.8	229	3.4	72	149	16118	799	253	86	449	102	120	40	44	98	242	354	217	3140	141	40	40	5653	7525	300
957	95757	1	1		0	1	0	1	2	2015-05-08	2	Mali 95757	10340	0.2	72	0.8	29678	OOR >	1740	77	199	107	1.1	22600	53.1	67	1.3	63	247	744	25113	7792	66	663	422	305	64	43	84	511	73	395	160	311	34	168	28941	14422	692
957	95758	0	4	17	0	1	1	0	3	2015-05-08	2	Mali 95758	10245	0.2	926	7.5	28208	45.1	429	658	710	8743	34	31717	OOR >	13612	73.3	255	1563	1523	5290	1763	132	910	477	446	156	100	1332	337	181	984	357	386	618	120	31369	26123	399
957	95759	1	5	13	0	1	1	1	3	2015-05-08	2	Mali 95759	1279	0.05	249	2.7	6916	4.9	20034	322	2020	31251	OOR >	32208	OOR >	20925	100.9	52	1115	2571	5478	2226	219	468	237	179	170	38	175	835	101	936	262	170	39	61	20729	2838	564
957	95760	1	6	14	0	1	0	0	2	2015-05-08	2	Mali 95760	22459	0.43	246	2.7	27902	38	215	539	963	31368	OOR >	32203	OOR >	31591	*137.1	221	679	5515	3378	1758	291	1332	472	361	187	139	421	852	271	812	2775	466	74	165	31023	11655	14465
957	95761	1	5	14	0	1	1	1	3	2015-05-08	2	Mali 95761	23929	0.48	125	1.5	7848	5.7	597	404	1216	10316	38.1	31103	OOR >	27442	*123.5	54	630	769	1109	930	65	486	126	82	63	29	654	706	124	432	1285	103	32	237	31992	3950	2143
957	95762	1	4		0	1	0	0	2	2015-05-08	2	Mali 95762	5924	0.15	181	2.1	23303	20.7	3411	2677	1361	27266	OOR >	24296	57.6	208	3.2	179	309	1744	23090	6407	155	444	503	330	132	73	242	300	153	562	237	387	72	92	31878	8486	917
957	95763	0	6	15	0	1	1	1	3	2015-05-08	2	Mali 95763	6088	0.15	125	1.5	13146	10.1	610	80	89	8418	33.1	4884	16.1	107	1.9	18	569	1400	1905	801	38	316	281	222	50	19	224	62	40	117	173	86	38	18	38	3597	68
957	95764	0	5		0	1	0	1	2	2015-05-08	2	Mali 95764	857	0.03	2169	14	-472	OOR <	176	492	279	8415	33.1	3634	12.9	527	6.5	43	373	1221	2531	1470	76	278	54	34	103	69	103	394	589	967	511	71	412	47	29465	13073	4894
957	95765	1	6	12	0	1	1	1	3	2015-05-08	2	Mali 95765	594	0.02	237	2.6	28561	OOR >	366	202	262	19325	59.3	11559	31.2	9152	54.6	50	546	1306	1730	837	51	2451	203	170	85	36	135	1605	125	314	623	153	29	30	30867	6936	4529
957	95766	0	5	15	0	1	0	0	2	2015-05-08	2	Mali 95766	12469	0.23	1021	8.1	-336	OOR <	2060	294	173	10747	39.2	8348	24.3	1112	11.3	210	1179	3887	2322	1456	295	449	164	161	154	71	410	349	493	525	325	154	171	531	3089	282	658
957	95767	0	5	10	0	1	0	1	2	2015-05-08	2	Mali 95767	935	0.03	196	2.2	7958	5.8	484	544	761	27086	OOR >	31960	OOR >	1168	11.8	103	504	875	6625	1130	133	7469	214	249	111	47	147	510	161	333	371	195	159	1555	31751	5936	2281
957	95768	0	2		0	1	0	0	1	2015-05-08	2	Mali 95768	2070	0.07	73	0.8	4	OOR <	599	10614	13739	2539	14.3	5742	18.3	174	2.8	33	193	834	10338	4588	40	469	193	174	54	25	55	111	49	334	69	186	41	41	31713	16616	4842
957	95769	1	5	15	0	1	0	0	2	2015-05-08	2	Mali 95769	1809	0.06	462	4.4	29800	OOR >	663	91	703	26424	OOR >	2112	8.5	430	5.6	233	546	1612	2127	995	258	700	300	222	158	57	254	1118	426	355	794	243	276	274	31186	14928	3615
959	95950	1	3		0	1	1	1	3	2015-05-08	2	Mali 95950	3319	0.11	148	1.7	27915	38.2	32011	470	962	118	1.3	86	0.6	90	1.6	163	4651	1202	29144	17541	218	384	316	145	86	157	223	481	842	175	169	182	38	56	24890	24025	5370
959	95951	0	4		0	1	0	1	2	2015-05-08	2	Mali 95951	3044	0.1	635	5.7	28535	OOR >	104	148	439	31212	OOR >	32115	OOR >	1993	17.6	134	2726	9290	1562	1024	99	358	882	592	188	60	178	235	641	685	361	529	41	50	31499	27402	3093
959	95952	0	4	10	0	1	0	1	2	2015-05-08	2	Mali 95952	29712	1.74	48	0.4	29286	OOR >	42	204	258	734	5.9	42	0.3	1340	13	91	191	119	8769	2814	35	263	766	643	78	58	100	65	49	77	80	269	21	55	27483	21251	1809
959	95953	0	3	9	0	1	0	1	2	2015-05-08	2	Mali 95953	25965	0.6	42	0.2	-78	OOR <	26	371	528	81	0.8	17	0.1	18	0.3	18	2352	2397	8338	10581	43	251	58	59	40	19	39	74	38	218	54	59	12	19	28405	29344	11301
959	95954	1	6	14	0	1	0	1	2	2015-05-08	2	Mali 95954	27358	0.76	211	2.4	29759	OOR >	189	206	470	1346	9.1	12845	33.9	1441	13.8	260	4996	21274	3985	780	176	565	398	367	150	101	393	249	169	484	223	630	56	51	28747	195	2709
959	95955	0	6	14	0	1	0	1	2	2015-05-08	2	Mali 95955	689	0.03	75	0.8	28615	OOR >	2092	155	168	228	2.3	26798	OOR >	59	1.1	60	521	765	4196	1490	239	415	1482	2198	89	1855	472	378	321	874	102	583	90	56	29304	8867	293
959	95956	1	5	15	0	1	0	1	2	2015-05-08	2	Mali 95956	3958	0.13	123	1.4	29787	OOR >	287	123	182	960	7.1	30348	OOR >	90	1.6	191	388	2766	5552	3750	95	635	672	638	186	31912	1052	251	156	1058	183	401	43	53	56	79	74
959	95957	0	5	11	0	1	1	1	3	2015-05-08	2	Mali 95957	26361	0.65	51	0.4	-777	OOR <	92	161	197	26	OOR <	353	2.1	19	0.4	26	338	824	27352	17916	48	588	108	53	32	36	77	303	37	10681	1484	147	294	17	46	28317	49
959	95958	1	6	12	0	1	1	1	3	2015-05-08	2	Mali 95958	1618	0.06	156	1.8	29993	OOR >	275	427	465	1682	10.7	30143	OOR >	1047	10.8	348	2186	6926	3871	3448	285	811	387	413	116	205	532	482	355	429	794	813	81	65	32063	27254	25416
959	95959	0	5	11	0	1	0	1	2	2015-05-08	2	Mali 95959	28186	0.94	48	0.4	28094	41.7	261	149	260	1306	8.9	256	1.6	1088	11.2	58	583	5001	26076	16883	36	435	152	88	53	59	108	195	60	342	121	101	34	90	31739	16790	24896
959	95960	0	5		0	1	1	1	3	2015-05-08	2	Mali 95960	24686	0.52	56	0.5	30037	OOR >	2338	560	663	312	3	82	0.6	333	4.6	69	796	802	6351	1766	53	477	252	170	86	43	91	162	68	447	99	326	25	21	29720	27989	25569
959	95961	0	6	14	0	1	0	1	2	2015-05-08	2	Mali 95961	334	0.01	91	1	29246	OOR >	39	80	148	747	5.9	5680	18.1	517	6.4	80	485	6416	5324	1458	40	451	787	565	67	31	86	88	73	281	169	205	371	37	31749	11389	1315
959	95962	1	4	10	0	1	1	1	3	2015-05-08	2	Mali 95962	16717	0.29	112	1.3	30135	OOR >	32176	154	380	206	2.1	304	1.9	201	3.1	227	326	2439	22347	16156	282	984	358	284	128	223	316	314	313	577	218	410	72	55	31597	24178	4457
959	95963	1	3		0	1	0	1	2	2015-05-08	2	Mali 95963	30447	>2.39	75	0.8	29862	OOR >	31633	449	518	901	6.8	54	0.4	28	0.6	68	3984	12704	26768	17165	62	365	257	118	81	45	102	151	76	378	75	181	195	405	32041	26435	7149
959	95964	0	3		0	1	1	1	3	2015-05-08	2	Mali 95964	55	0.005	83	0.9	-328	OOR <	893	121	144	17836	55.9	14339	36.8	135	2.3	30	179	6987	2123	4306	227	288	59	41	65	756	287	296	311	10595	11890	52	316	25	30585	29338	930
959	95965	1	3	9	0	1	0	1	2	2015-05-08	2	Mali 95965	24278	0.5	61	0.6	27953	38.9	156	525	443	237	2.4	107	0.8	216	3.3	48	2453	1381	3509	931	58	165	111	77	84	35	89	89	76	242	74	103	210	62	30765	21940	1563
959	95966	1	3	11	0	1	1	1	3	2015-05-08	2	Mali 95966	714	0.03	78	0.9	-782	OOR <	161	450	618	14573	48.5	26743	OOR >	9216	54.9	30	360	2042	5352	6777	69	64	129	121	63	36	75	330	72	496	156	302	113	65	31524	23303	982
959	95967	0	5	11	0	1	1	1	3	2015-05-08	2	Mali 95967	3403	0.11	142	1.7	29550	OOR >	567	1401	2374	199	2.1	183	1.2	117	2	302	889	8275	11213	2924	282	640	423	340	174	93	294	259	237	362	296	323	53	77	13303	17785	7304
967	96750	1	4	11	0	1	1	0	2	2015-05-08	2	Mali 96750	29166	1.45	148	1.7	25484	24.9	513	313	608	31876	OOR >	31943	OOR >	31815	*137.8	62	2222	4902	11548	6711	128	1264	259	168	134	75	227	1032	383	492	815	203	130	296	31775	21870	6223
967	96751	0	6	14	0	1	0	1	1	2015-05-08	2	Mali 96751	263	0.01	508	4.8	23148	20.4	1901	308	350	31434	OOR >	10693	29.4	31175	*135.8	224	1079	2248	14098	2000	277	1405	379	261	166	64	3871	741	246	390	395	302	191	164	573	2398	629
967	96752	0	1	6	0	1	1	1	3	2015-05-08	2	Mali 96752	1657	0.06	97	1.1	27633	34.8	2044	131	405	841	6.5	30947	OOR >	1016	10.6	34	413	857	12773	9682	62	568	157	136	156	51	197	255	285	247	156	141	26	30	25040	5176	527
967	96753	0	2	7	0	1	0	1	2	2015-05-08	2	Mali 96753	8110	0.18	384	3.8	27460	33.2	4771	1268	2426	31908	OOR >	31930	OOR >	31538	*136.9	209	14811	23788	24279	10281	266	945	409	302	224	118	371	504	313	407	487	347	87	121	3014	27912	1487
967	96754	0	6	14	0	1	0	1	2	2015-05-08	2	Mali 96754	24166	0.49	411	4.1	29790	OOR >	166	199	678	29806	OOR >	31370	OOR >	30118	*132.3	243	1588	11436	13440	6411	256	2033	1089	936	191	83	1437	1701	757	1322	1313	1091	106	93	31390	19622	4757
967	96755	0	3	11	0	1	0	1	2	2015-05-18	1	Mali 96755	5205	0.15	297	3.13	24961	23.67	488	766	946	29207	OOR >	30980	OOR >	25306	*116.27	107	1186	1377	9965	2180	91	601	435	350	144	29613	12008	783	374	577	470	327	47	79	31027	23703	6756
967	96756	0	4	11	0	1	0	1	2	2015-05-18	1	Mali 96756	1721	0.06	152	1.76	21354	18.03	234	733	1066	26161	OOR >	31153	OOR >	27332	*123.11	119	896	10328	5690	3575	122	792	322	292	176	57	166	297	116	547	190	203	112	97	29685	3363	3253
967	96757	1	5	11	0	1	0	1	2	2015-05-18	1	Mali 96757	2652	0.09	223	2.47	24953	23.65	64	1395	404	31161	OOR >	31224	OOR >	30969	*135.09	86	2407	1042	21577	11373	79	4446	342	256	224	63	113	808	118	727	308	288	1609	62	5806	309	230
967	96758	1	1	7	0	1	0	1	2	2015-05-18	1	Mali 96758	29475	1.53	321	3.33	-843	OOR <	1075	1529	966	31443	OOR >	30833	OOR >	30897	*134.86	100	687	3861	8768	3995	126	174	609	555	164	26255	2033	937	449	497	431	672	1301	49	147	24515	255
967	96759	0	2	8	0	1	0	1	2	2015-05-18	1	Mali 96759	29475	1.53	136	1.58	16470	12.99	760	88	332	20580	62.23	30972	OOR >	9144	54.56	48	270	18531	4846	2463	49	23	304	220	71	31	348	691	124	404	712	208	25	30	29958	23028	1424
967	96760	1	6	14	0	1	0	1	2	2015-05-18	1	Mali 96760	29775	1.94	712	6.17	24173	22.12	837	2175	295	29312	OOR >	29891	OOR >	27011	*122.04	213	24471	4714	4745	2499	142	673	3699	3724	113	7549	587	1897	1158	607	899	1210	385	127	3454	19383	1967
967	96761	1	5	14	0	1	0	1	2	2015-05-18	1	Mali 96761	30779	>2.39	150	1.74	26298	27.28	295	158	241	27048	OOR >	14443	37.04	25981	*118.56	78	335	2189	4742	4605	209	1093	215	162	67	153	175	453	300	474	254	210	46	42	30722	18881	3972
967	96762	0	5	14	0	1	0	0	1	2015-05-18	1	Mali 96762	29046	1.39	249	2.71	24475	22.68	1412	392	490	28334	OOR >	24383	57.86	24549	*113.67	131	2767	3947	4523	1186	141	1149	1720	1630	135	54	458	418	262	861	441	1937	341	1721	31280	23117	1913
967	96763	1	3	10	0	1	0	1	1	2015-05-18	1	Mali 96763	25001	0.54	175	2	24908	23.55	510	312	583	29758	OOR >	25801	65	28367	*126.56	82	20644	5274	4973	3129	87	270	194	141	354	67	470	537	269	536	198	248	125	91	177	24457	575
967	96764	1	2	7	0	1	0	1	2	2015-05-18	1	Mali 96764	13255	0.24	547	5.05	25572	25.11	66	1128	1311	26920	OOR >	29515	OOR >	2665	21.79	99	6811	4025	5004	3056	169	3315	189	139	127	50	165	753	277	519	547	152	31	41	462	18055	300
967	96765	0	4	10	0	1	1	1	2	2015-05-18	1	Mali 96765	1225	0.04	400	3.96	25027	23.81	2207	175	554	29558	OOR >	30802	OOR >	25686	*117.56	102	2071	6169	18257	4682	113	888	347	228	109	51	227	473	160	602	202	247	38	66	24256	25509	4748
967	96766	1	6	13	0	1	0	1	2	2015-05-18	1	Mali 96766	30958	>2.39	350	3.57	26953	30.02	246	1470	1190	24156	73.96	30284	OOR >	27838	*124.81	322	8184	25168	3286	2841	333	516	442	347	275	193	592	860	352	1079	520	366	82	108	28774	25686	1899
967	96767	1	3	9	0	1	1	1	3	2015-05-18	1	Mali 96767	24315	0.51	160	1.84	25242	24.3	3549	1746	1220	4798	22.34	701	3.61	216	3.27	106	550	6462	1270	1879	64	701	222	155	85	108	160	843	101	392	294	214	40	43	24299	5508	21121
967	96768	1	6	13	0	1	1	1	3	2015-05-18	1	Mali 96768	30903	>2.39	94	1.07	22490	19.5	505	24079	370	29633	OOR >	30735	OOR >	28568	*127.23	64	670	3254	12410	3450	54	677	544	303	76	34	147	603	102	555	106	251	31	130	27097	25048	14240
967	96769	1	4	13	0	1	1	1	3	2015-05-18	1	Mali 96769	31155		141	1.64	17222	13.69	131	6033	5356	306	3	30417	OOR >	250	3.66	34	701	5354	10413	2906	30	338	308	255	54	31	70	2212	83	520	198	219	202	64	30058	13498	3854
969	96950	0	2		0	1	0	1	2	2015-05-18	1	Mali 96950	14818	0.26	96	1.09	26631	28.54	359	364	496	5968	26.02	2508	9.68	5214	35.92	176	341	1115	24711	6004	82	1800	191	128	89	173	510	362	270	475	205	112	25	76	24021	1324	9323
969	96951	0	2	6	0	1	0	1	2	2015-05-18	1	Mali 96951	187	0.006	139	1.62	27501	33.56	175	270	282	29296	OOR >	27001	OOR >	29696	*130.94	368	306	817	23681	15627	195	809	384	324	258	238	740	142	234	444	339	362	97	111	23002	14352	21935
969	96952	0	3		0	1	0	1	2	2015-05-18	1	Mali 96952	14735	0.26	4857	24.96	24191	22.15	369	277	426	2143	12.67	21945	51.67	1306	12.8	347	2063	1333	16823	4890	320	2780	283	222	165	272	472	522	440	390	314	217	58	72	29696	26704	4506
969	96953	0	3	6	0	1	1	0	3	2015-05-18	1	Mali 96953	28993	1.4	78	0.85	26861	29.56	305	614	1568	3050	16.25	330	2	224	3.37	255	3863	5754	4356	2017	93	4206	223	176	64	24111	2280	100	118	289	147	289	47	57	120	23709	140
969	96954	1	3		0	1	0	1	2	2015-05-18	1	Mali 96954	26485	0.66	93	1.06	25893	25.99	1441	5606	4111	29858	OOR >	28582	OOR >	28954	*128.51	135	969	954	8608	11836	61	2856	235	146	72	108	298	103	88	332	159	192	63	54	27929	2978	6756
969	96955	0	3	10	0	1	0	0	2	2015-05-18	1	Mali 96955	7210	0.17	167	1.91	25875	25.94	363	802	896	27376	OOR >	26055	67.94	27349	*123.17	108	499	3290	2378	2305	140	3200	151	98	56	89	141	166	154	345	111	133	78	27	30091	24964	14602
969	96956	1	4	11	0	1	0	0	2	2015-05-18	1	Mali 96956	28492	1.1	30	OOR <	24623	22.97	128	19	66	74	0.68	3780	13.26	62	1.2	60	101	123	14010	1105	35	281	144	100	111	31	92	139	54	217	70	281	14	195	79	14799	72
969	96957	1	4	9	0	1	1	1	3	2015-05-18	1	Mali 96957	23560	0.46	335	3.45	25229	24.27	40	4583	5191	29214	OOR >	29772	OOR >	27841	*124.82	127	2617	5368	9433	3005	62	637	645	575	82	64	238	613	97	359	721	2462	31	162	30341	26322	14502
969	96958	1	4		0	1	1	1	3	2015-05-18	1	Mali 96958	5985	0.15	85	0.95	26254	27.13	662	385	447	25135	87.64	461	2.6	6507	42.36	75	3607	13718	24226	6275	61	4758	194	102	55	42	109	386	102	301	1276	151	34	27	30590	26718	4261
969	96959	1	5	11	0	1	1	1	3	2015-05-18	1	Mali 96959	2380	0.08	176	2.01	26880	29.66	2425	251	510	20959	63.15	13559	35.29	404	5.29	355	788	2617	10048	2877	234	2778	359	295	213	169	547	349	189	391	264	748	66	144	30018	18122	4417
969	96960	1	6	14	0	1	1	1	3	2015-05-18	1	Mali 96960	412	0.02	229	2.52	26052	26.47	946	449	661	27888	OOR >	29379	OOR >	26174	*119.22	152	1503	17654	26671	22166	267	1749	5424	4710	151	180	499	529	468	4475	1359	1562	59	70	27175	12303	6554
969	96961	1	6	14	0	1	0	1	2	2015-05-18	1	Mali 96961	29209	1.45	281	2.99	22312	19.26	2298	2823	523	28065	OOR >	29900	OOR >	24275	*112.73	284	1201	25053	3710	4188	383	781	305	317	256	10155	827	931	285	729	805	310	273	216	29820	15835	6074
969	96962	1	6	15	0	1	1	1	3	2015-05-18	1	Mali 96962	29191	1.39	229	2.52	-520	OOR <	27912	681	1195	30553	OOR >	30148	OOR >	30176	*132.51	124	1104	12935	24447	9315	101	1445	617	487	111	143	230	559	593	304	335	263	79	169	27173	24625	25647
969	96963	1	6		0	1	0	1	2	2015-05-18	1	Mali 96963	21361	0.39	120	1.4	23640	21.21	25722	262	361	29091	OOR >	27749	OOR >	11481	64.62	118	486	16484	24283	4482	89	560	269	156	282	71	178	370	128	416	220	265	45	52	23510	13967	3257
969	96964	1	2		0	1	0	1	2	2015-05-18	1	Mali 96964	4876	0.14	66	0.67	24211	22.19	37	1830	3037	707	5.7	1618	6.91	475	5.99	94	767	3095	12406	5402	106	6172	121	94	103	56	96	395	73	268	175	165	32	36	29409	10905	1153
969	96965	1	5	10	0	1	0	1	2	2015-05-18	1	Mali 96965	10438	0.21	51	0.41	25675	25.38	26061	4071	95	141	1.51	6483	20.06	124	2.11	61	240	2967	13650	18746	75	328	187	126	62	79	129	132	135	151	73	137	38	54	30251	24886	708
969	96966	0	6	11	0	1	0	0	2	2015-05-18	1	Mali 96966	24325	0.51	118	1.37	25917	26.06	1600	101	220	2467	13.99	29945	OOR >	1898	16.92	221	5579	1390	12284	7215	90	159	245	240	71	108	305	400	210	231	254	159	60	109	27561	14354	599
[truncated: 9 more columns]
